# Supplementary material
Source: Research Square preprint supplement (doi:10.21203/rs.3.rs-9261172/v1)
Supplement: Supplementary file 1 [file 3b1a538d4177aa033ecacdec.pdf]

# SI to Mapping the Reaction Landscapes of Molten-Salt Fluxes

Gregory Bassen<sup>1,2,3</sup>, Rebecca Y. Han<sup>1,2,3</sup>, Thomas J. Whoriskey<sup>1,2,3</sup>, Allana Iwanicki<sup>1,2,3</sup>, Ragy Ebeid<sup>2</sup>, Kathryn Kingsbury<sup>2</sup>, Jayson B. Johnson<sup>2</sup>, Joshua Hummel<sup>3</sup>, Thomas J. Kempa<sup>2</sup>, and Tyrel M. McQueen<sup>1,2,3</sup>

<sup>1</sup> Institute for Quantum Matter, William H. Miller III Department of Physics and Astronomy, Johns Hopkins University, 3400 N. Charles Street, Baltimore, MD 21218, United States of America

<sup>2</sup> Department of Chemistry, Johns Hopkins University, 3400 N. Charles Street, Baltimore, MD 21218, United States of America

<sup>3</sup> Department of Materials Science and Engineering, Johns Hopkins University, 3400 N. Charles Street, Baltimore, MD 21218, United States of America

Correspondence: [gbassen1@jhu.edu](mailto:gbassen1@jhu.edu); [mcqueen@jhu.edu](mailto:mcqueen@jhu.edu)  
March 29, 2026

## Table of Contents

|                                                                        |                  |
|------------------------------------------------------------------------|------------------|
| <b>Figure S1–S35</b><br>Rietveld refinements of RP nickelates          | <b>pp. 1–46</b>  |
| <b>Figure S36</b><br>Rietveld refinement of $\text{Sr}_2\text{NaIO}_6$ | <b>p. 47</b>     |
| <b>Table S1–S5</b><br>Crystallographic parameters                      | <b>pp. 48–56</b> |
| <b>Table S6–S10</b><br>Refined phase fractions of products             | <b>pp. 57–63</b> |
| <b>Table S11</b><br>Free energy of alkali perhalates                   | <b>p. 64</b>     |

## Supplemental Text

Fluxes specifically used for oxides generally melt at low-temperature and are used to grow crystals, such as the conventional  $\text{PbO/PbF}_2$ ,  $\text{Na}_2\text{CO}_3$ ,  $\text{K}_2\text{CO}_3$ ,  $\text{Bi}_2\text{O}_3$ ,  $\text{K}_2\text{MoO}_4$  [1, 2]. However, 'soft alkali halide' fluxes (Br, I) have scarcely been used for the synthesis of oxides [3]. The discovery of high-temperature superconductivity in  $\text{La}_2\text{CuO}_4$  [4] led to an explosion of synthesis in the oxide phase-space and the subsequent discovery of numerous perovskite-derived structure types [5]. This has since prompted the search for high-temperature superconductivity in structurally and chemically analogous phase spaces to the well-studied cuprate materials. There was a resurgence of interest in the perovskite-derived structure types with the discovery of superconductivity in thin films of the reduced nickelates  $\text{LnNiO}_2$  ( $\text{Ln} = \text{La, Pr, Nd}$ ) [6–10]. Further studies on the Ruddlesden-Popper members of the bulk nickelates led to the discovery of high-temperature superconductivity under pressure [11, 12]. Material scientists have explored molten salt fluxes to synthesize ruddlesden-popper nickelates under ambient oxygen pressure, underscoring the role of oxygen chemical potential in flux reactions. For example,  $\text{LaNiO}_3$  was first synthesized and discovered using a sodium carbonate flux at 800 °C for 72 hours [13]. Further, KOH flux leads to the formation of  $\text{LaNiO}_3$ , whereas NaOH leads to the formation of  $\text{La}_2\text{NiO}_4$  under ambient pressures [14]. Synthesizing phase-pure  $\text{LaNiO}_3$  remains especially challenging: it has been obtained via polycrystalline synthesis at 950°C under 2000bar  $\text{O}_2$  [15], and in floating zone growths above 50bar  $\text{O}_2$  [16–18].

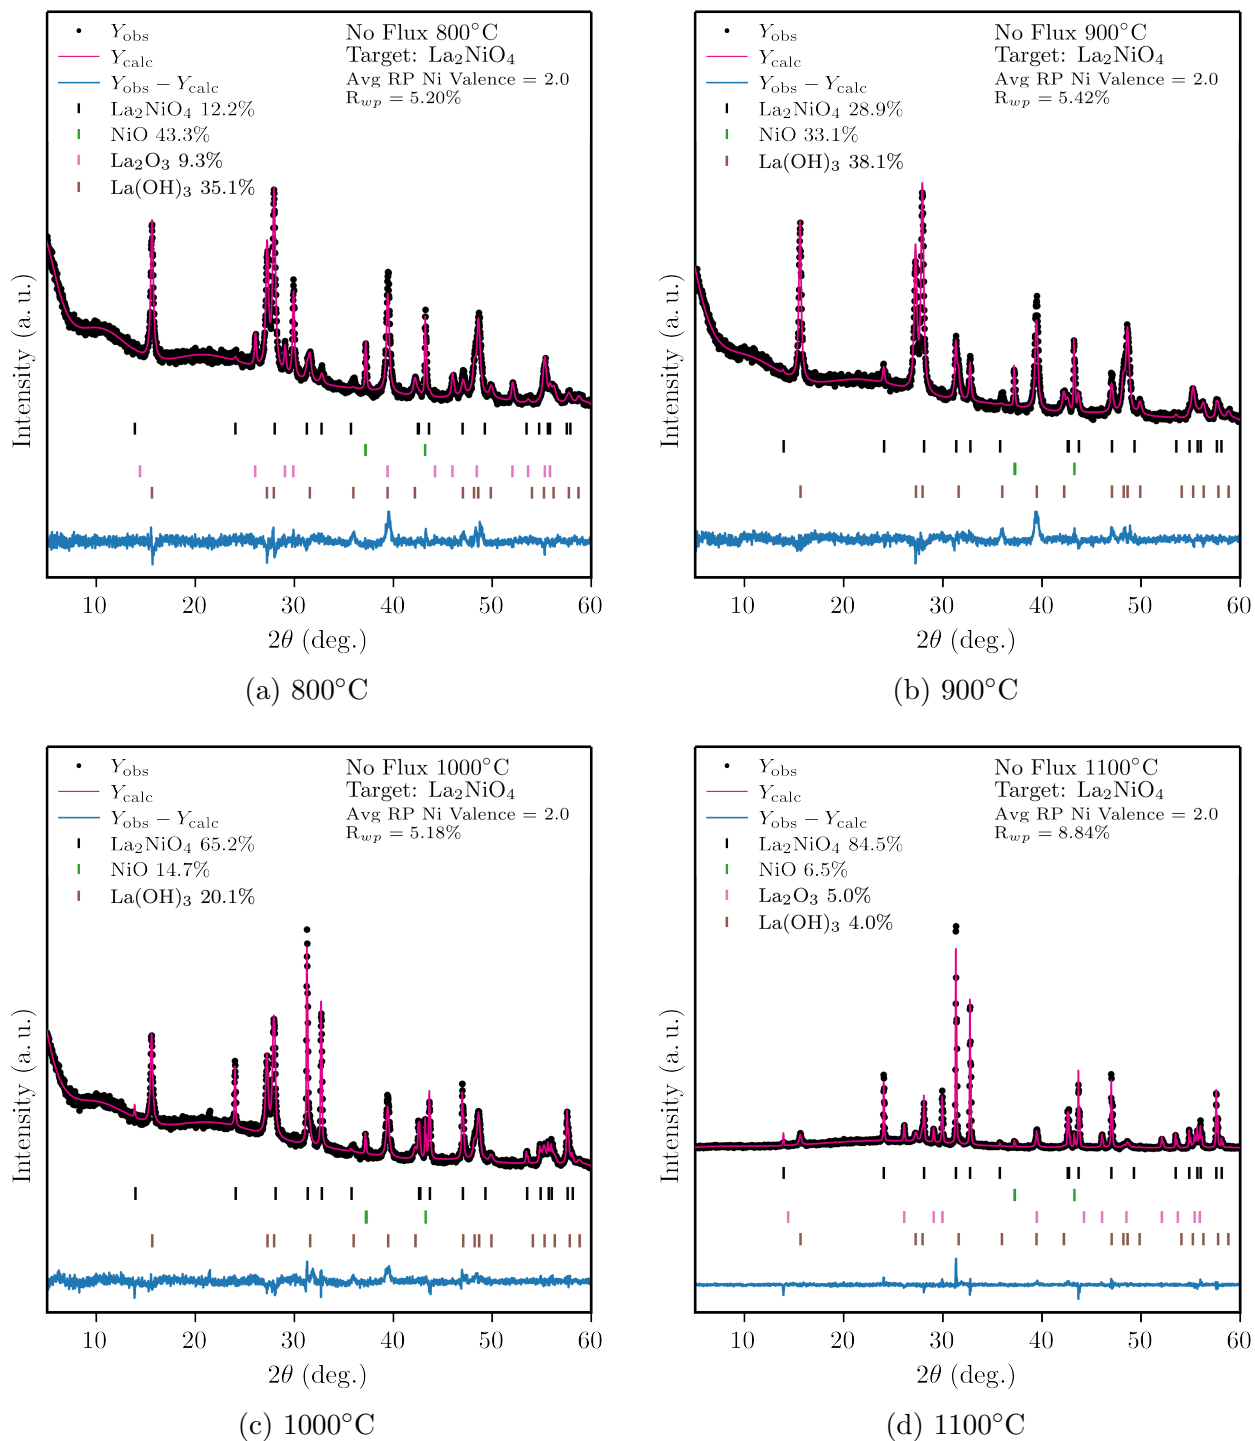

Figure 1: PXR D and Rietveld refinements of targeted  $\text{La}_2\text{NiO}_4$  where  $\frac{\text{Ni}}{\text{Ni}+\text{La}} = 0.33$  without a flux at (a) 800°C, (b) 900°C, (c) 1000°C, and (d) 1100°C.

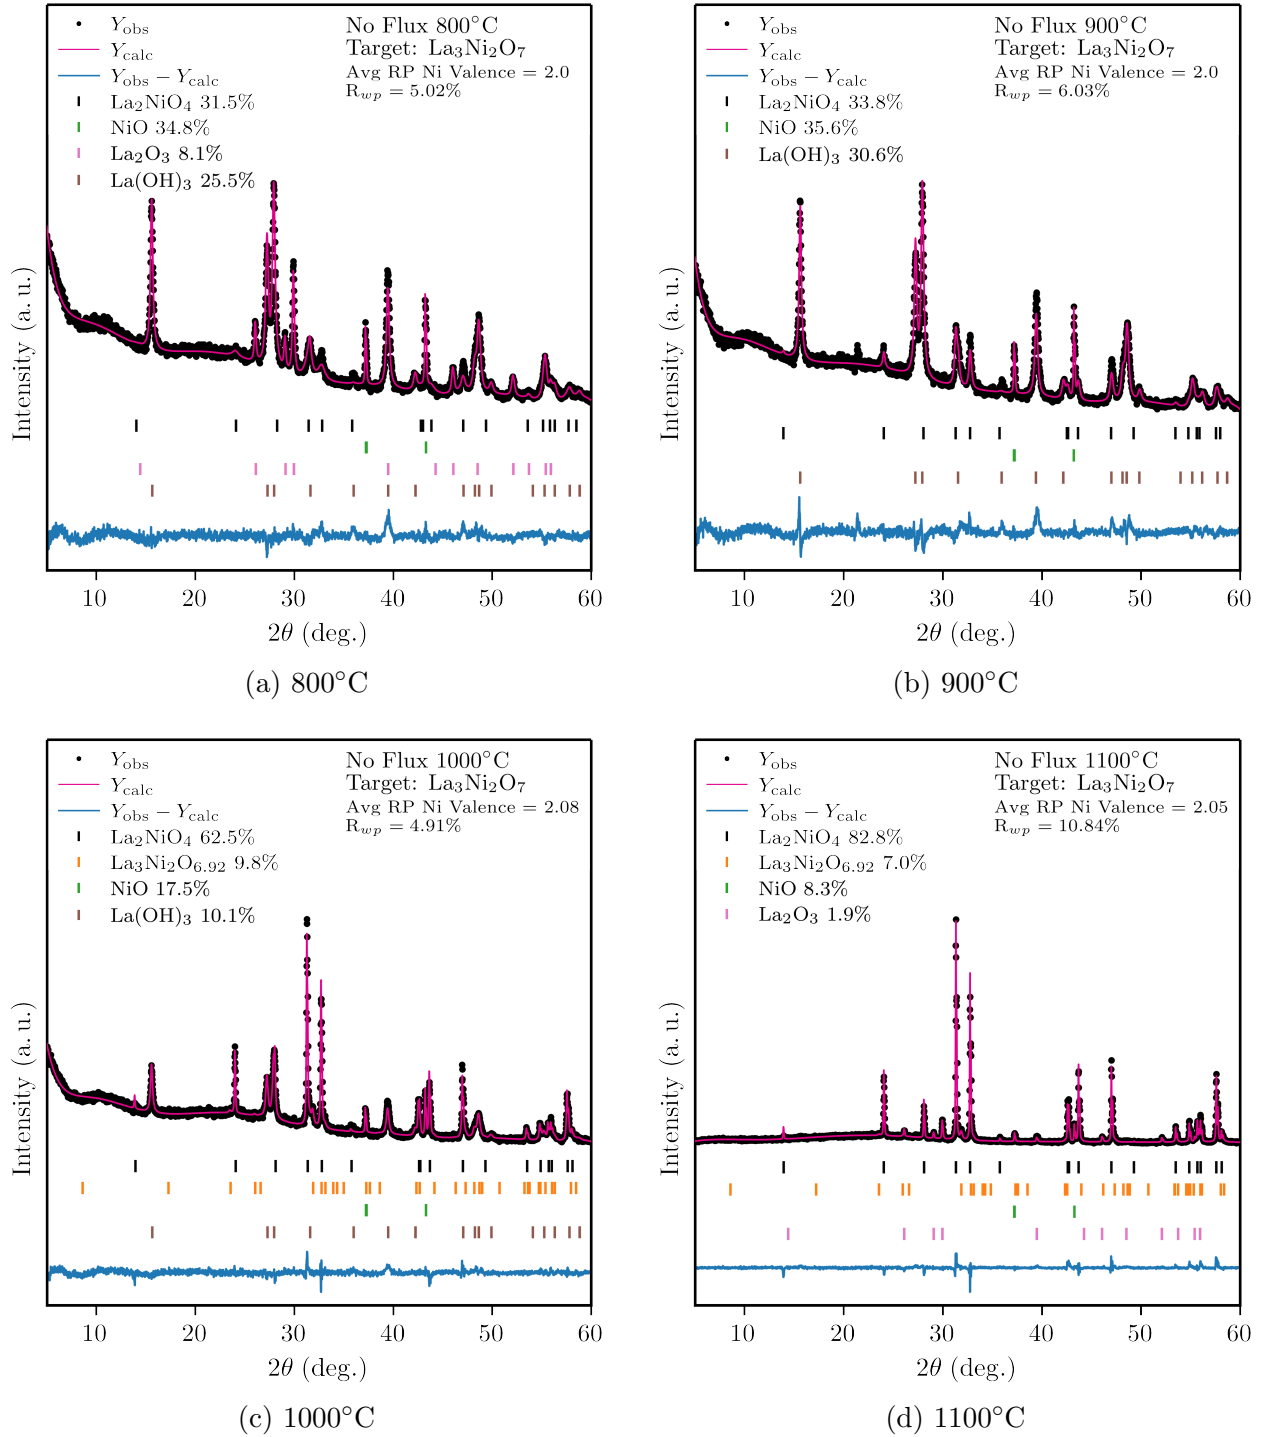

Figure 2: PXRD and Rietveld refinements of targeted  $\text{La}_3\text{Ni}_2\text{O}_7$  where  $\frac{\text{Ni}}{\text{Ni}+\text{La}} = 0.40$  without a flux at (a) 800°C, (b) 900°C, (c) 1000°C, and (d) 1100°C.

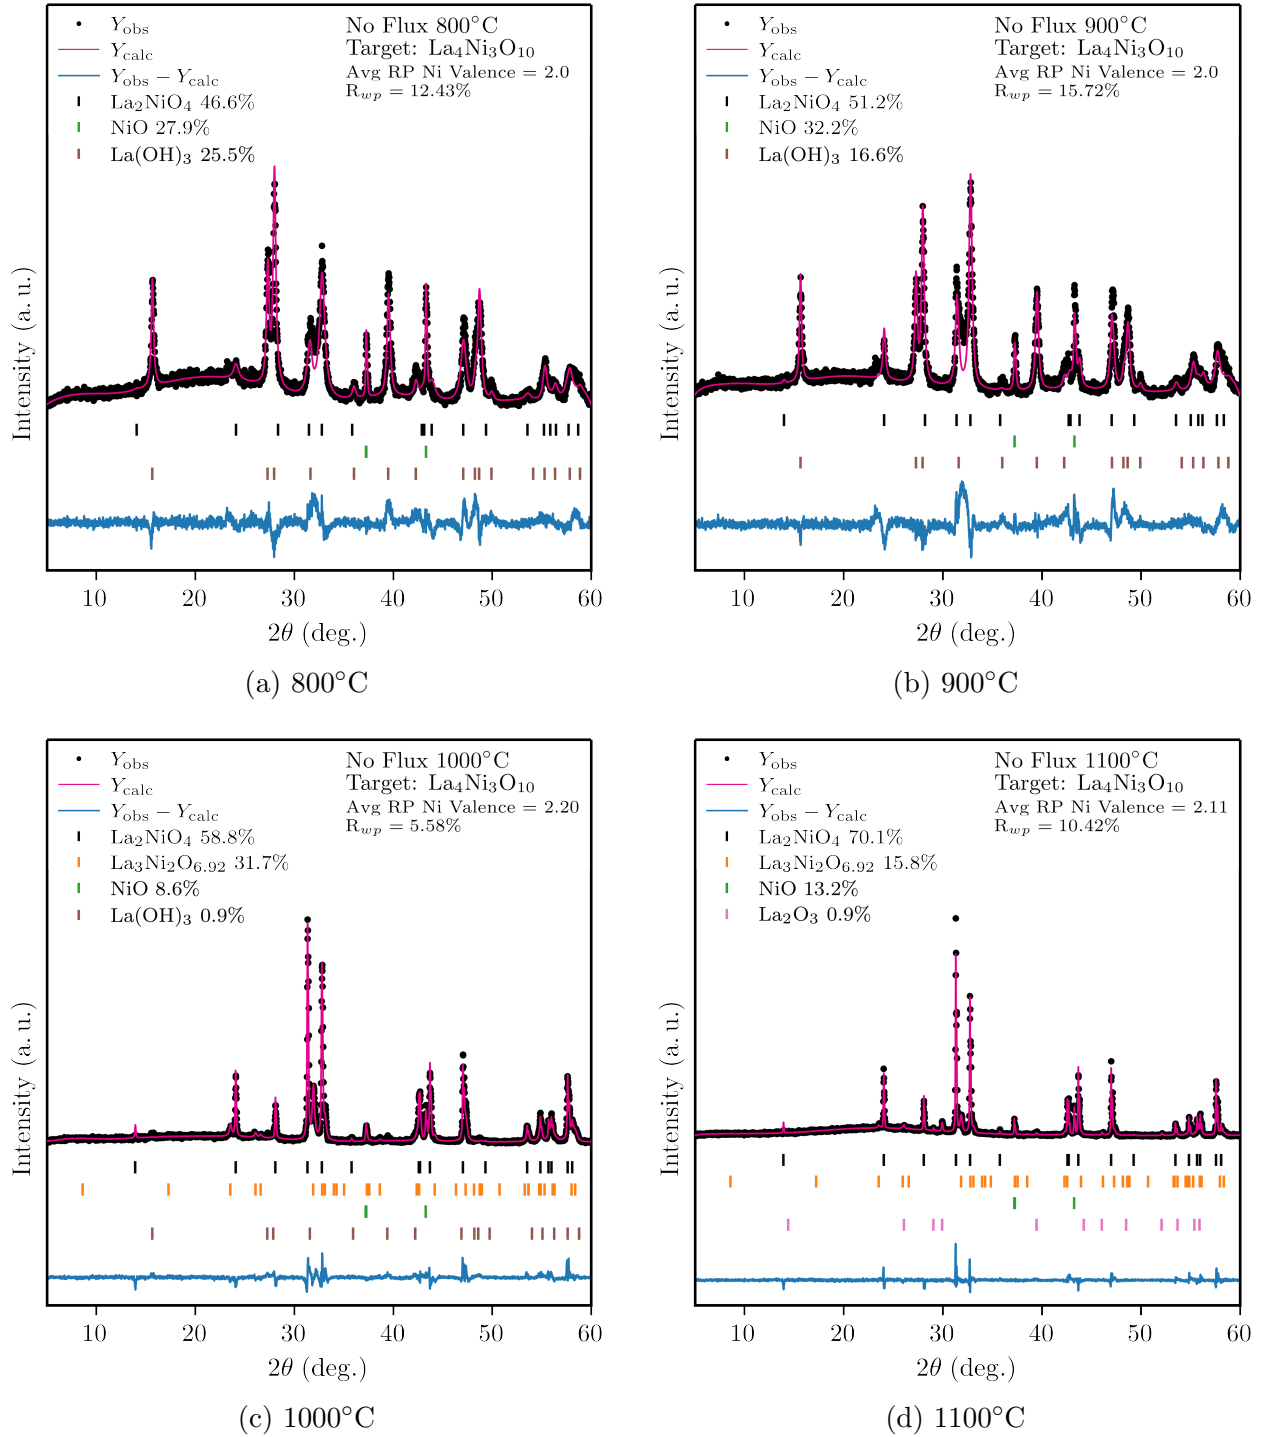

Figure 3: PXRD and Rietveld refinements of targeted  $\text{La}_4\text{Ni}_3\text{O}_{10}$  where  $\frac{\text{Ni}}{\text{Ni}+\text{La}} = 0.43$  without a flux at (a) 800°C, (b) 900°C, (c) 1000°C, and (d) 1100°C.

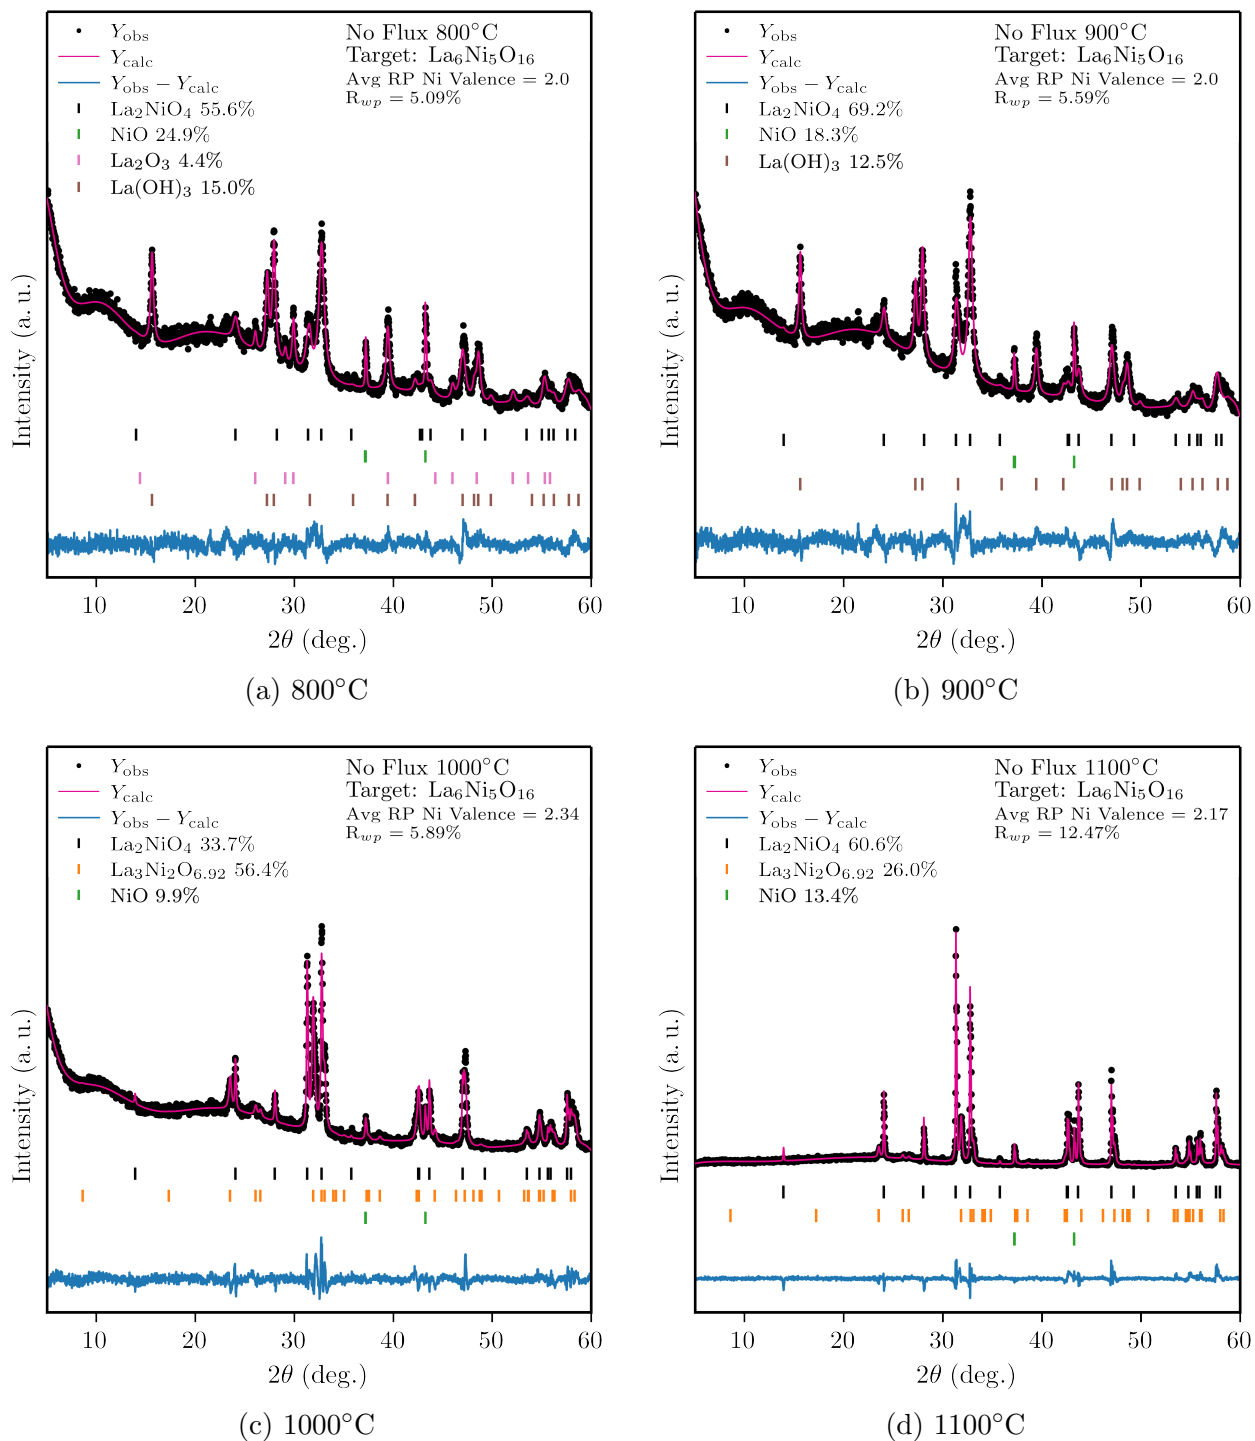

Figure 4: PXRD and Rietveld refinements of targeted  $\text{La}_6\text{Ni}_5\text{O}_{16}$  where  $\frac{\text{Ni}}{\text{Ni+La}} = 0.454$  without a flux at (a) 800°C, (b) 900°C, (c) 1000°C, and (d) 1100°C.

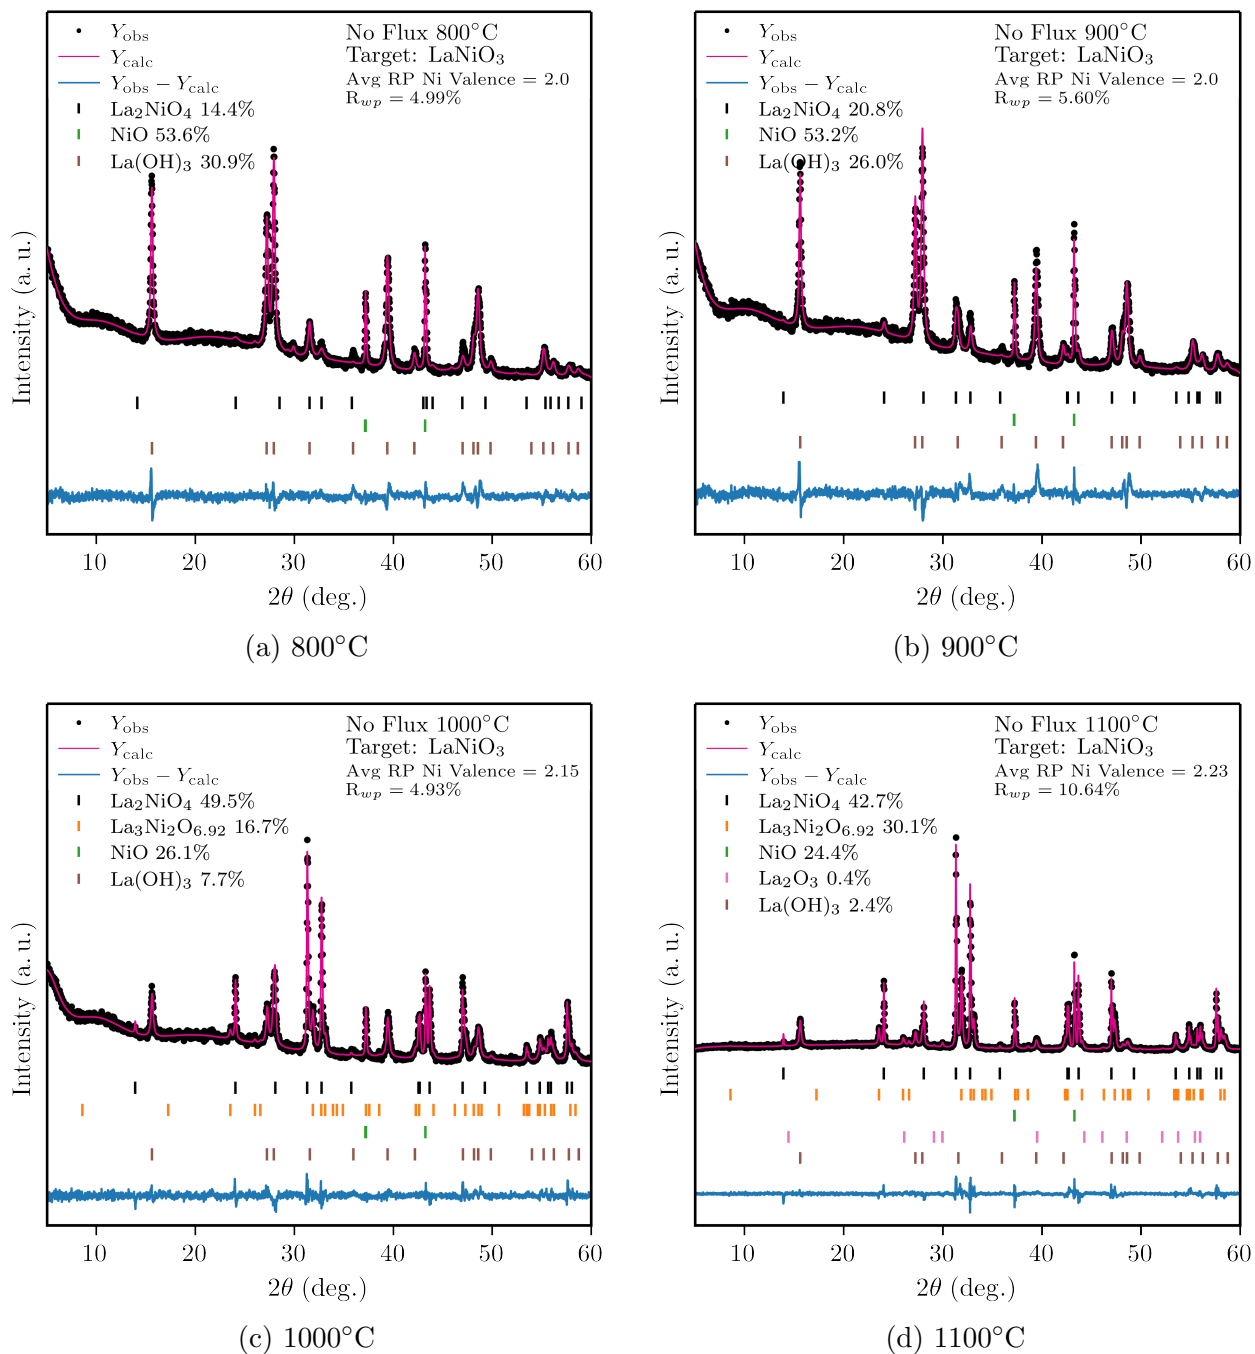

Figure 5: PXRD and Rietveld refinements of targeted  $\text{LaNiO}_3$  where  $\frac{\text{Ni}}{\text{Ni}+\text{La}} = 0.5$  without a flux at (a) 800°C, (b) 900°C, (c) 1000°C, and (d) 1100°C.

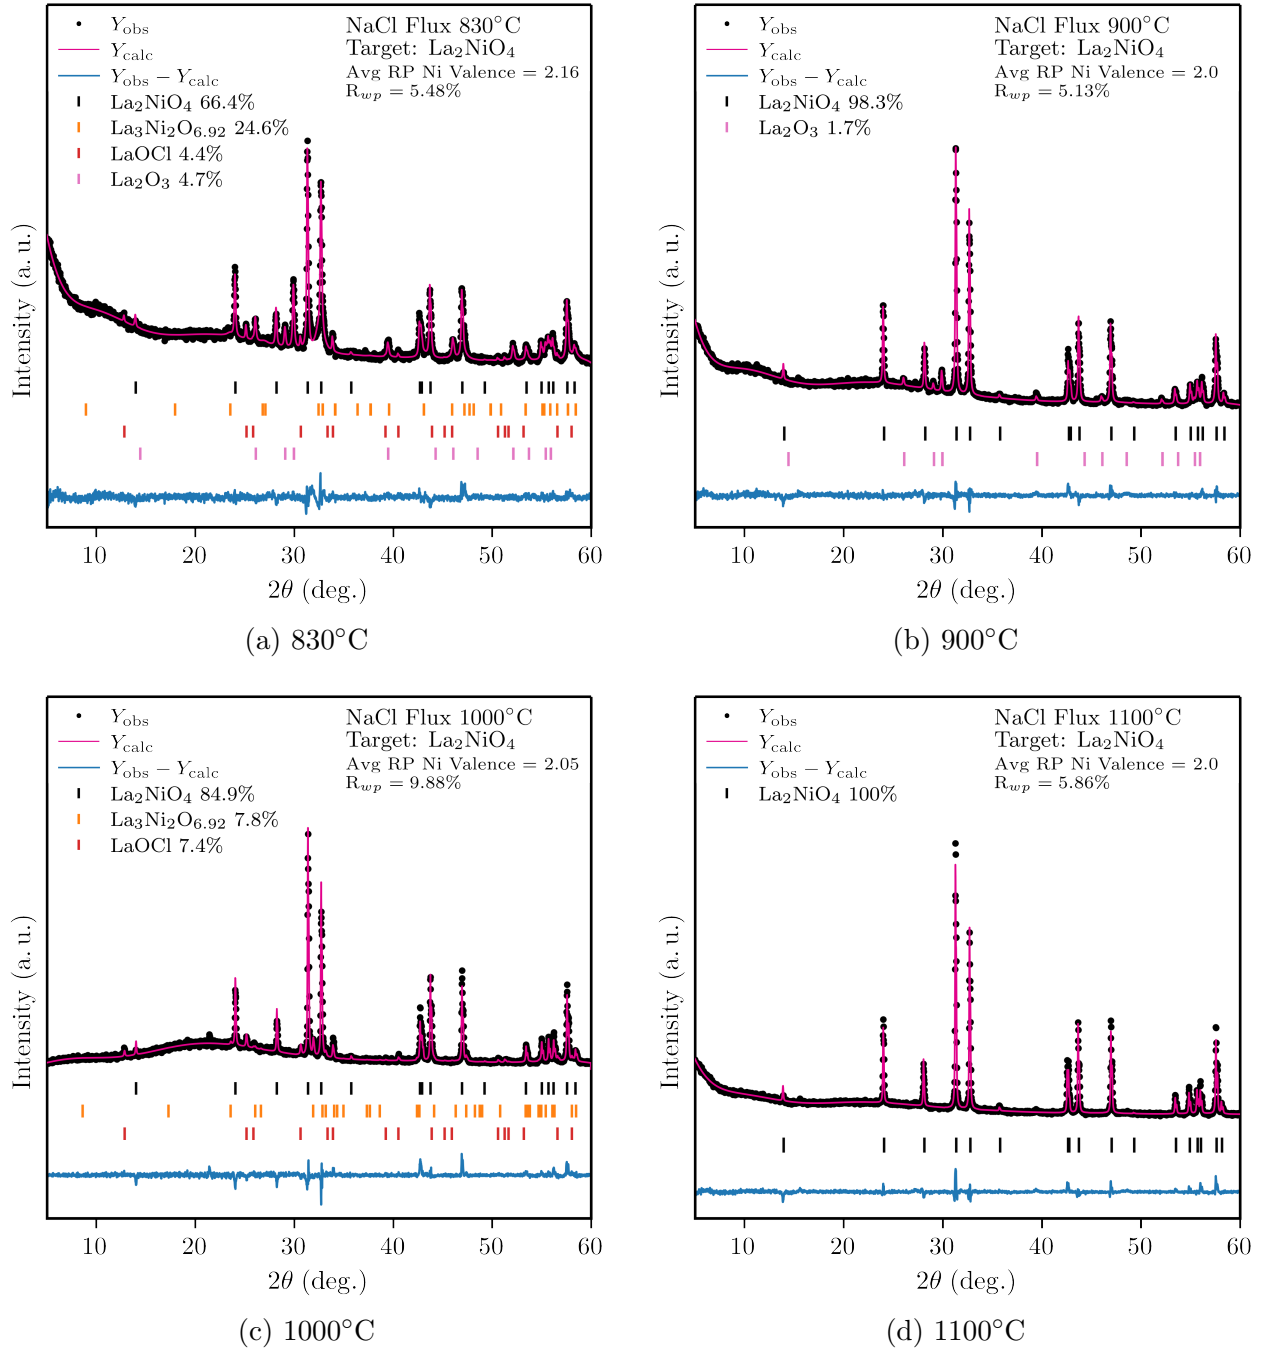

Figure 6: PXRD and Rietveld refinements of targeted  $\text{La}_2\text{NiO}_4$  where  $\frac{\text{Ni}}{\text{Ni+La}}} = 0.33$  in NaCl flux at (a) 830°C, (b) 900°C, (c) 1000°C, and (d) 1100°C.

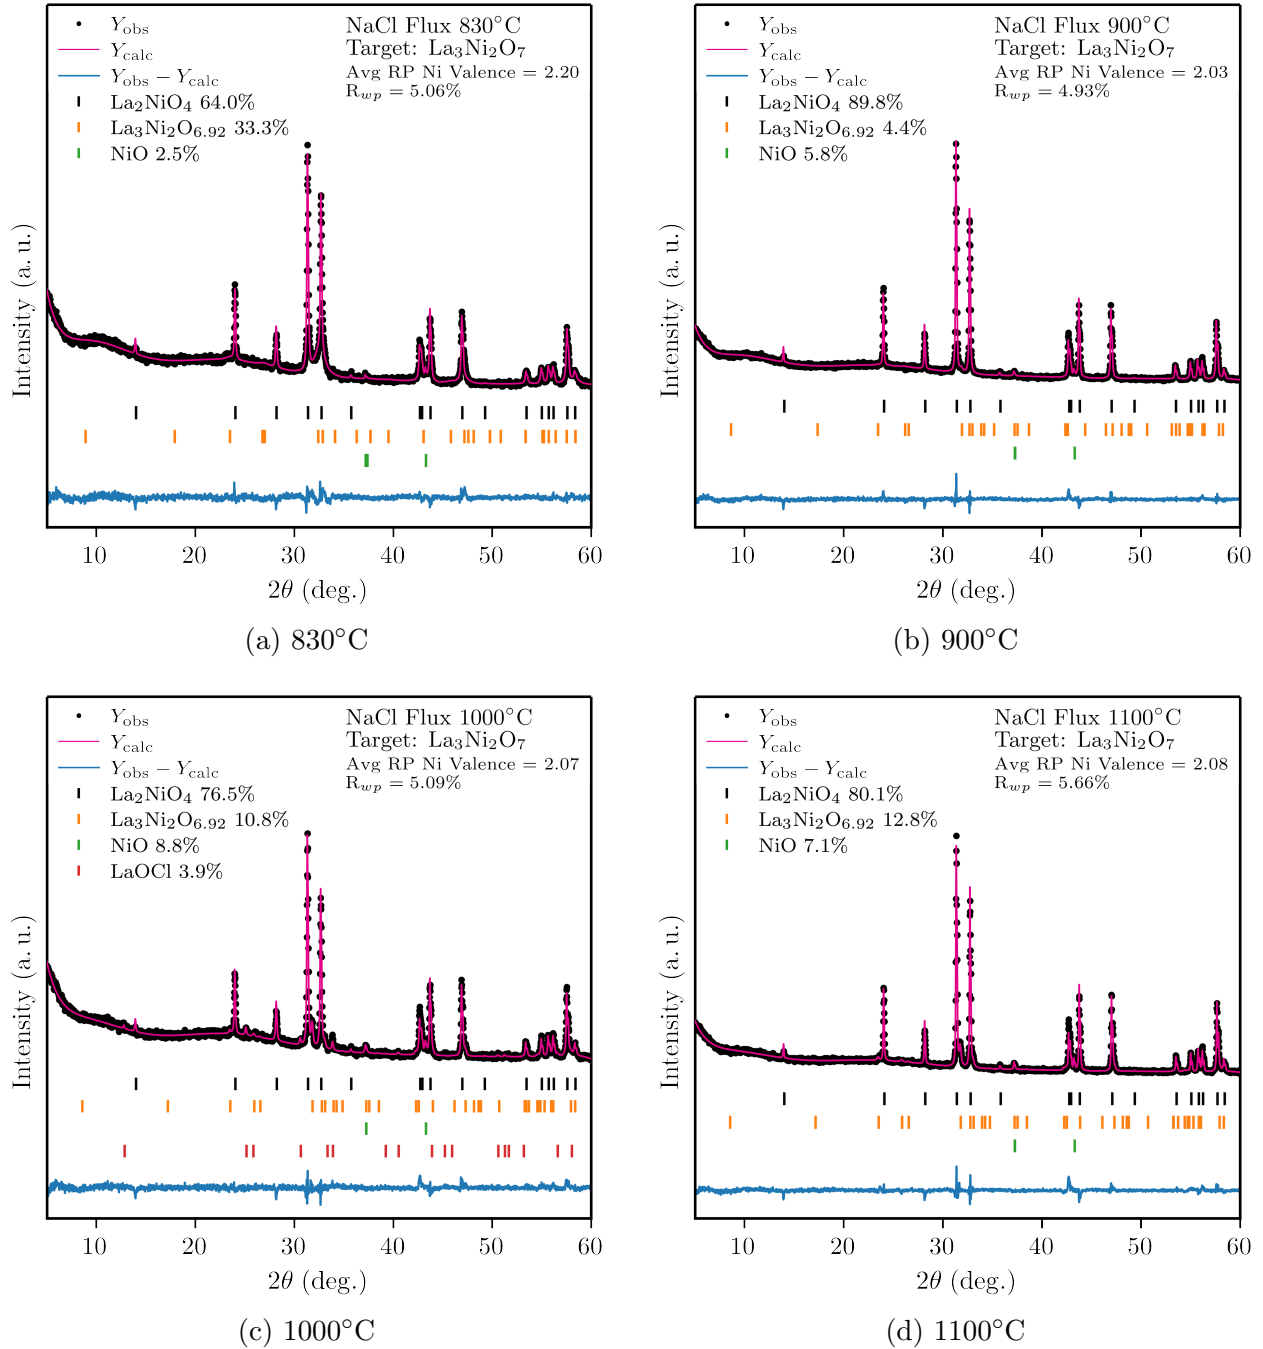

Figure 7: PXRd and Rietveld refinements of targeted  $\text{La}_3\text{Ni}_2\text{O}_7$  where  $\frac{\text{Ni}}{\text{Ni}+\text{La}} = 0.40$  in NaCl flux at (a) 830°C, (b) 900°C, (c) 1000°C, and (d) 1100°C.

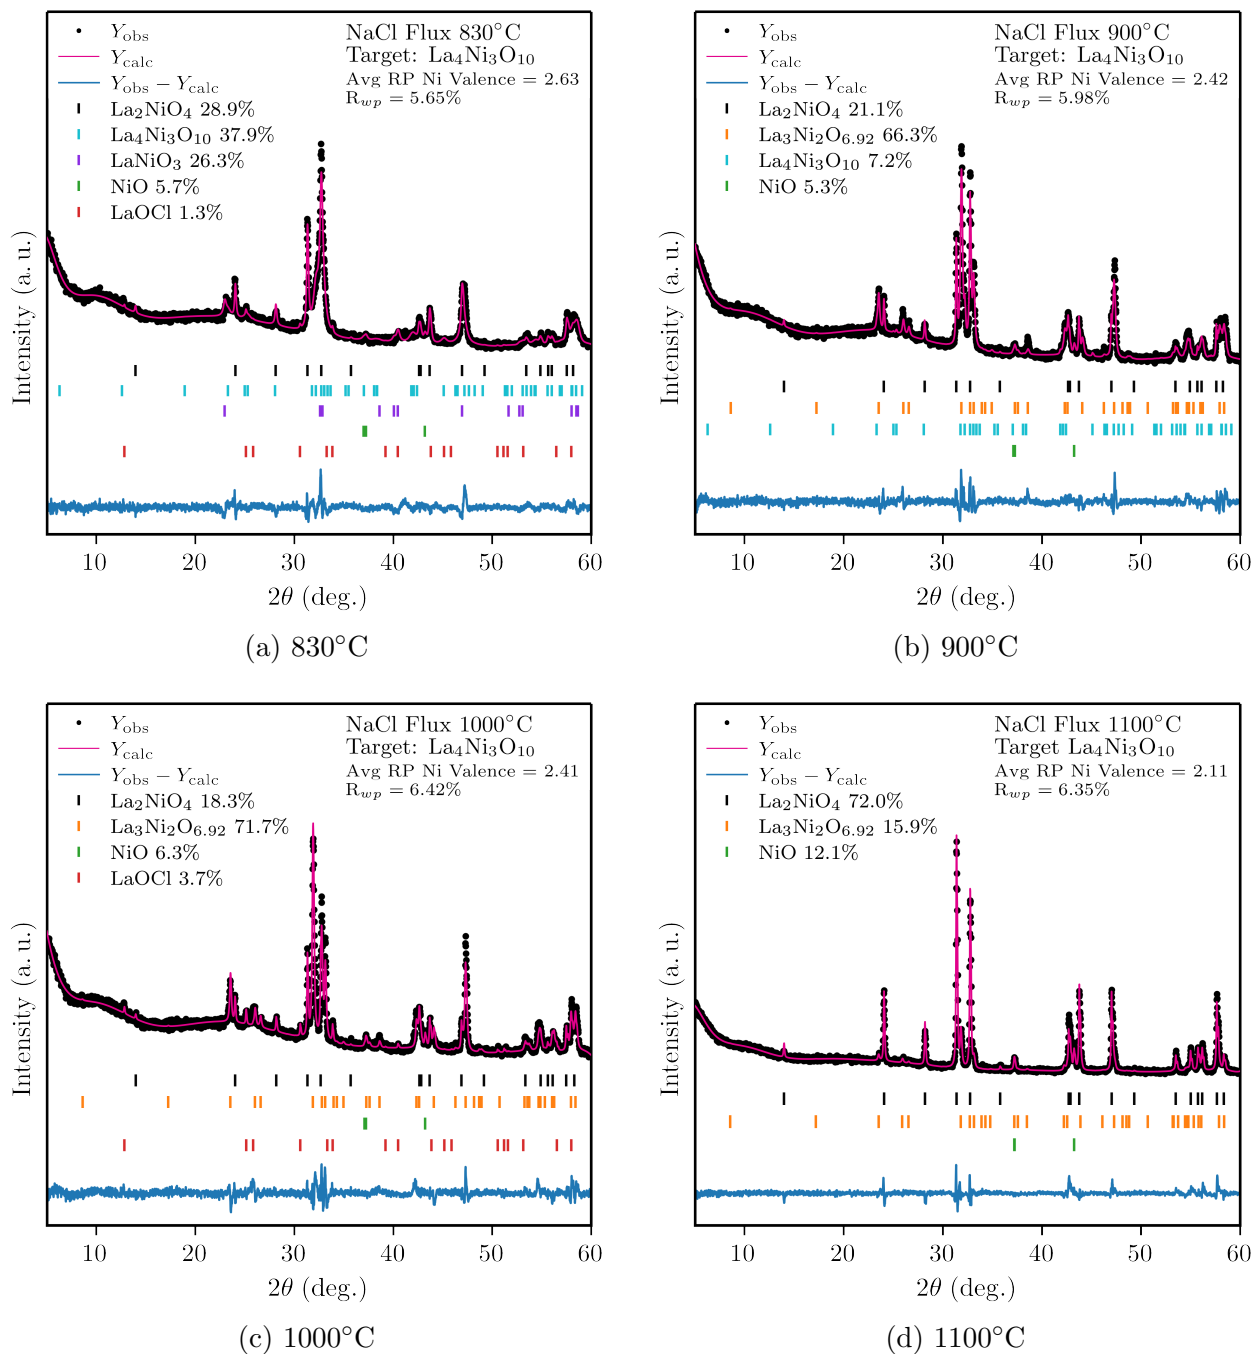

Figure 8: PXRD and Rietveld refinements of targeted  $\text{La}_4\text{Ni}_3\text{O}_{10}$  where  $\frac{\text{Ni}}{\text{Ni}+\text{La}} = 0.43$  in NaCl flux at (a) 830°C, (b) 900°C, (c) 1000°C, and (d) 1100°C.

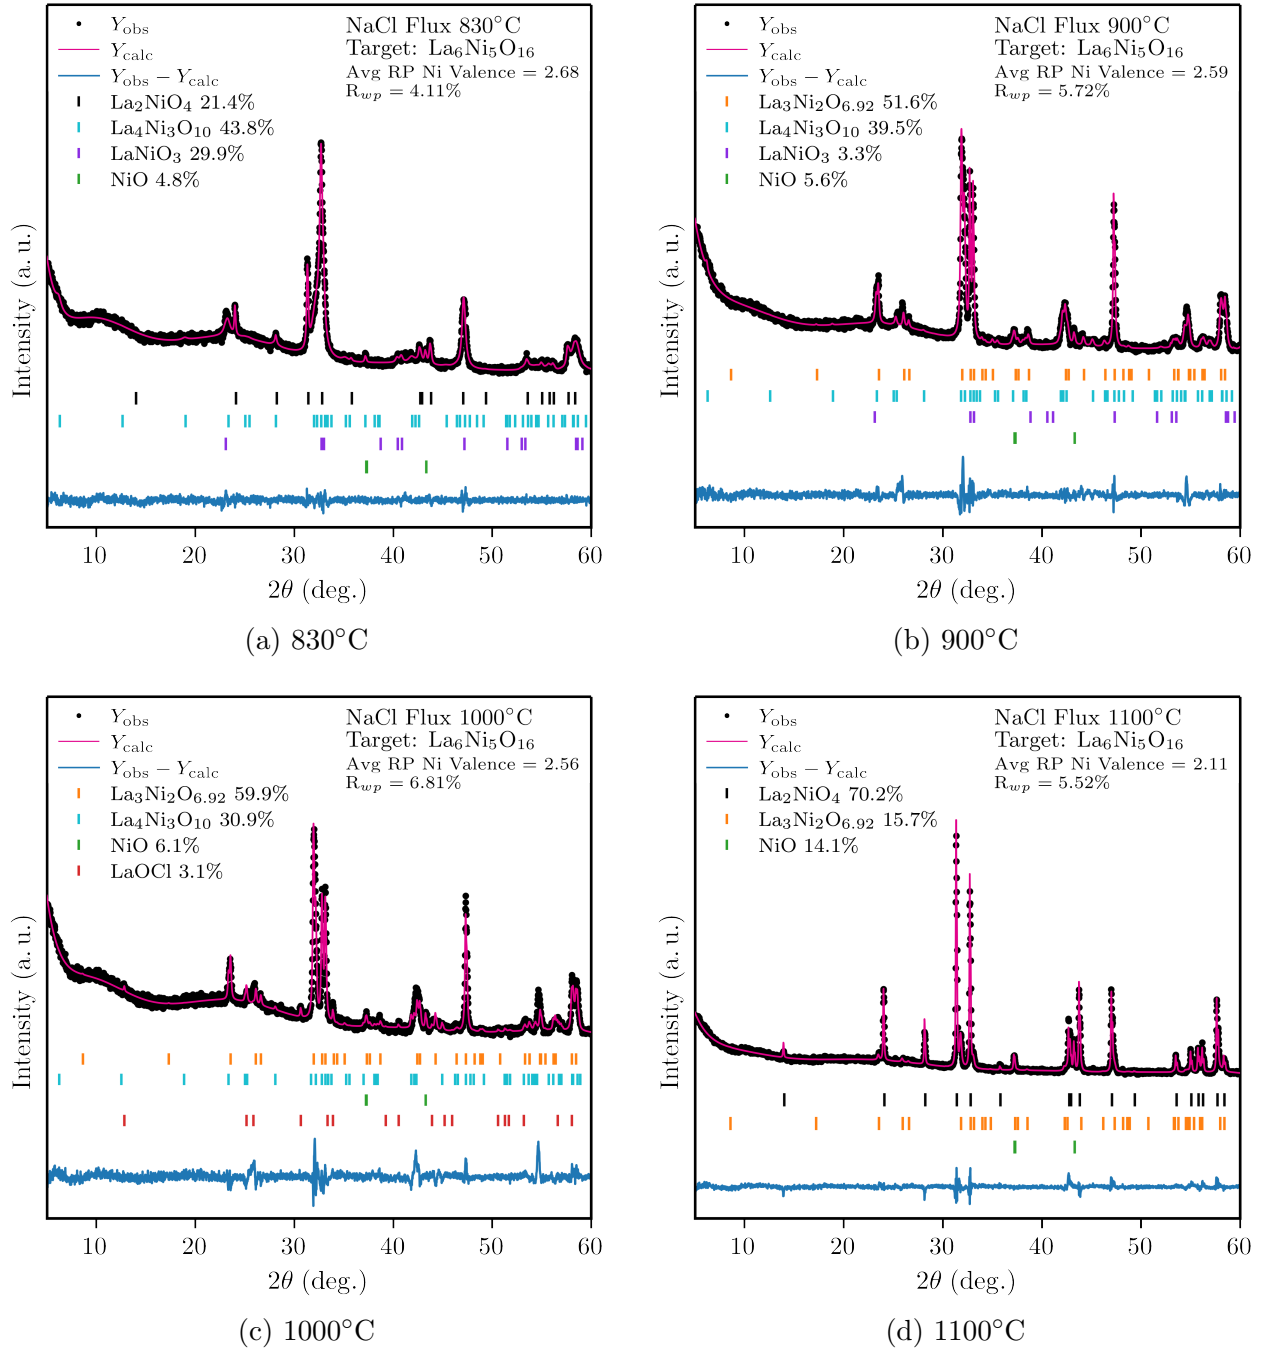

Figure 9: PXRd and Rietveld refinements of targeted  $\text{La}_6\text{Ni}_5\text{O}_{16}$  where  $\frac{\text{Ni}}{\text{Ni}+\text{La}} = 0.454$  in NaCl flux at (a) 830°C, (b) 900°C, (c) 1000°C, and (d) 1100°C.

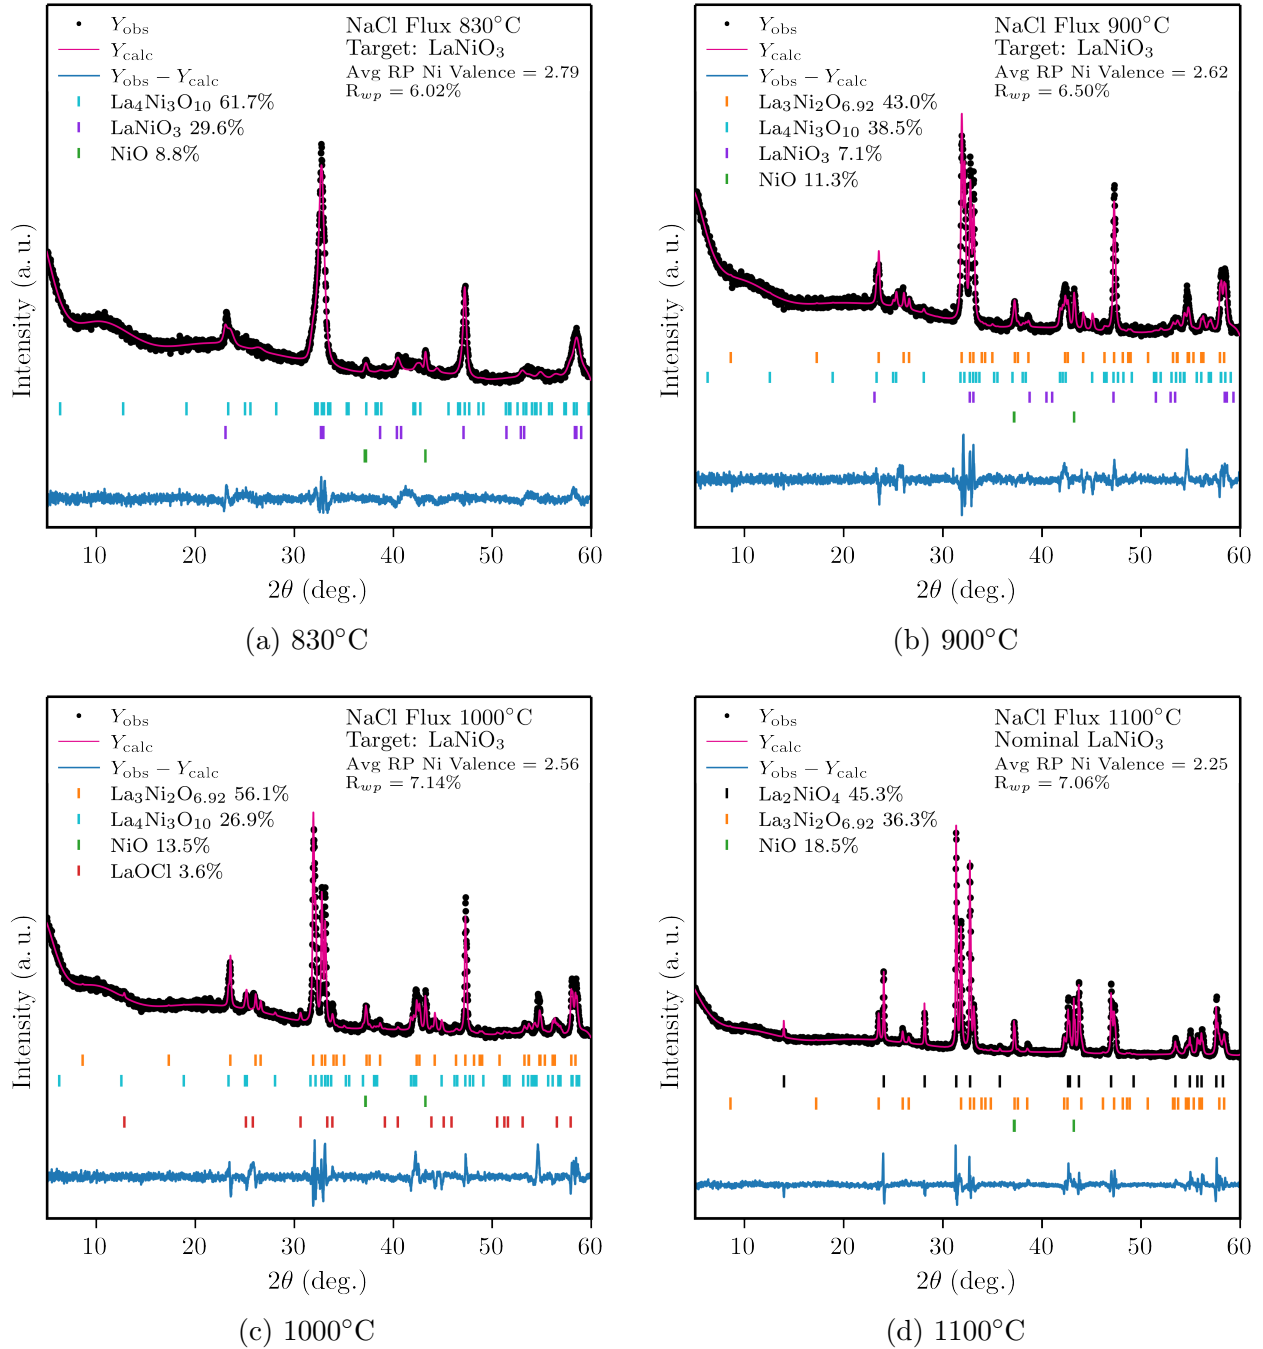

Figure 10: PXRD and Rietveld refinements of targeted  $\text{LaNiO}_3$  where  $\frac{\text{Ni}}{\text{Ni+La}} = 0.5$  in NaCl flux at (a) 830°C, (b) 900°C, (c) 1000°C, and (d) 1100°C.

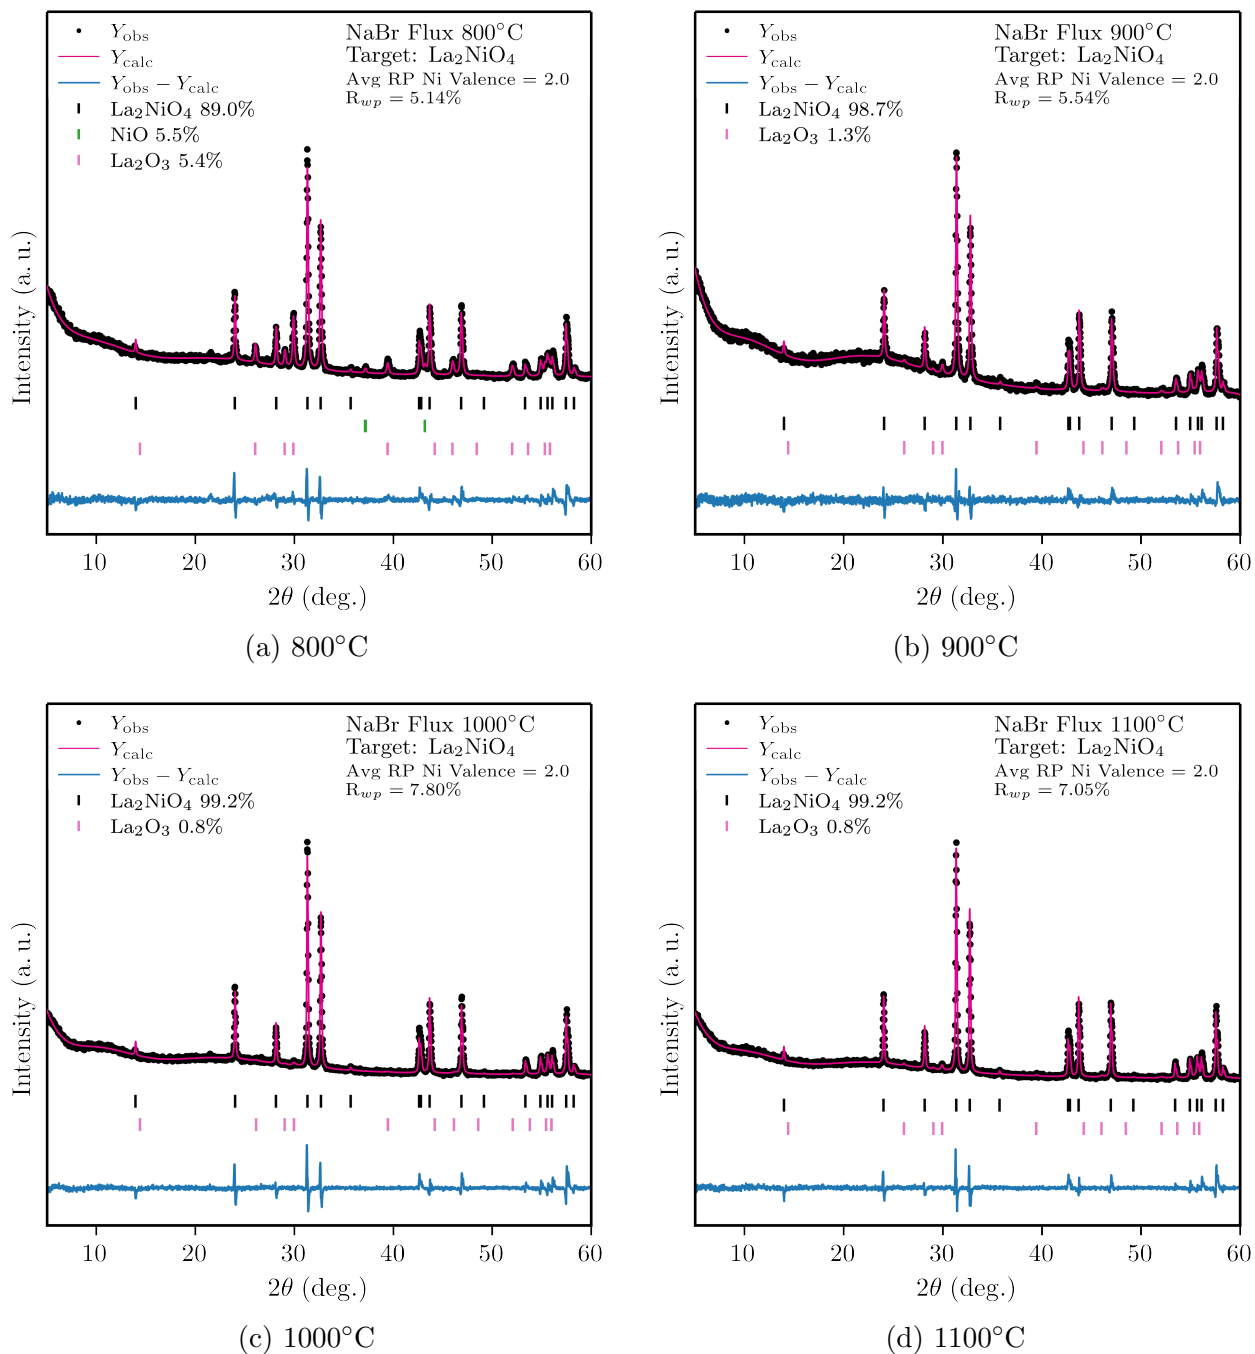

Figure 11: PXRd and Rietveld refinements of targeted  $\text{La}_2\text{NiO}_4$  where  $\frac{\text{Ni}}{\text{Ni}+\text{La}} = 0.33$  in NaBr flux at (a) 800°C, (b) 900°C, (c) 1000°C, and (d) 1100°C.

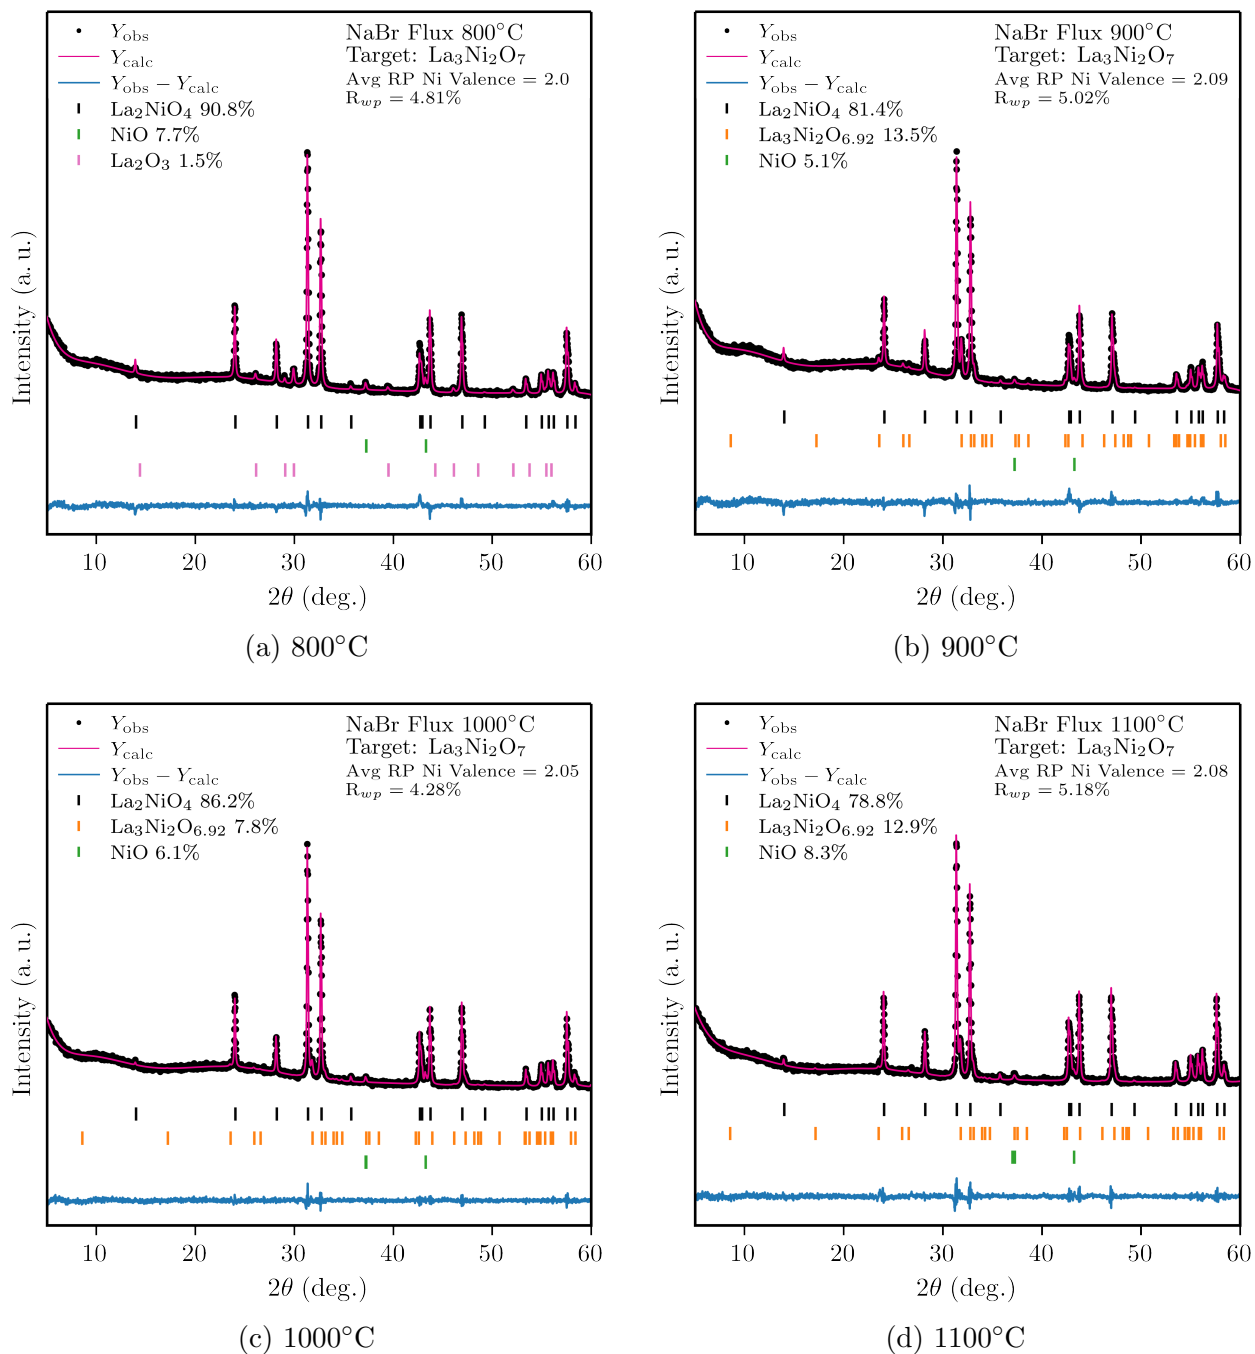

Figure 12: PXRd and Rietveld refinements of targeted  $\text{La}_3\text{Ni}_2\text{O}_7$  where  $\frac{\text{Ni}}{\text{Ni}+\text{La}} = 0.40$  in NaBr flux at (a) 800°C, (b) 900°C, (c) 1000°C, and (d) 1100°C.

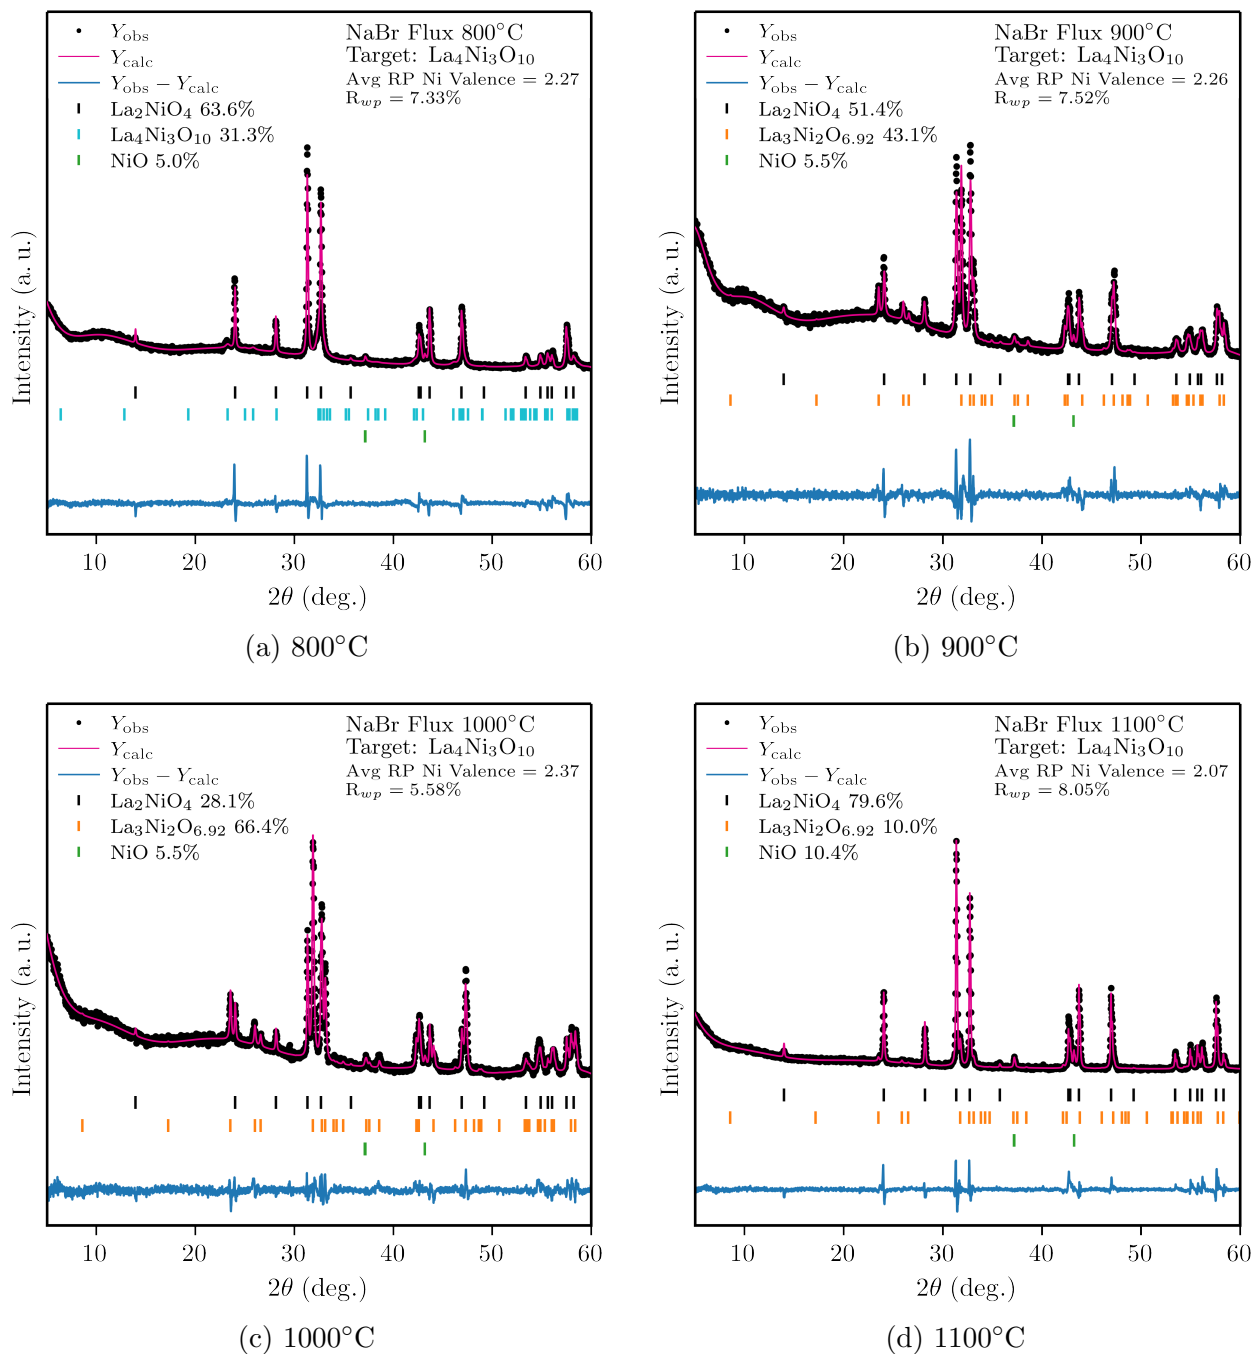

Figure 13: PXRd and Rietveld refinements of targeted  $\text{La}_4\text{Ni}_3\text{O}_{10}$  where  $\frac{\text{Ni}}{\text{Ni}+\text{La}} = 0.43$  in NaBr flux at (a) 800°C, (b) 900°C, (c) 1000°C, and (d) 1100°C.

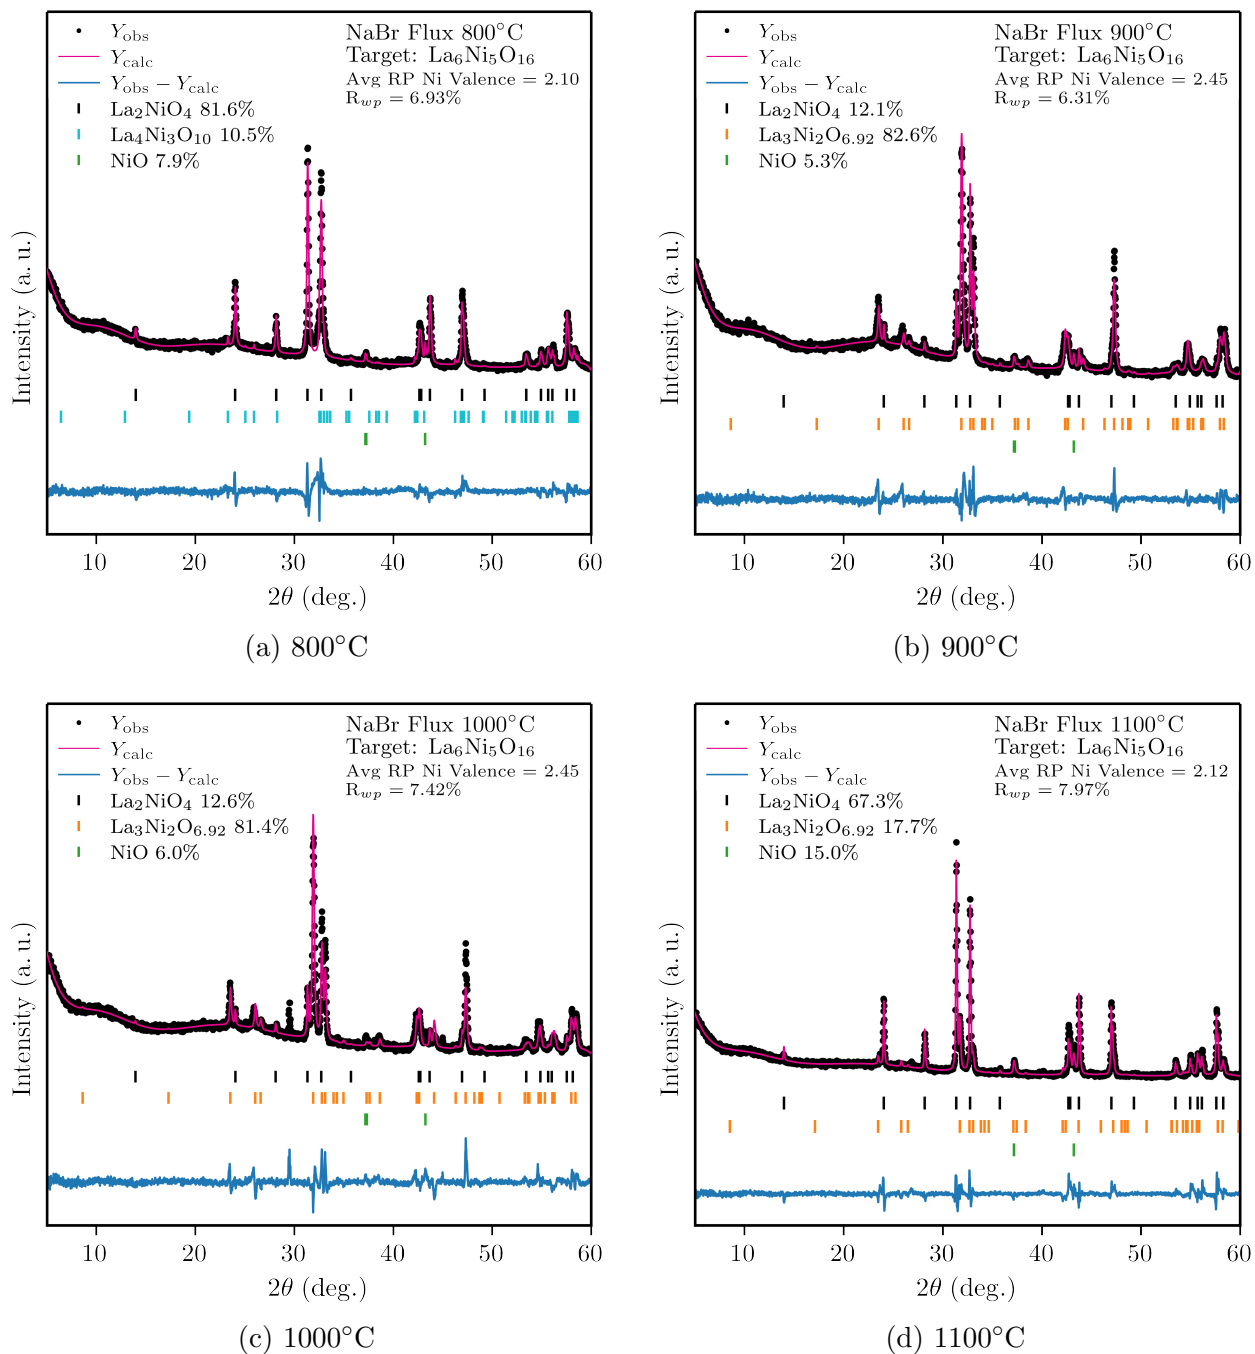

Figure 14: PXRD and Rietveld refinements of targeted  $\text{La}_6\text{Ni}_5\text{O}_{16}$  where  $\frac{\text{Ni}}{\text{Ni}+\text{La}} = 0.454$  in NaBr flux at (a) 800°C, (b) 900°C, (c) 1000°C, and (d) 1100°C.

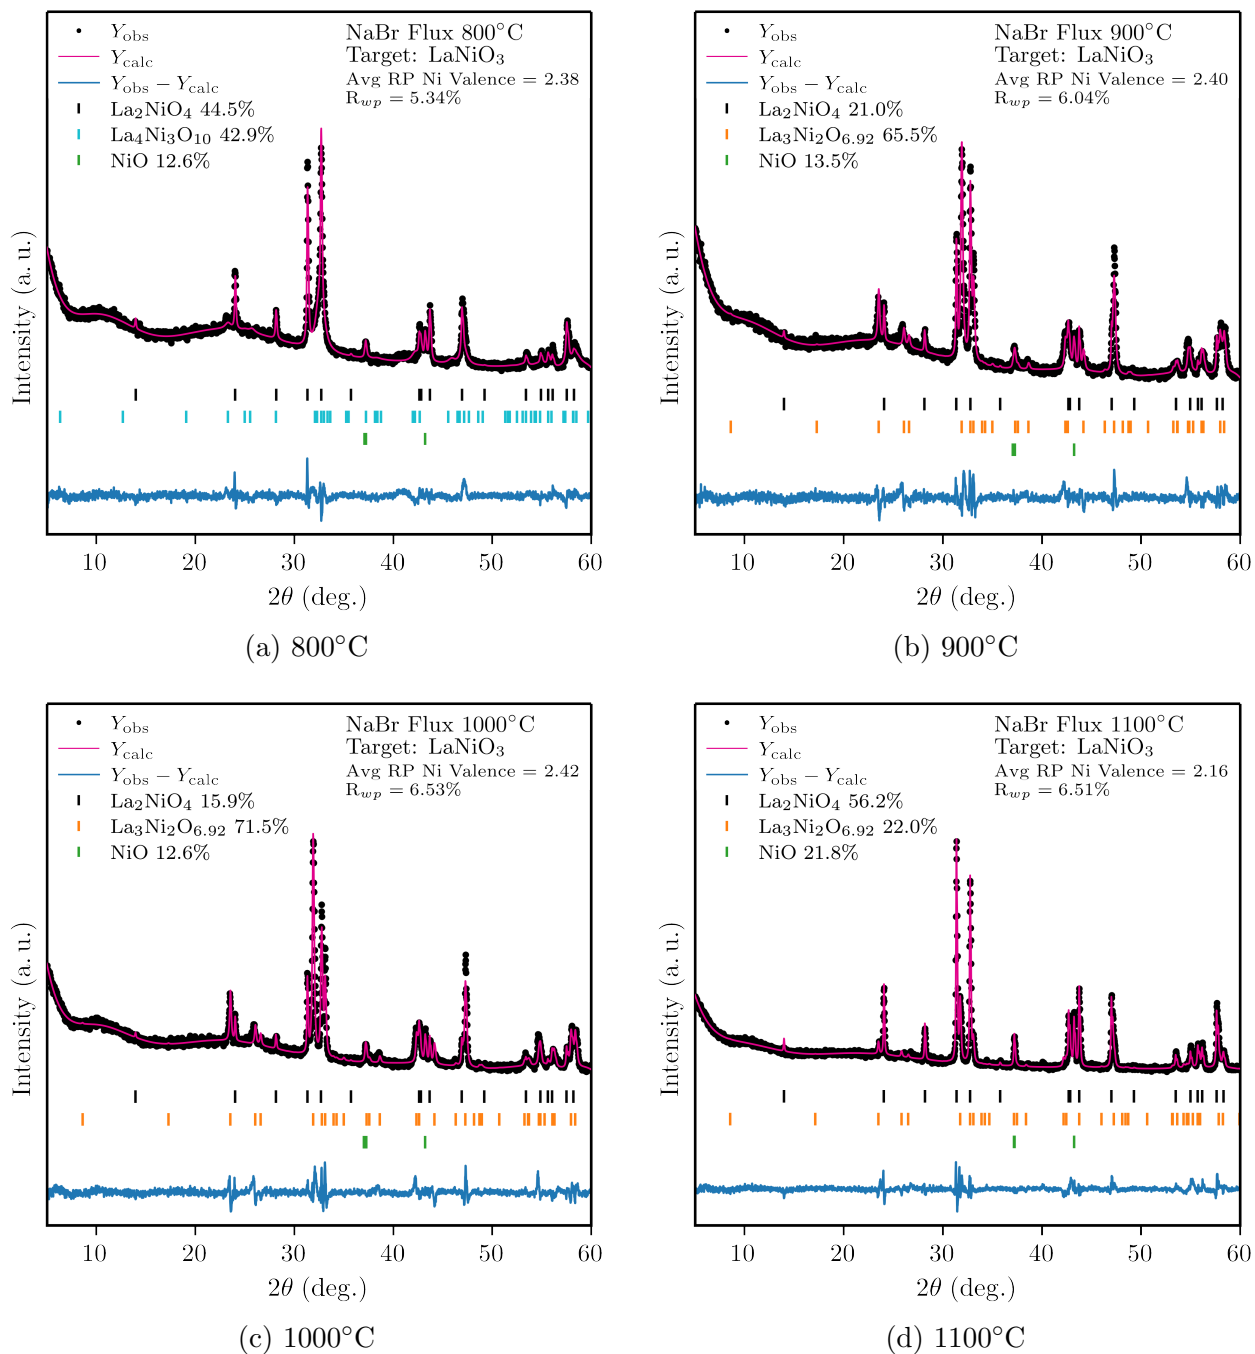

Figure 15: PXRD and Rietveld refinements of targeted  $\text{LaNiO}_3$  where  $\frac{\text{Ni}}{\text{Ni}+\text{La}} = 0.5$  in NaBr flux at (a) 800°C, (b) 900°C, (c) 1000°C, and (d) 1100°C.

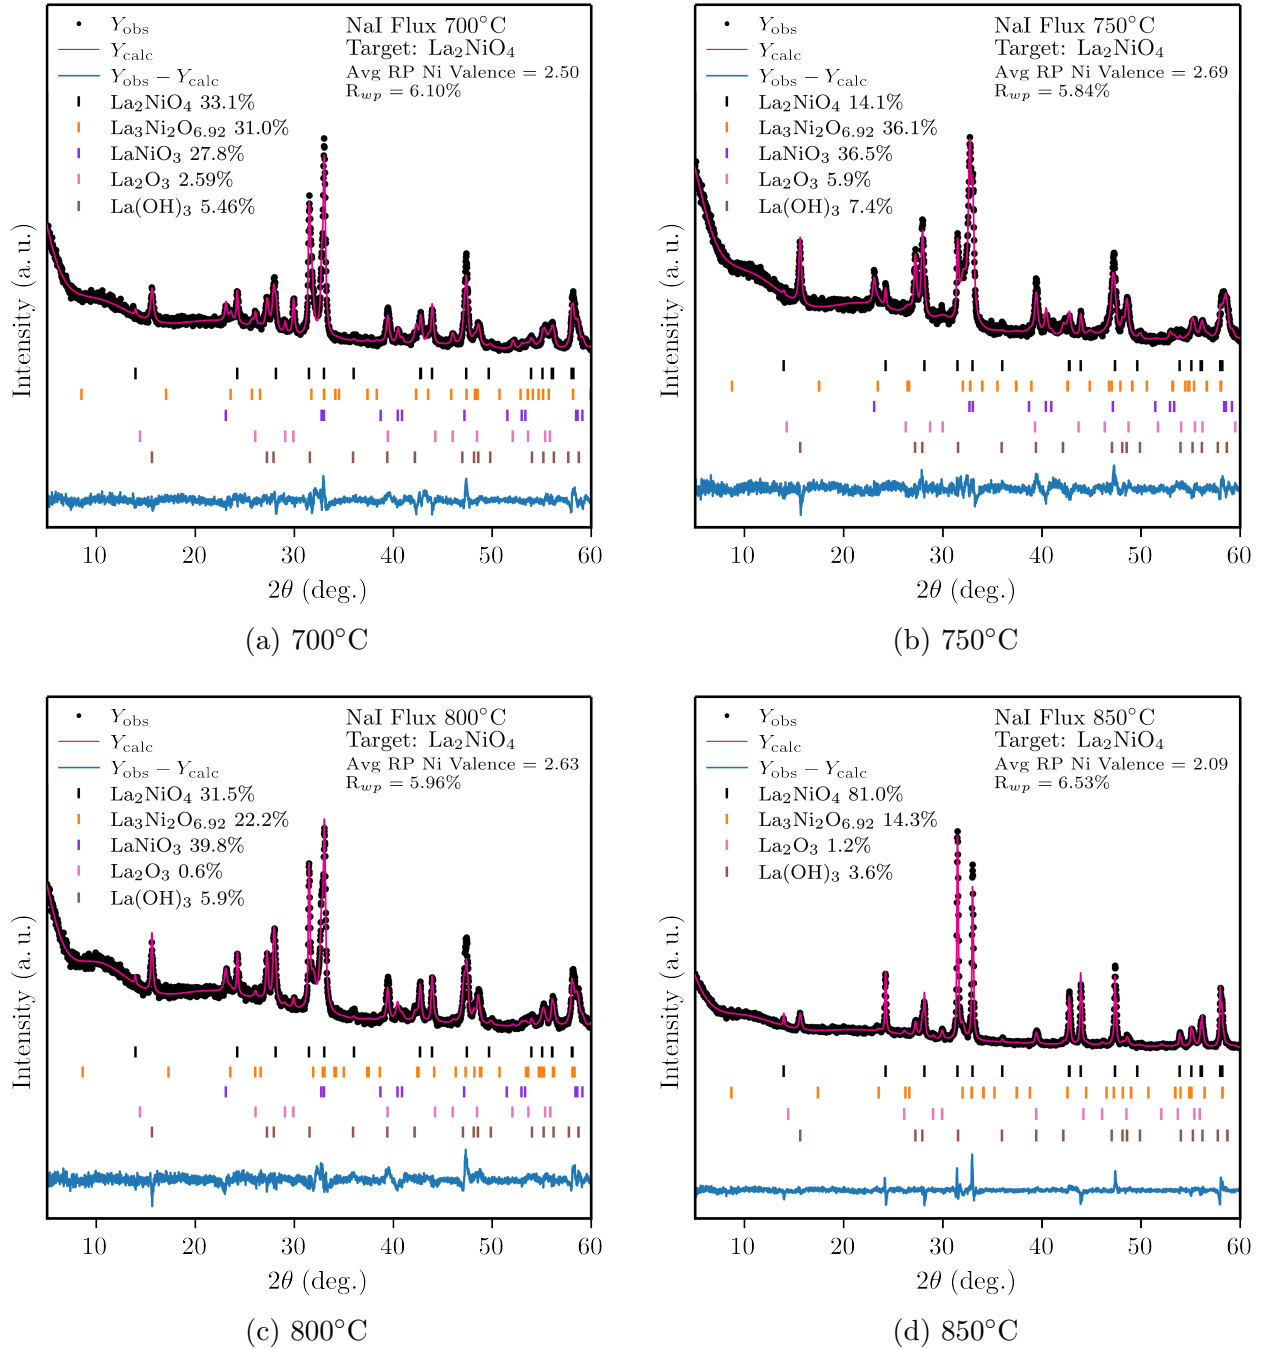

Figure 16: PXRD and Rietveld refinements of targeted  $\text{La}_2\text{NiO}_4$  where  $\frac{\text{Ni}}{\text{Ni}+\text{La}} = 0.33$  in NaI flux at (a) 700°C, (b) 750°C, (c) 800°C, and (d) 850°C.

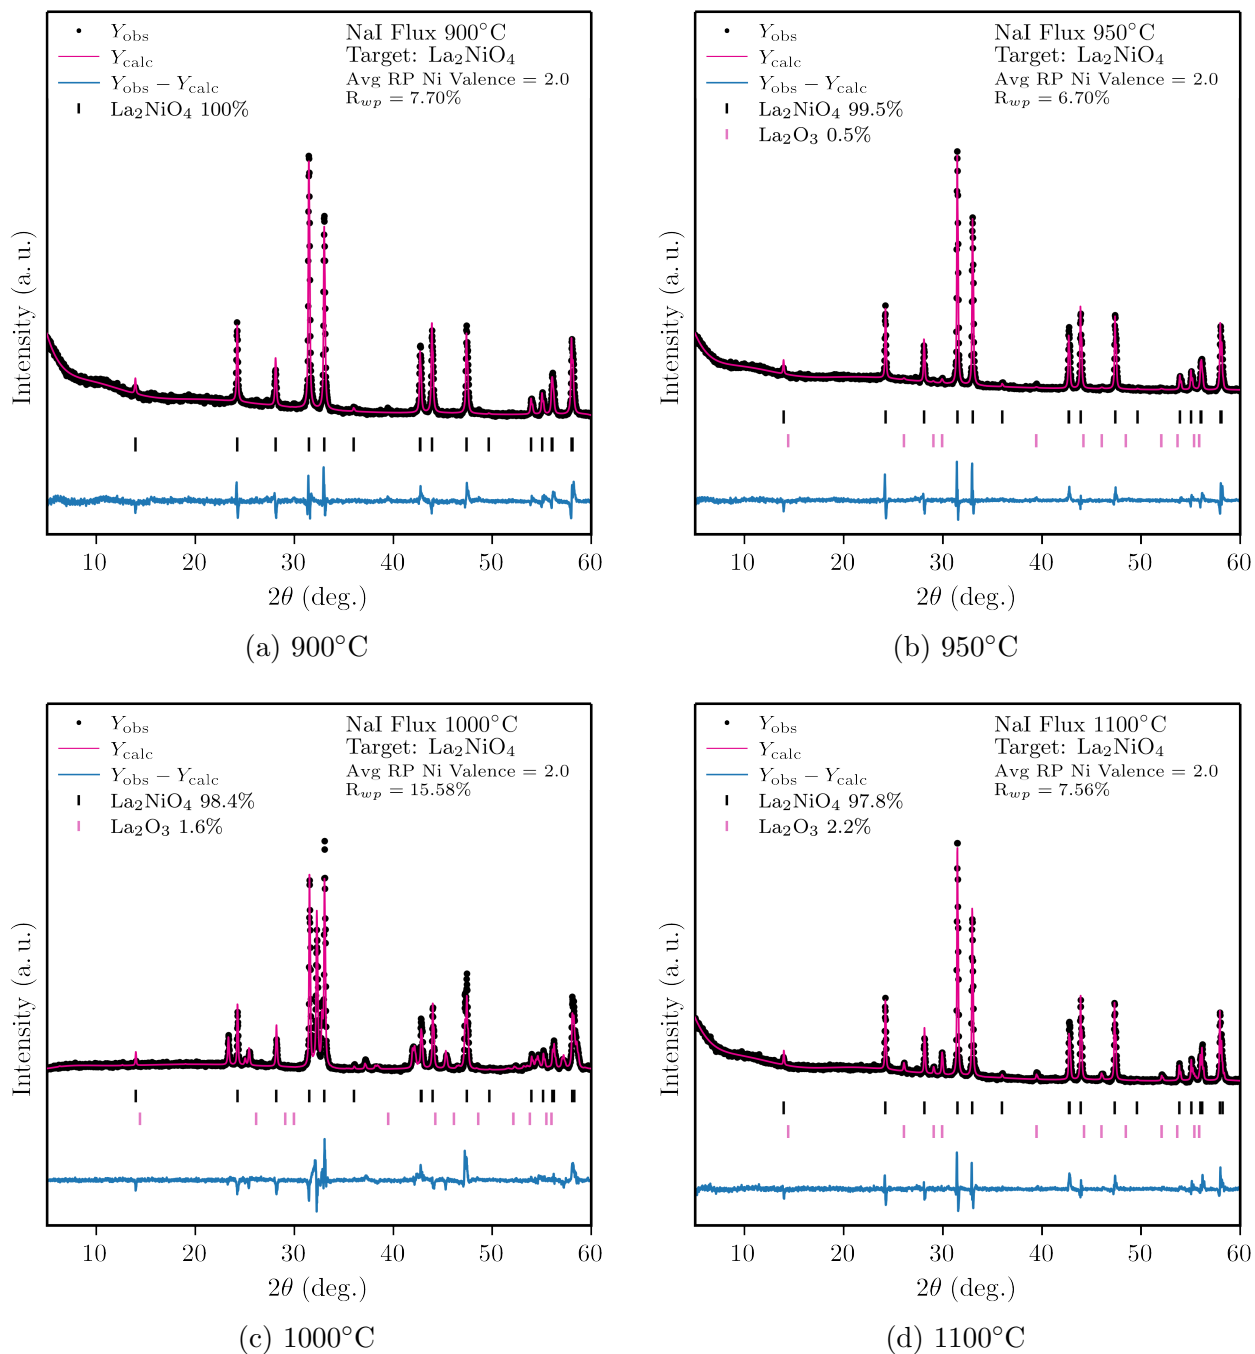

Figure 17: PXRd and Rietveld refinements of targeted  $\text{La}_2\text{NiO}_4$  where  $\frac{\text{Ni}}{\text{Ni}+\text{La}} = 0.33$  in NaI flux at (a) 900°C, (b) 950°C, (c) 1000°C, and (d) 1100°C.

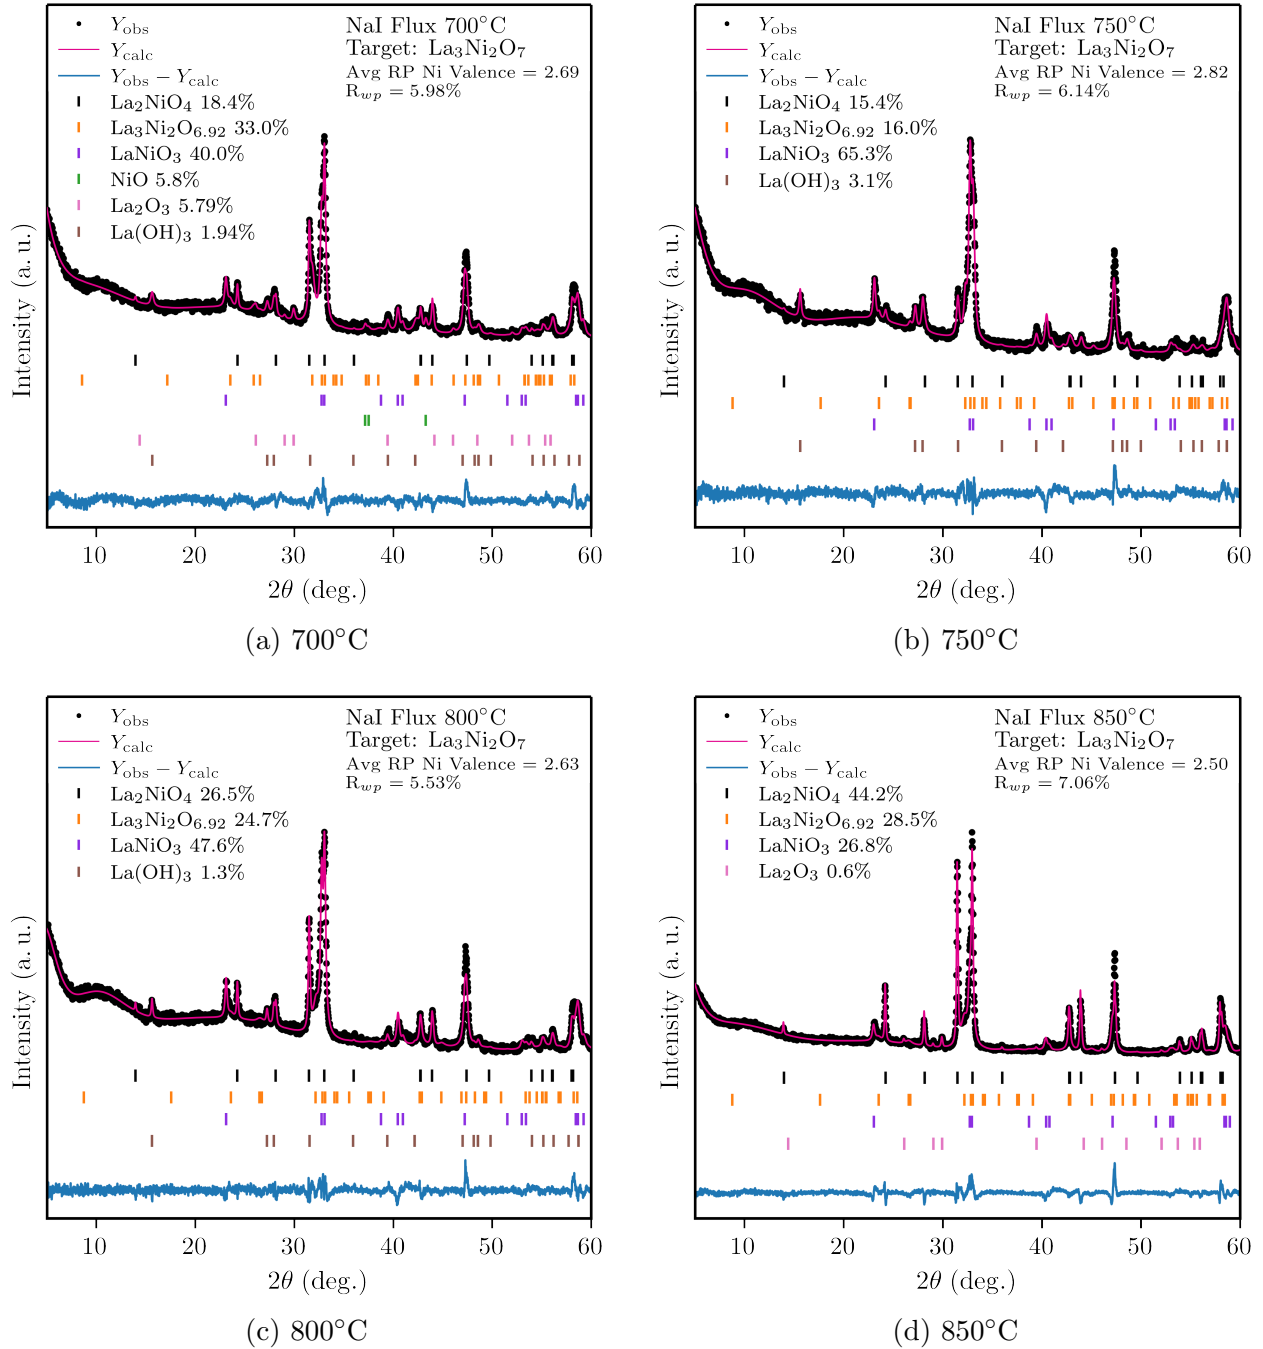

Figure 18: PXR D and Rietveld refinements of targeted  $\text{La}_3\text{Ni}_2\text{O}_7$  where  $\frac{\text{Ni}}{\text{Ni}+\text{La}} = 0.40$  in NaI flux at (a) 700°C, (b) 750°C, (c) 800°C, and (d) 850°C.

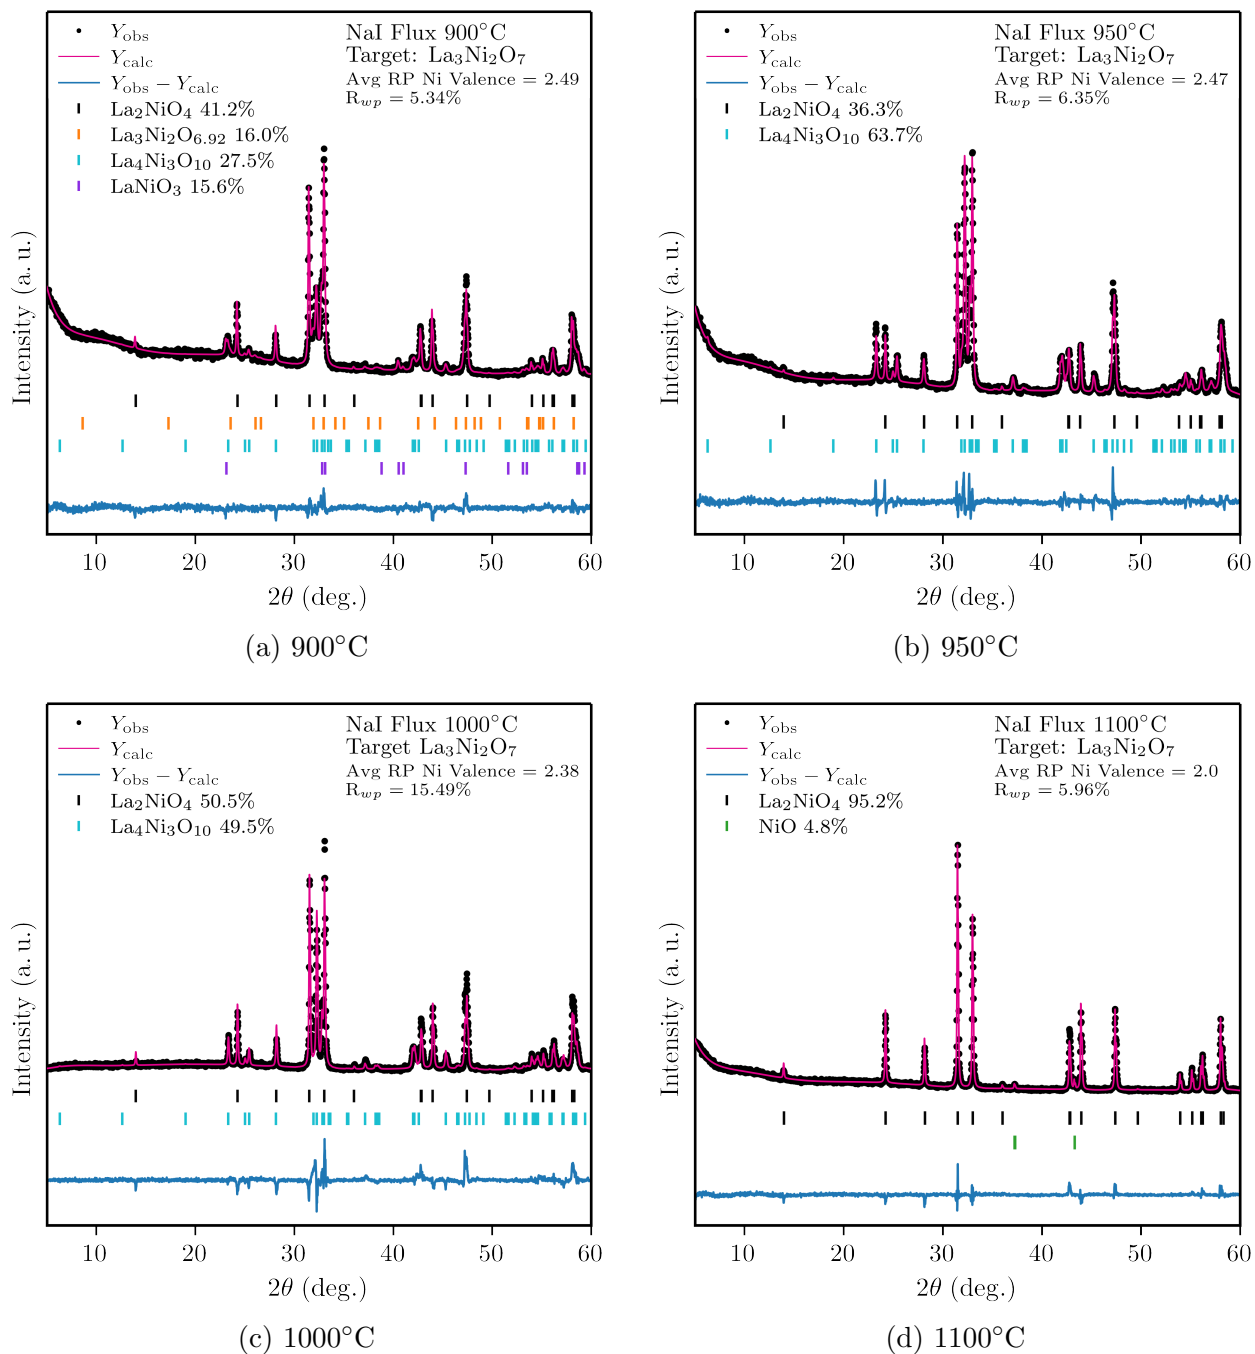

Figure 19: PXRd and Rietveld refinements of targeted  $\text{La}_3\text{Ni}_2\text{O}_7$  where  $\frac{\text{Ni}}{\text{Ni+La}}} = 0.40$  in NaI flux at (a) 900°C, (b) 950°C, (c) 1000°C, and (d) 1100°C.

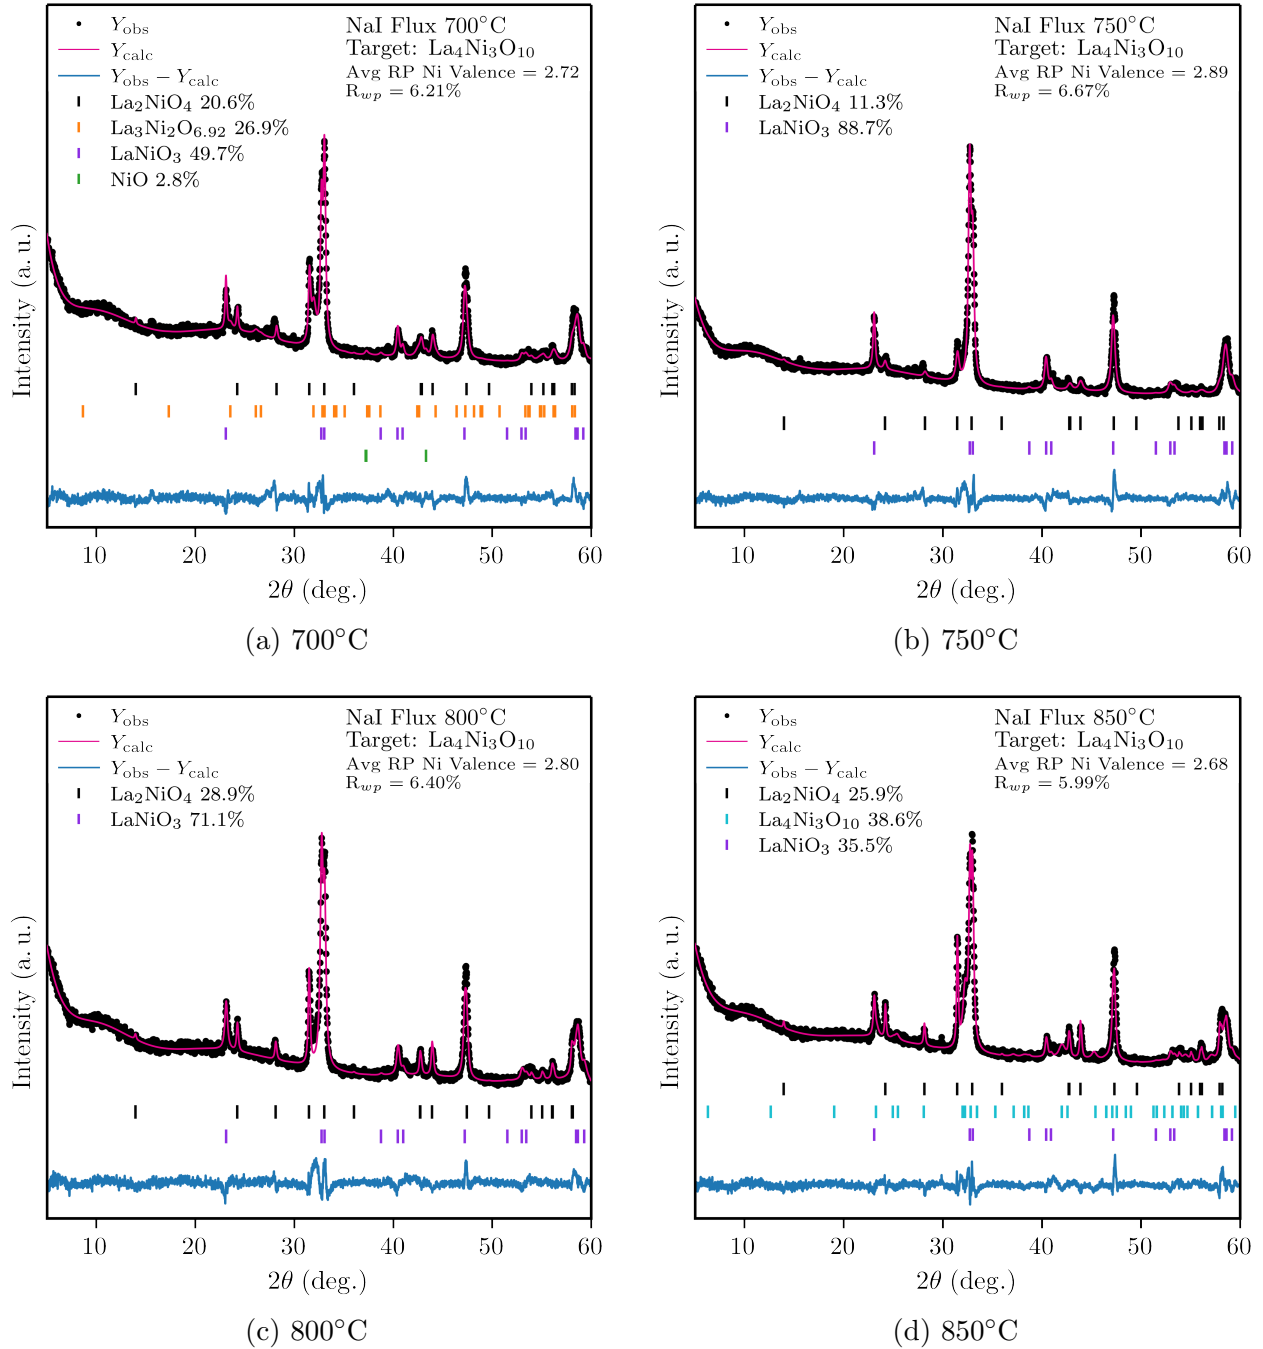

Figure 20: PXRd and Rietveld refinements of targeted  $\text{La}_4\text{Ni}_3\text{O}_{10}$  where  $\frac{\text{Ni}}{\text{Ni}+\text{La}} = 0.43$  in NaI flux at (a) 700°C, (b) 750°C, (c) 800°C, and (d) 850°C.

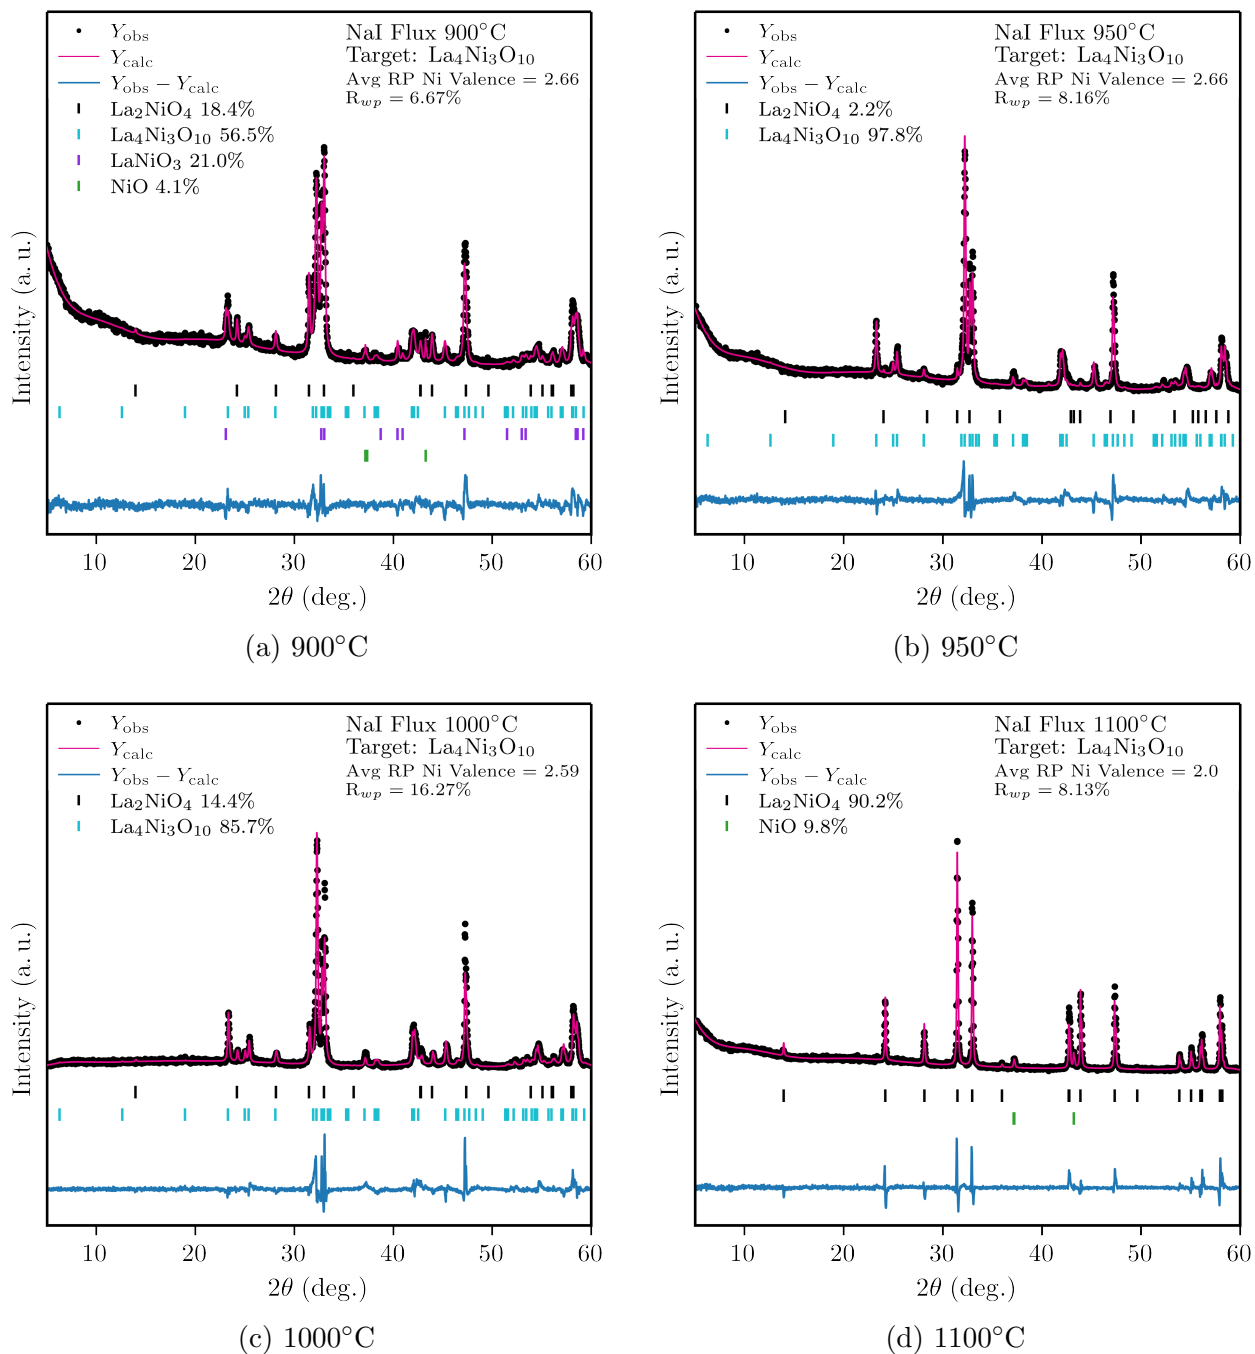

Figure 21: PXRd and Rietveld refinements of targeted  $\text{La}_4\text{Ni}_3\text{O}_{10}$  where  $\frac{\text{Ni}}{\text{Ni}+\text{La}} = 0.43$  in NaI flux at (a) 900°C, (b) 950°C, (c) 1000°C, and (d) 1100°C.

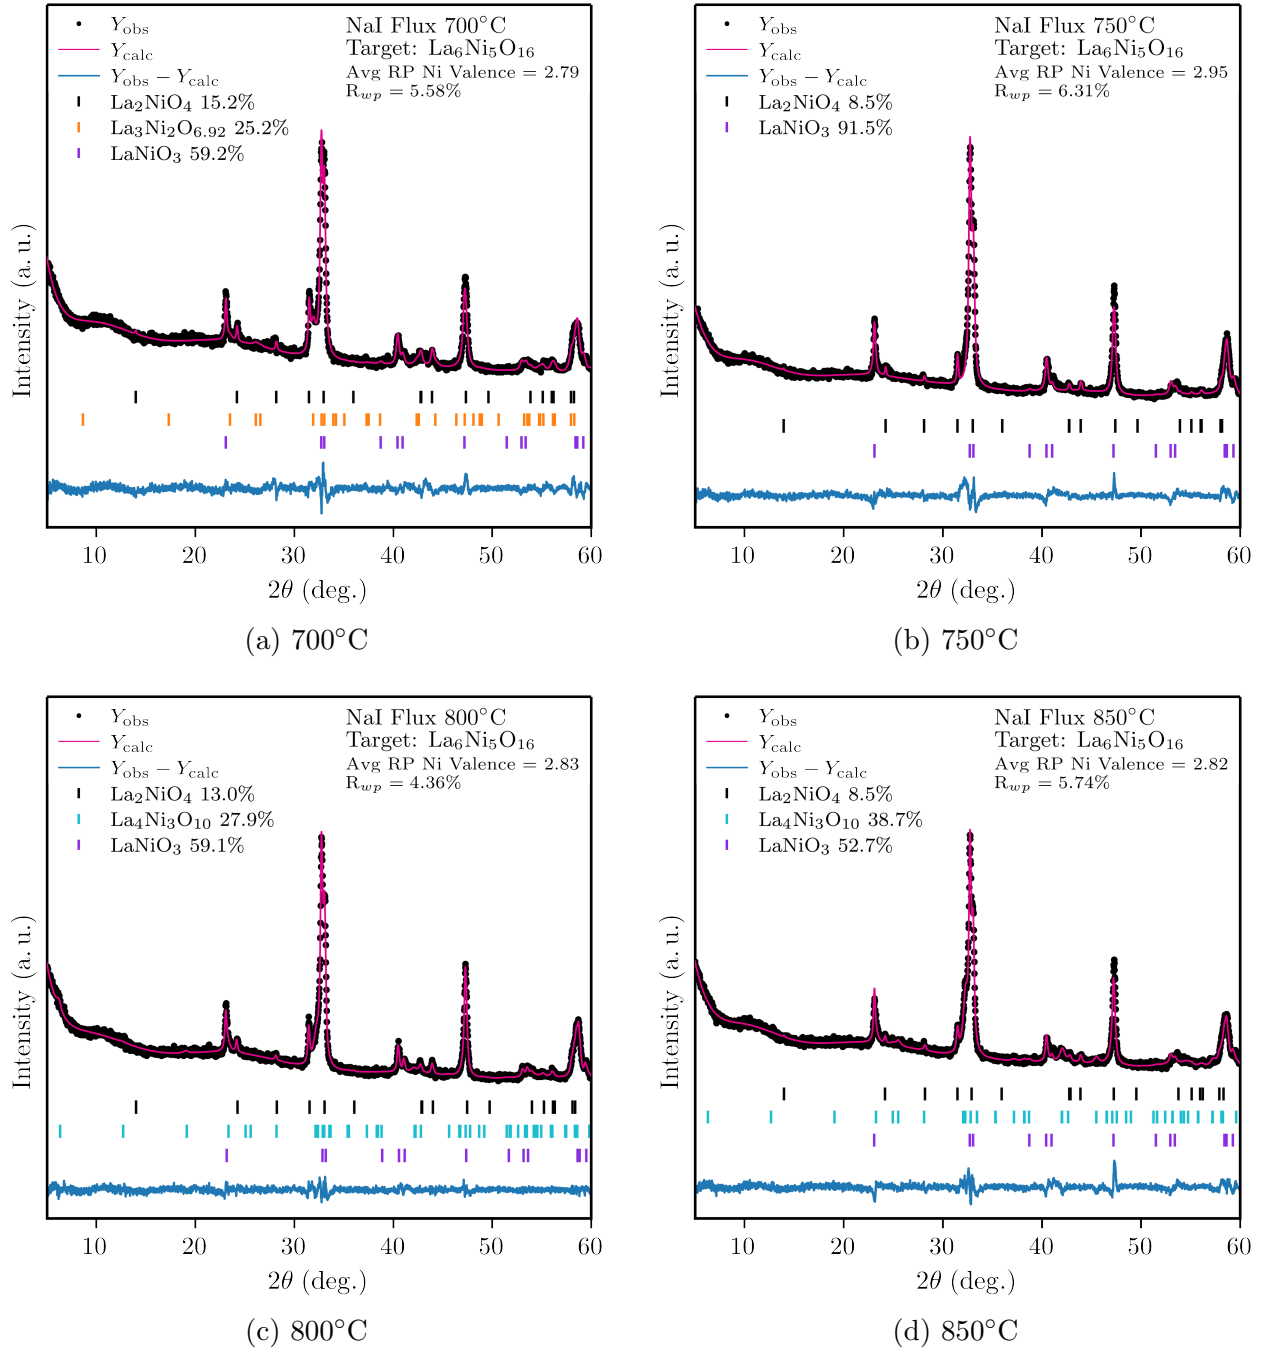

Figure 22: PXRd and Rietveld refinements of targeted  $\text{La}_6\text{Ni}_5\text{O}_{16}$  where  $\frac{\text{Ni}}{\text{Ni}+\text{La}} = 0.454$  in NaI flux at (a) 700°C, (b) 750°C, (c) 800°C, and (d) 850°C.

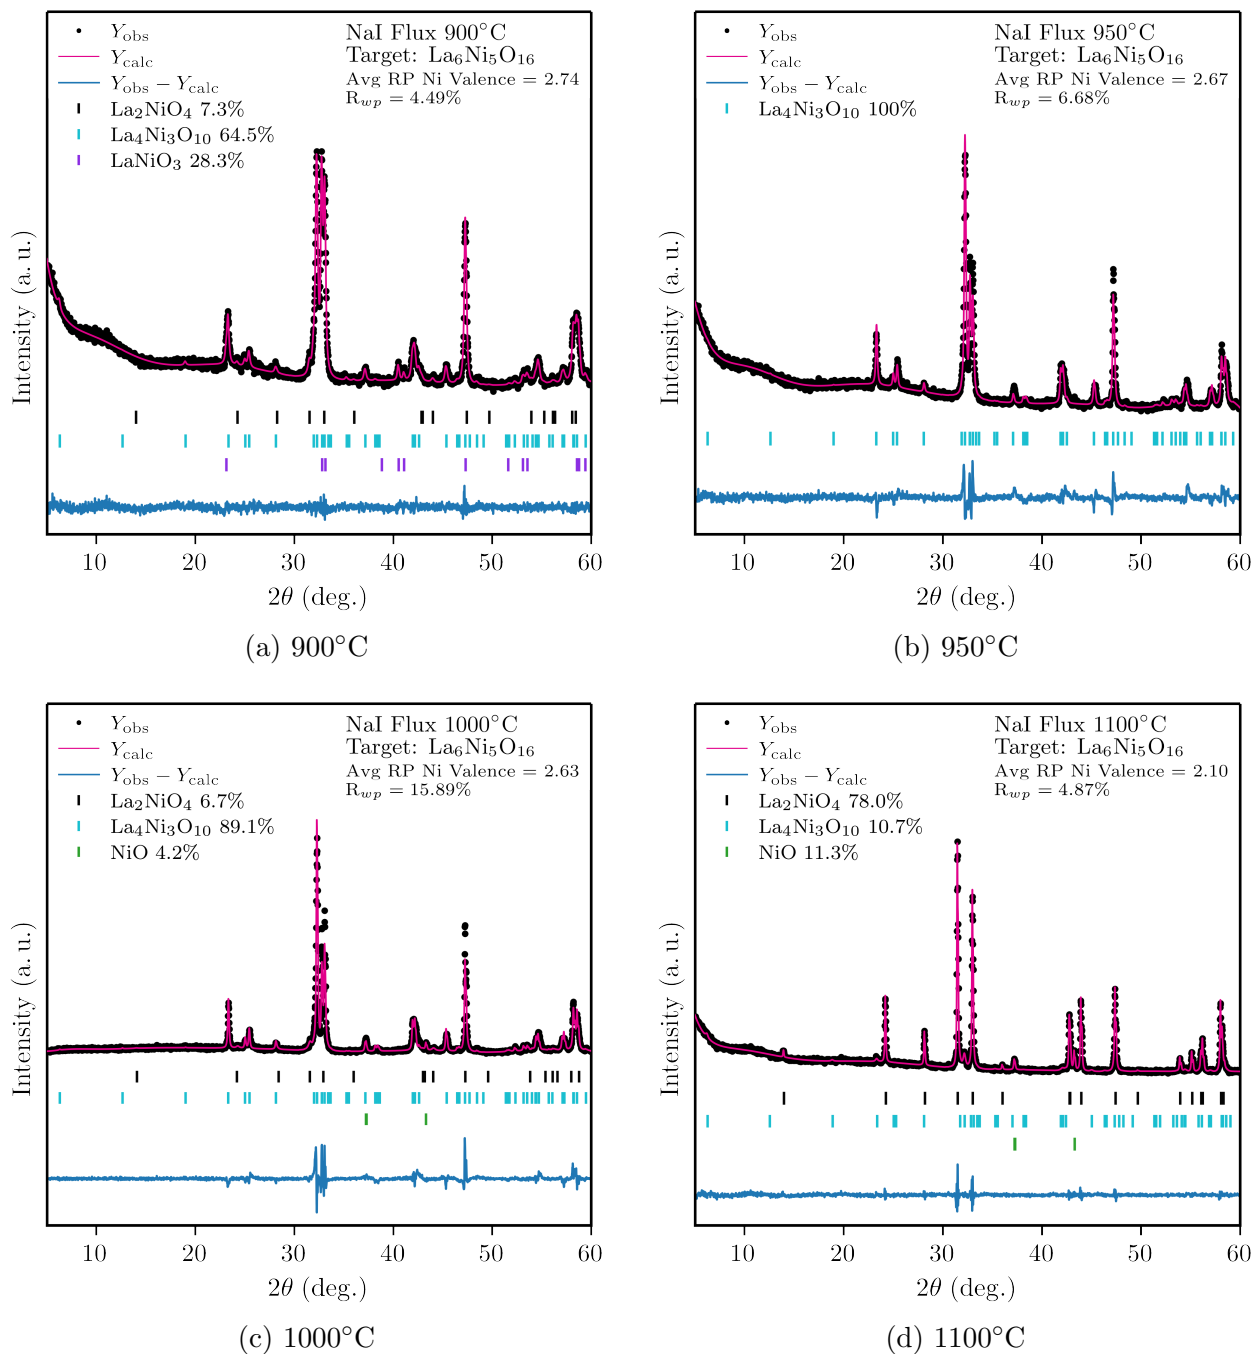

Figure 23: PXRD and Rietveld refinements of targeted  $\text{La}_6\text{Ni}_5\text{O}_{16}$  where  $\frac{\text{Ni}}{\text{Ni}+\text{La}} = 0.454$  in NaI flux at (a) 900°C, (b) 950°C, (c) 1000°C, and (d) 1100°C.

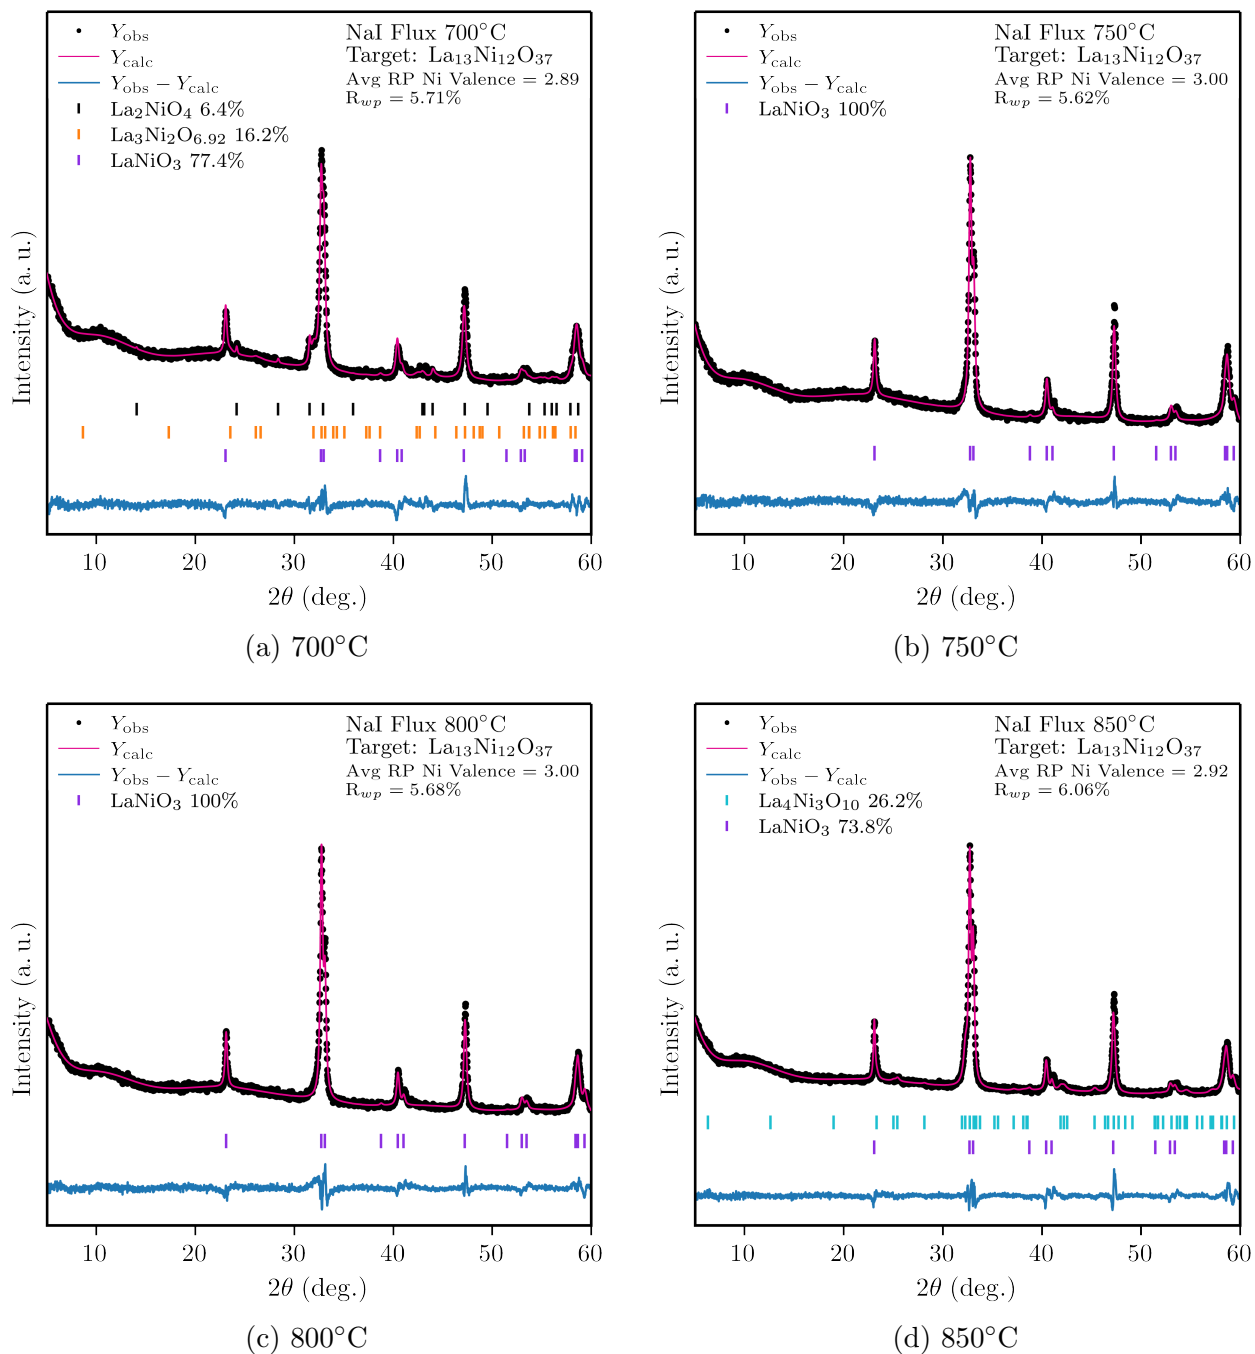

Figure 24: PXRD and Rietveld refinements of targeted  $\text{La}_{13}\text{Ni}_{12}\text{O}_{37}$  where  $\frac{\text{Ni}}{\text{Ni}+\text{La}} = 0.48$  in NaI flux at (a) 700°C, (b) 750°C, (c) 800°C, and (d) 850°C.

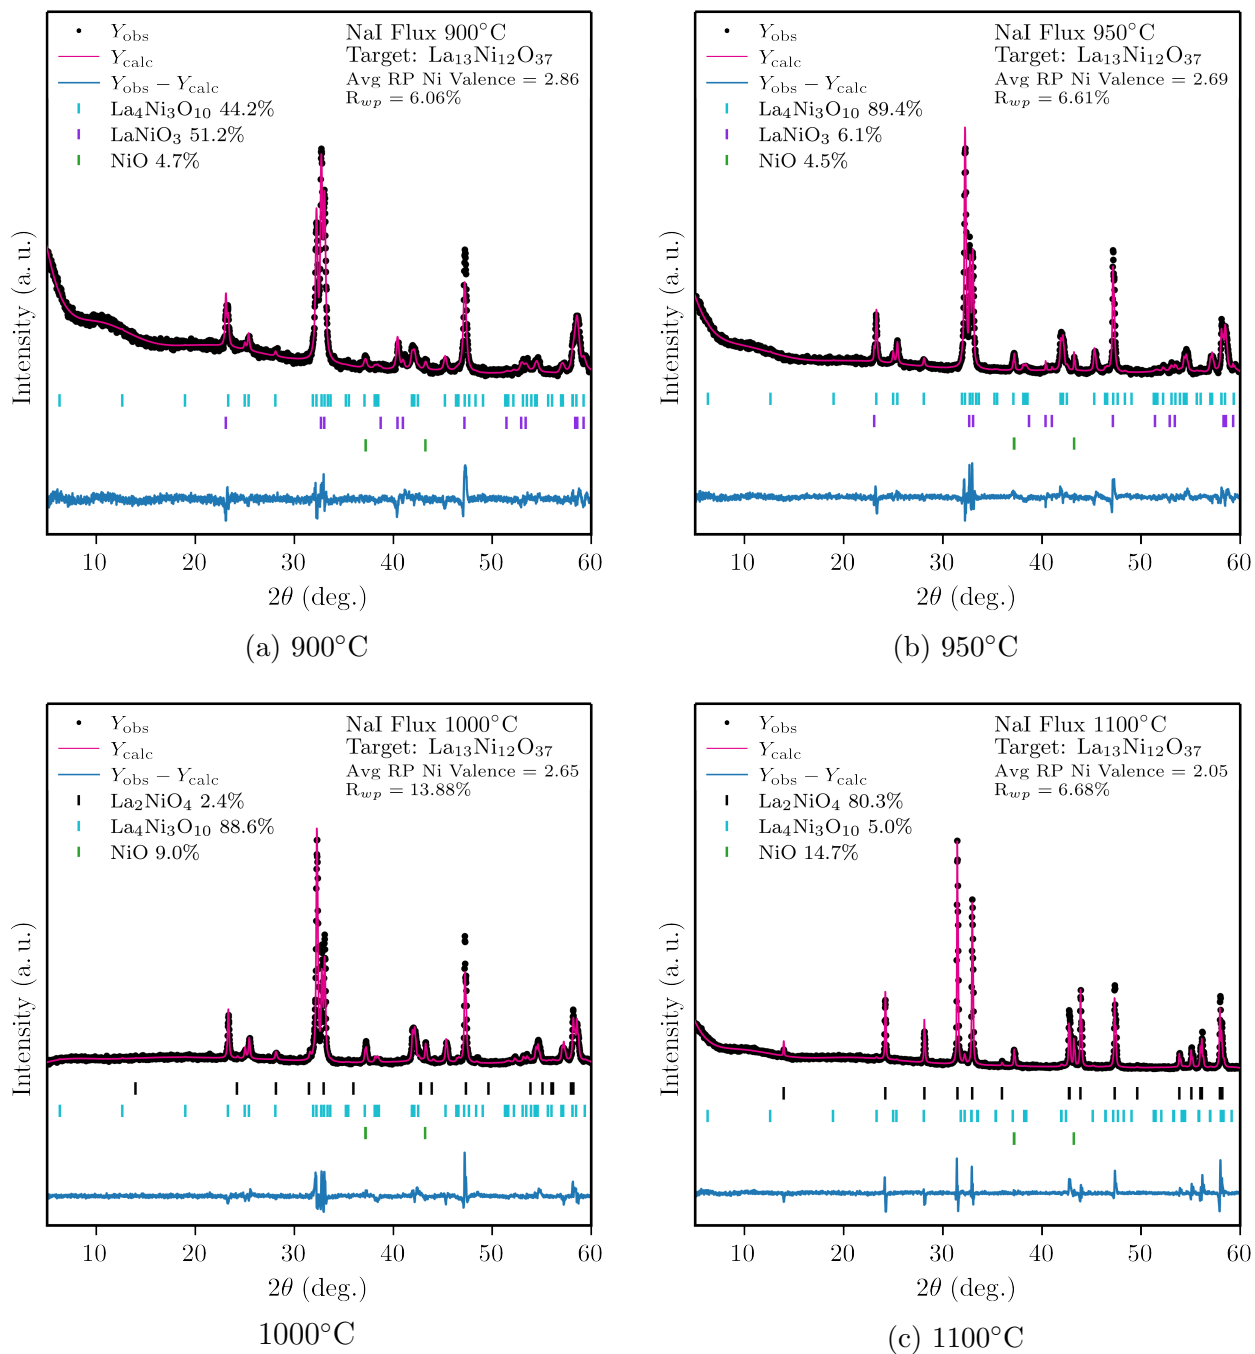

Figure 25: PXRD and Rietveld refinements of targeted  $\text{La}_{13}\text{Ni}_{12}\text{O}_{37}$  where  $\frac{\text{Ni}}{\text{Ni}+\text{La}} = 0.48$  in NaI flux at (a) 900°C, (b) 950°C, (c) 1000°C, and (d) 1100°C.

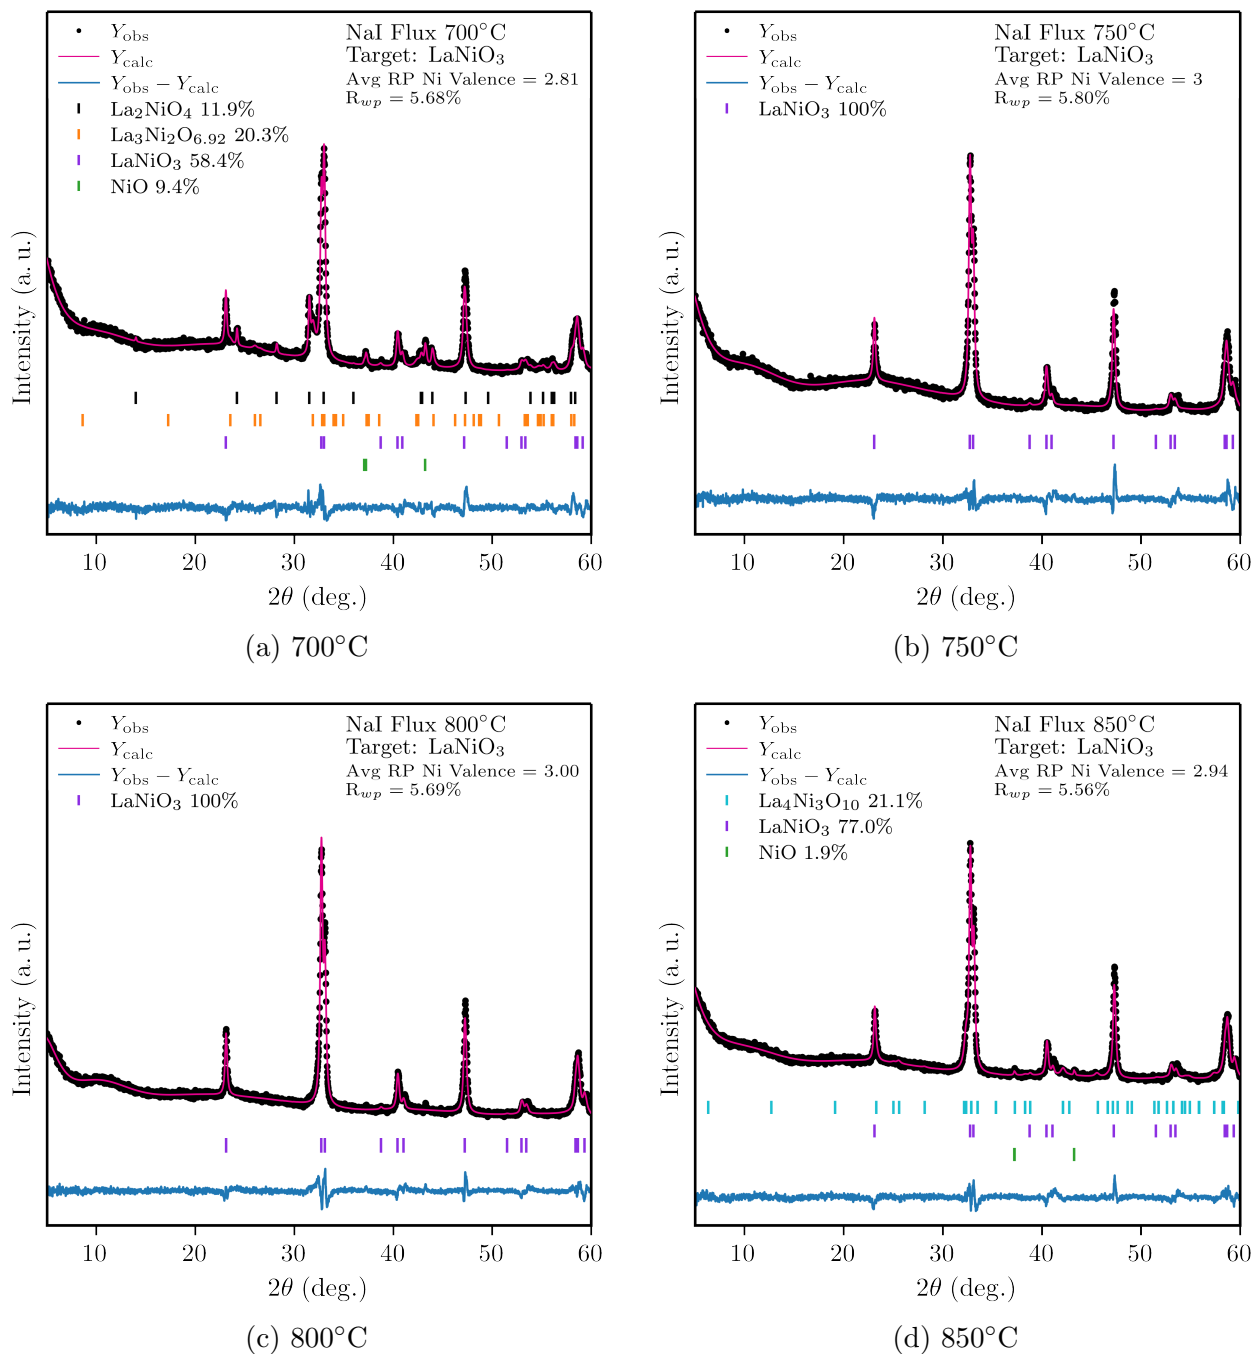

Figure 26: PXRD and Rietveld refinements of targeted  $\text{LaNiO}_3$  where  $\frac{\text{Ni}}{\text{Ni+La}} = 0.5$  in NaI flux at (a) 700°C, (b) 750°C, (c) 800°C, and (d) 850°C.

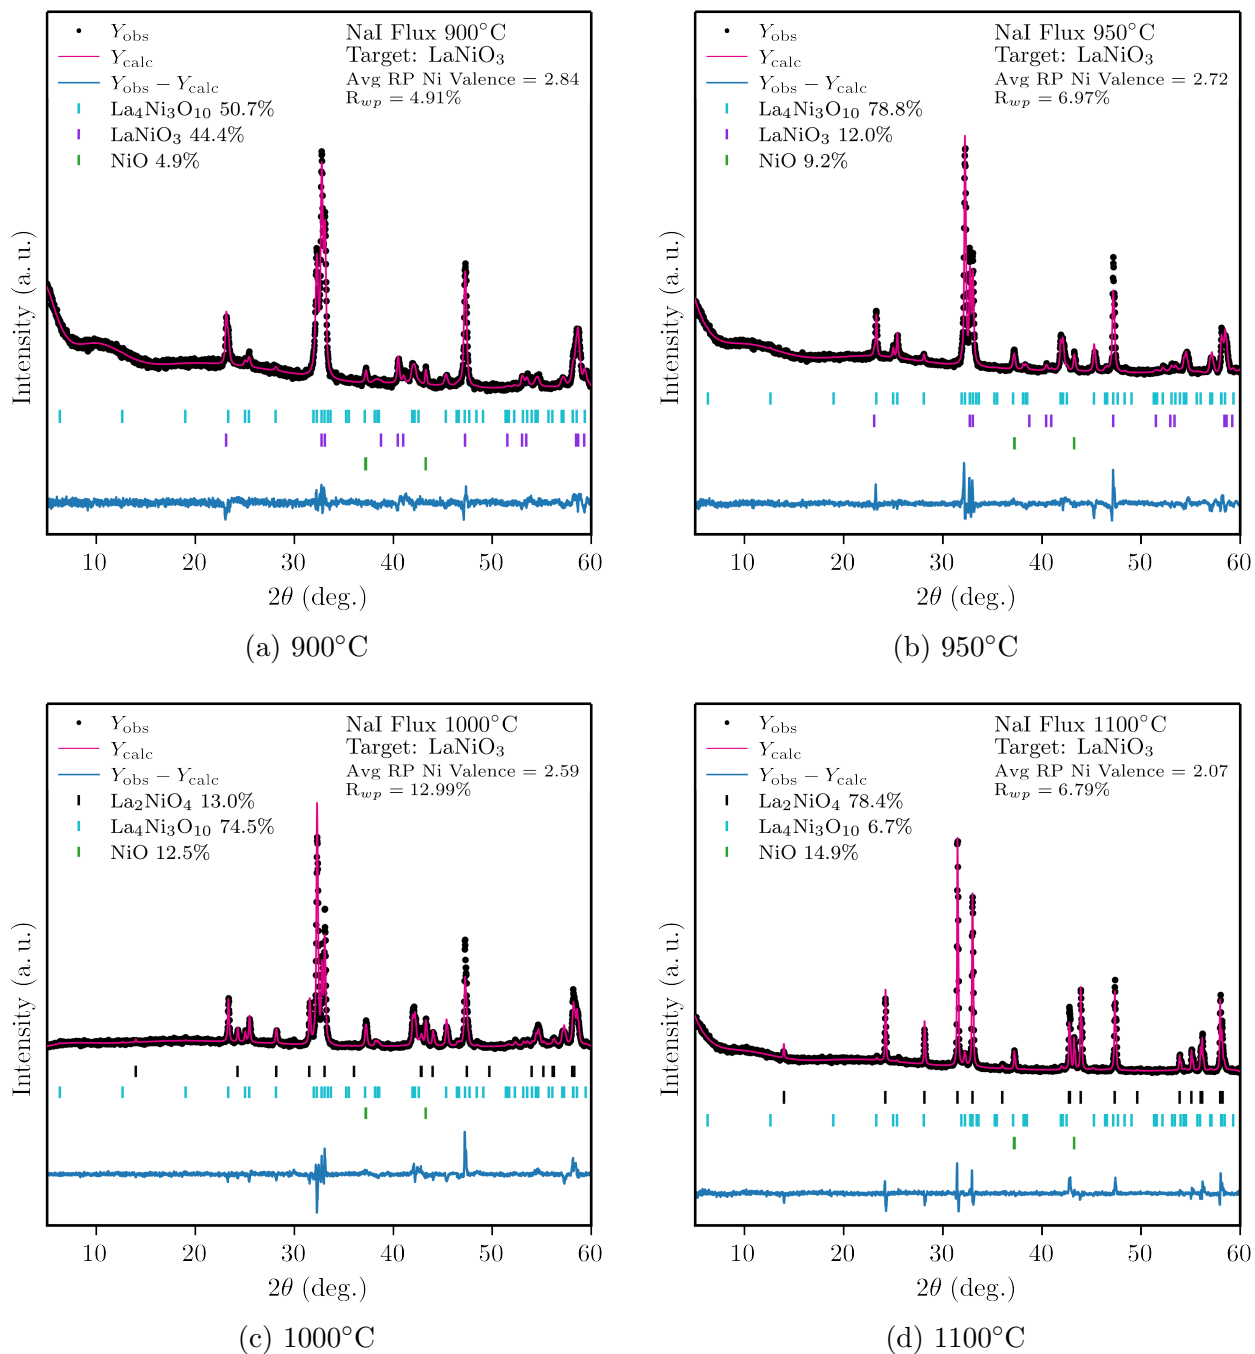

Figure 27: PXRD and Rietveld refinements of targeted  $\text{LaNiO}_3$  where  $\frac{\text{Ni}}{\text{Ni+La}} = 0.5$  in NaI flux at (a) 900°C, (b) 950°C, (c) 1000°C, and (d) 1100°C.

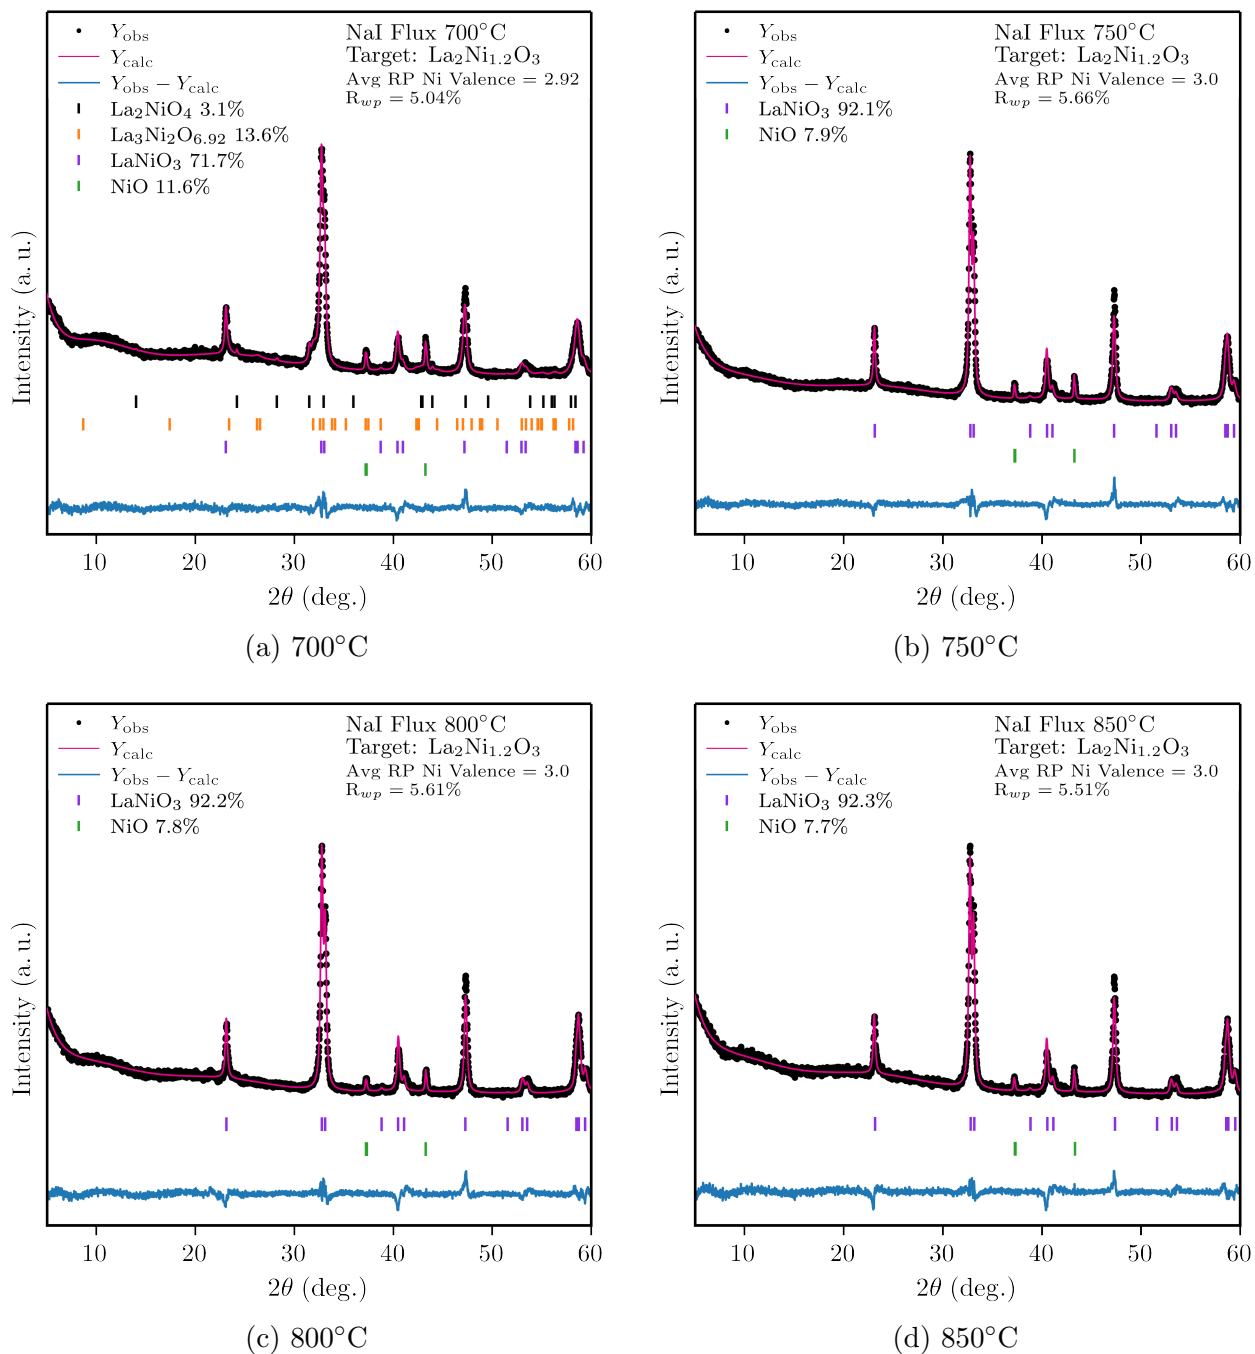

Figure 28: PXRd and Rietveld refinements of targeted  $\text{LaNi}_{1.2}\text{O}_3$  where  $\frac{\text{Ni}}{\text{Ni}+\text{La}} = 0.6$  in NaI flux at (a) 700°C, (b) 750°C, (c) 800°C, and (d) 850°C.

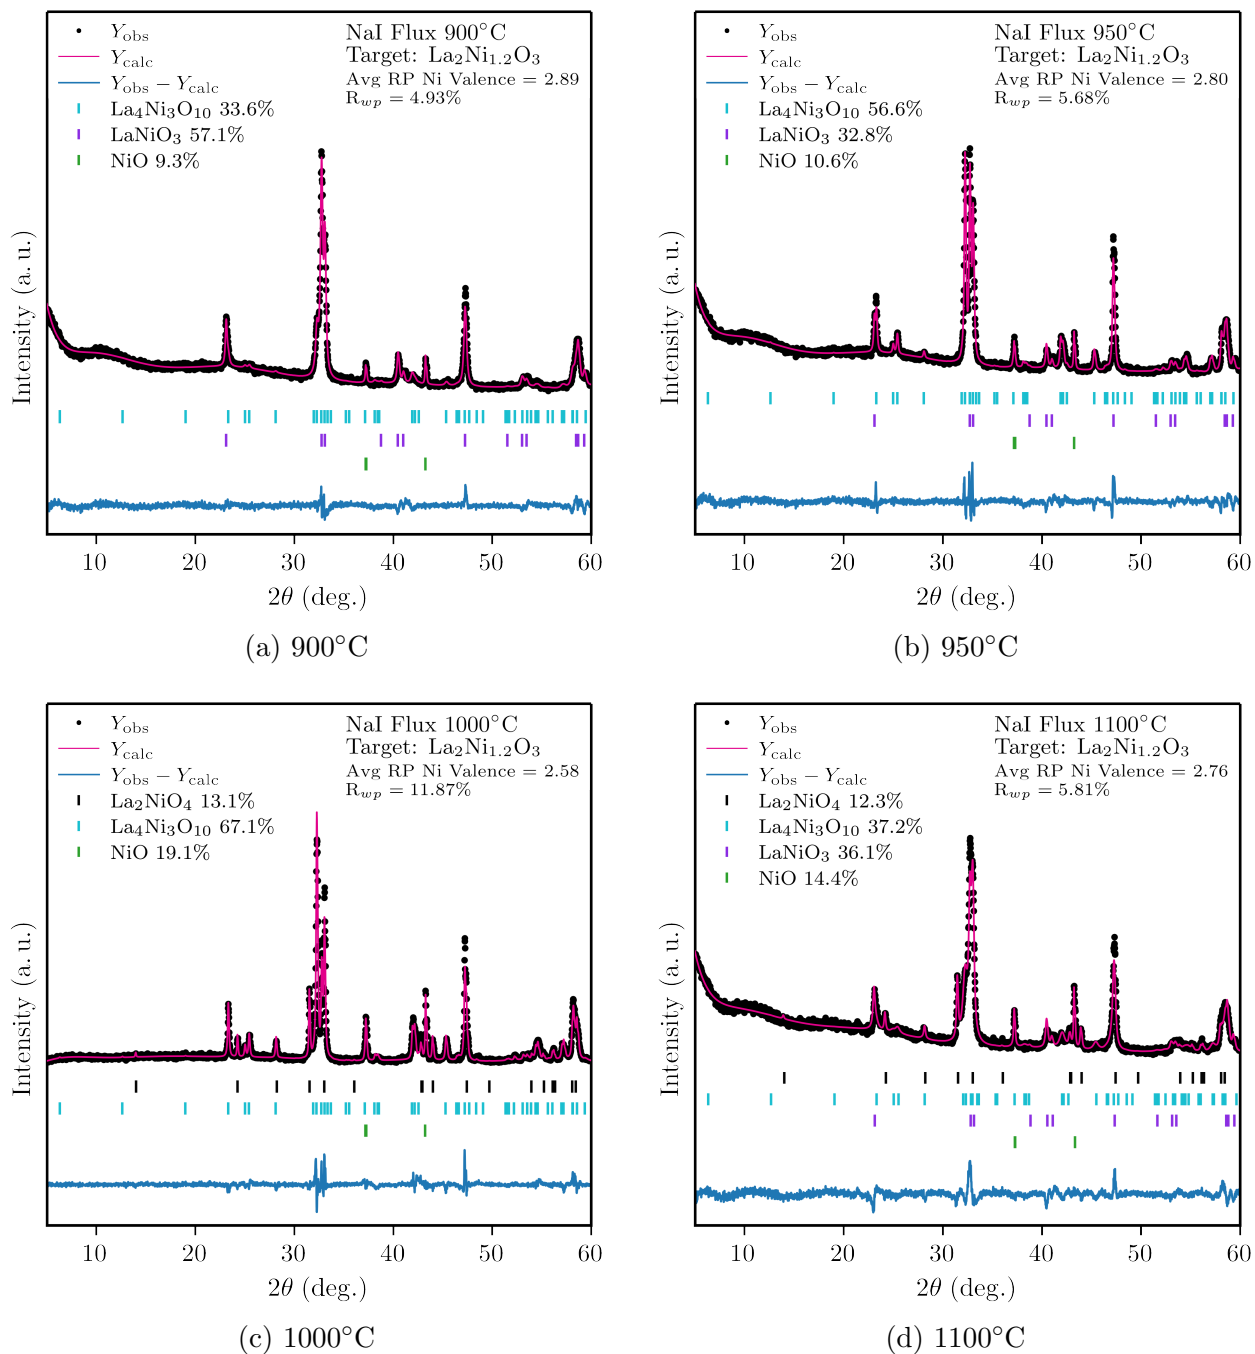

Figure 29: PXRd and Rietveld refinements of targeted  $\text{LaNi}_{1.2}\text{O}_3$  where  $\frac{\text{Ni}}{\text{Ni}+\text{La}} = 0.6$  in NaI flux at (a) 900°C, (b) 950°C, (c) 1000°C, and (d) 1100°C.

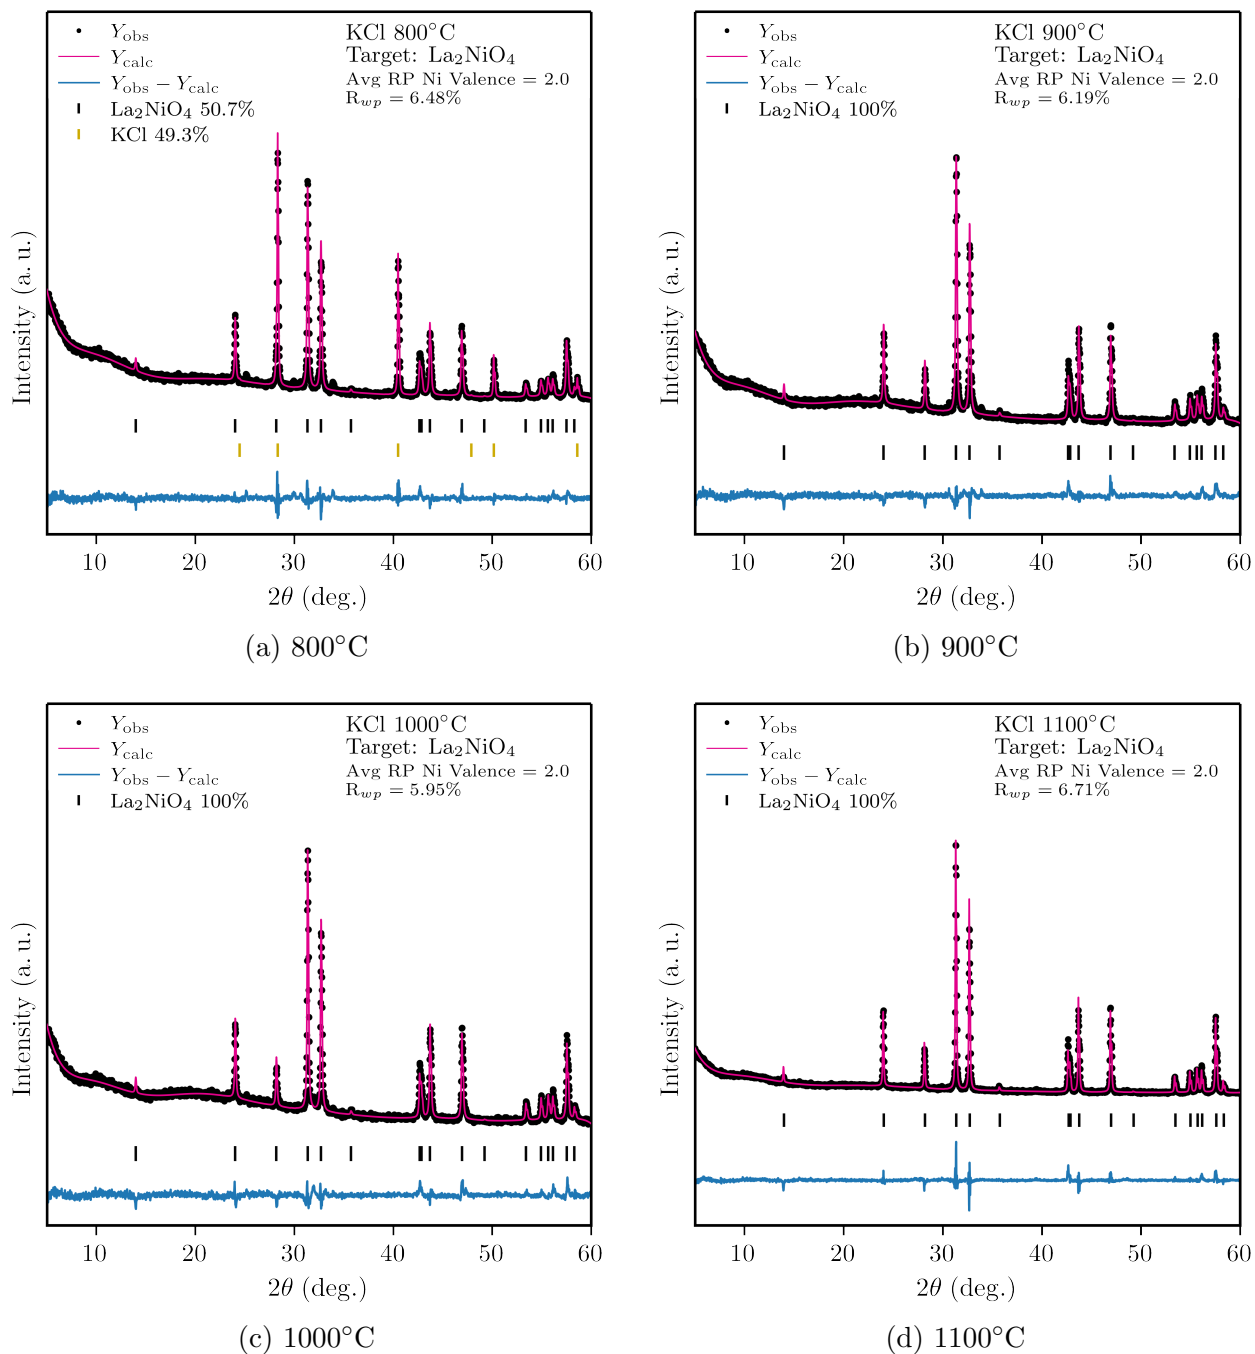

Figure 30: PXRd and Rietveld refinements of targeted  $\text{La}_2\text{NiO}_4$  where  $\frac{\text{Ni}}{\text{Ni}+\text{La}} = 0.33$  in KCl flux at (a) 800°C, (b) 900°C, (c) 1000°C, and (d) 1100°C.

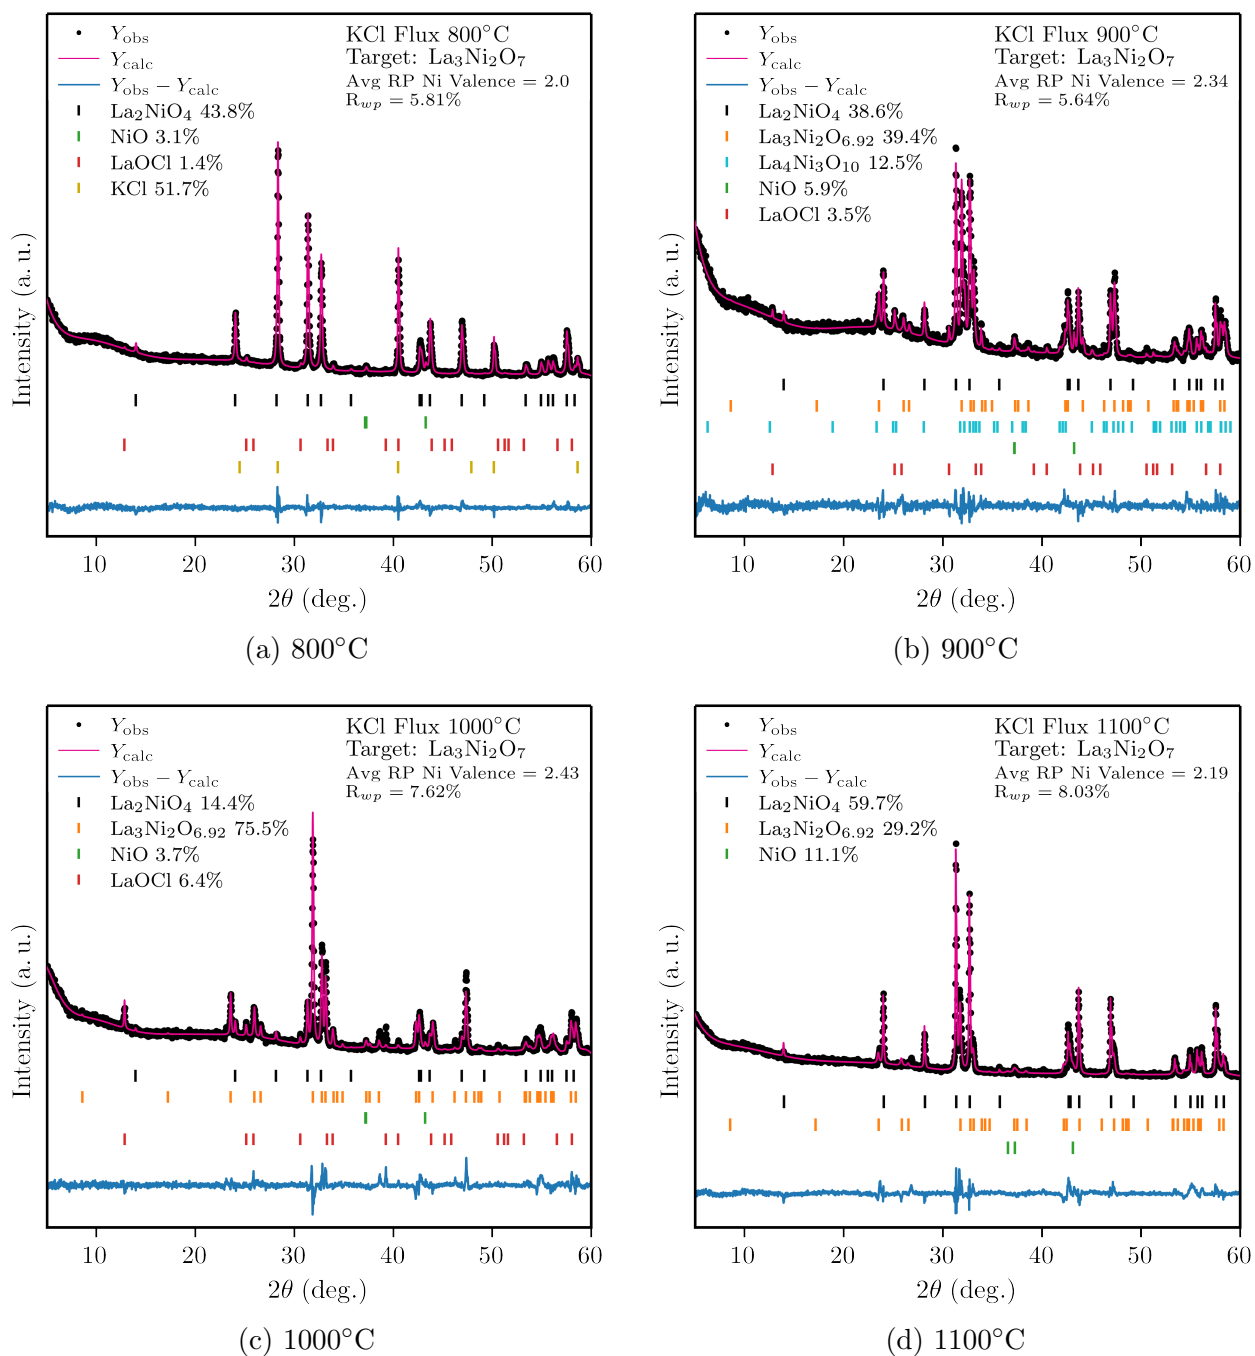

Figure 31: PXRd and Rietveld refinements of targeted  $\text{La}_3\text{Ni}_2\text{O}_7$  where  $\frac{\text{Ni}}{\text{Ni}+\text{La}} = 0.40$  in KCl flux at (a) 800°C, (b) 900°C, (c) 1000°C, and (d) 1100°C.

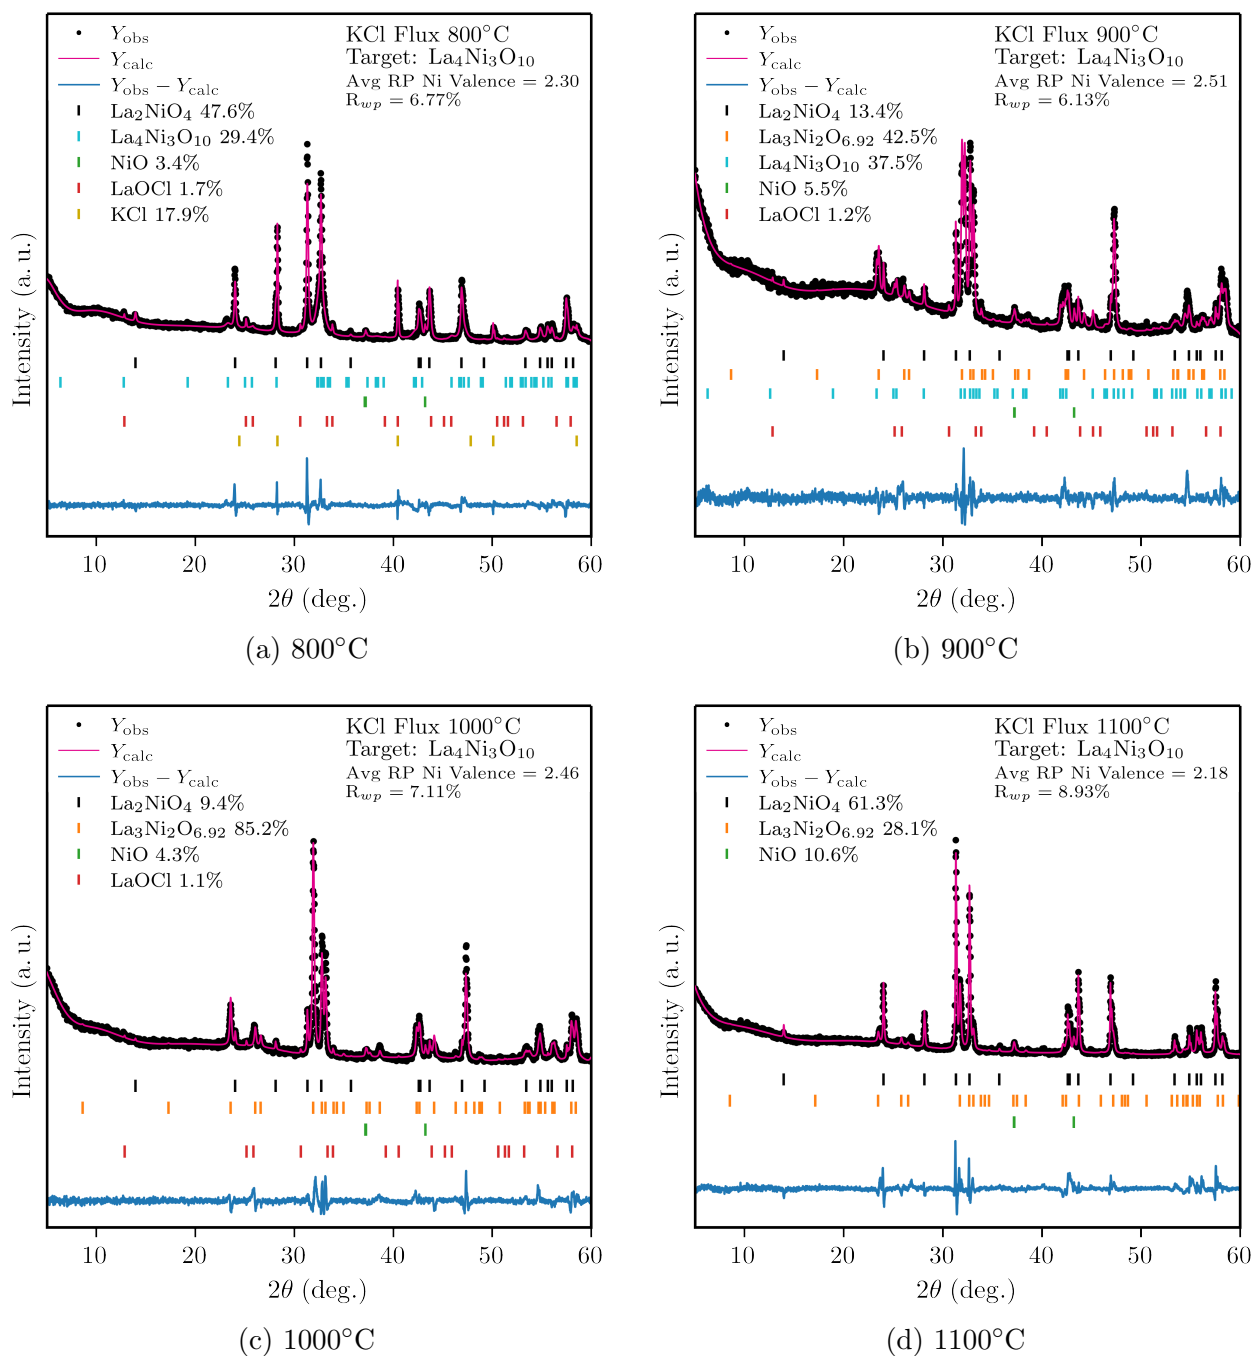

Figure 32: PXRD and Rietveld refinements of targeted  $\text{La}_4\text{Ni}_3\text{O}_{10}$  where  $\frac{\text{Ni}}{\text{Ni}+\text{La}} = 0.43$  in KCl flux at (a) 800°C, (b) 900°C, (c) 1000°C, and (d) 1100°C.

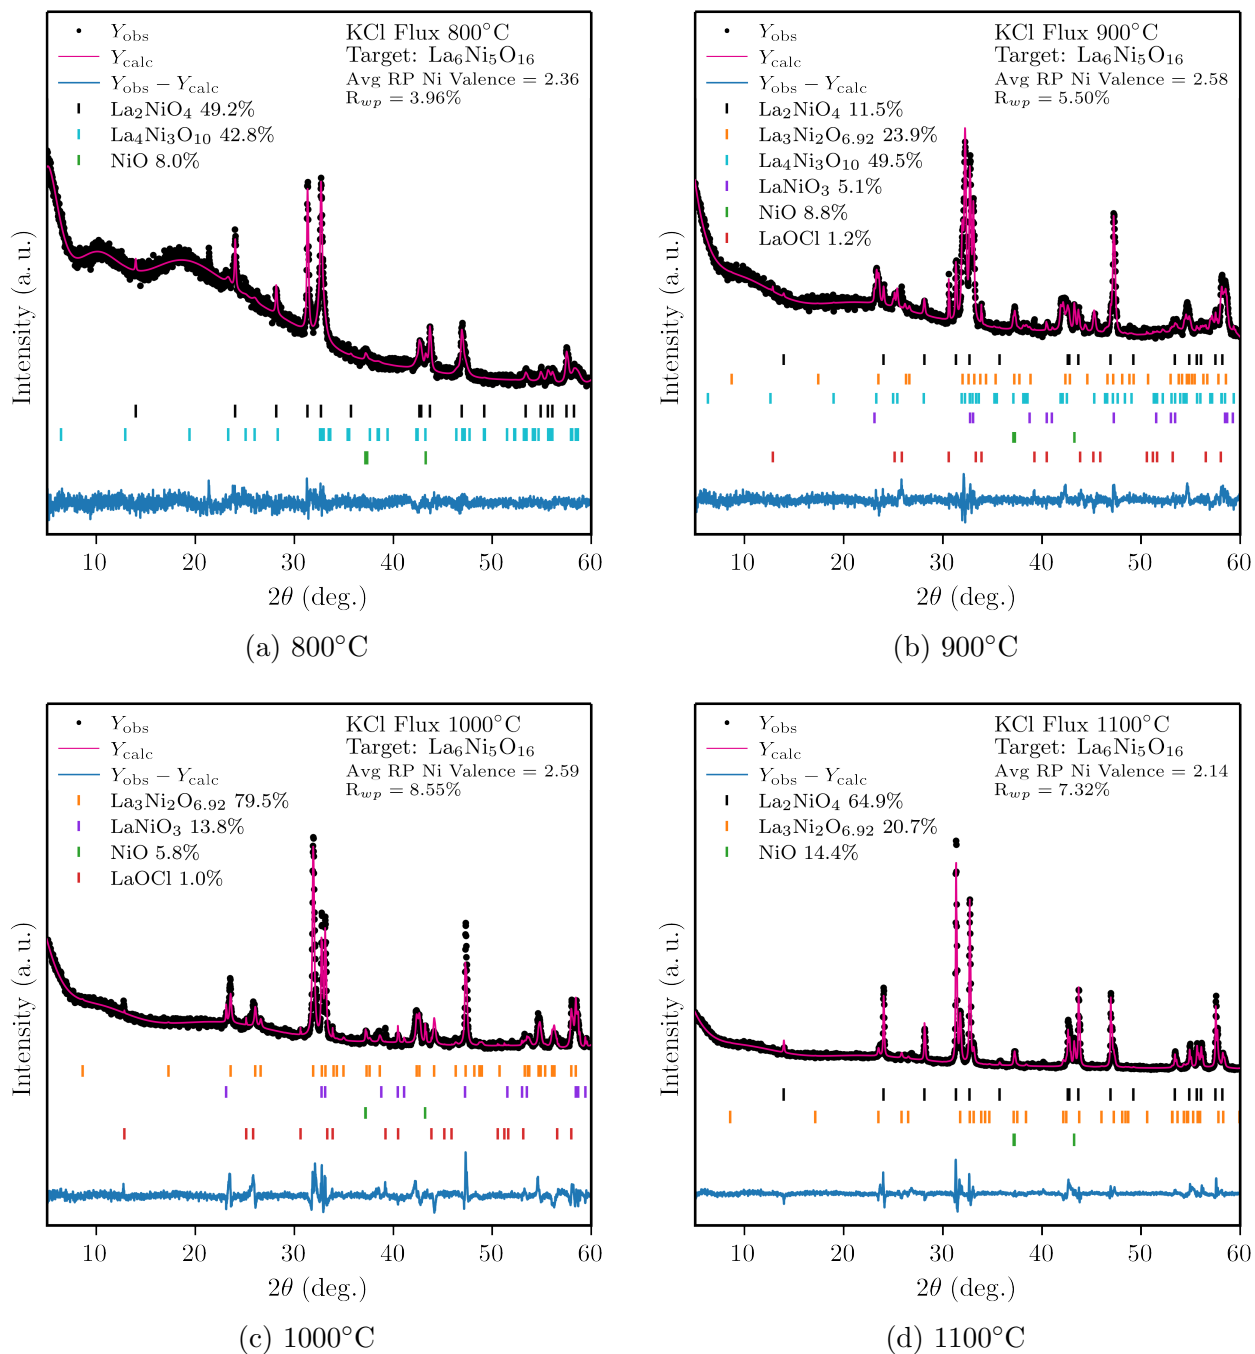

Figure 33: PXRD and Rietveld refinements of targeted  $\text{La}_6\text{Ni}_5\text{O}_{16}$  where  $\frac{\text{Ni}}{\text{Ni}+\text{La}} = 0.454$  in KCl flux at (a) 800°C, (b) 900°C, (c) 1000°C, and (d) 1100°C.

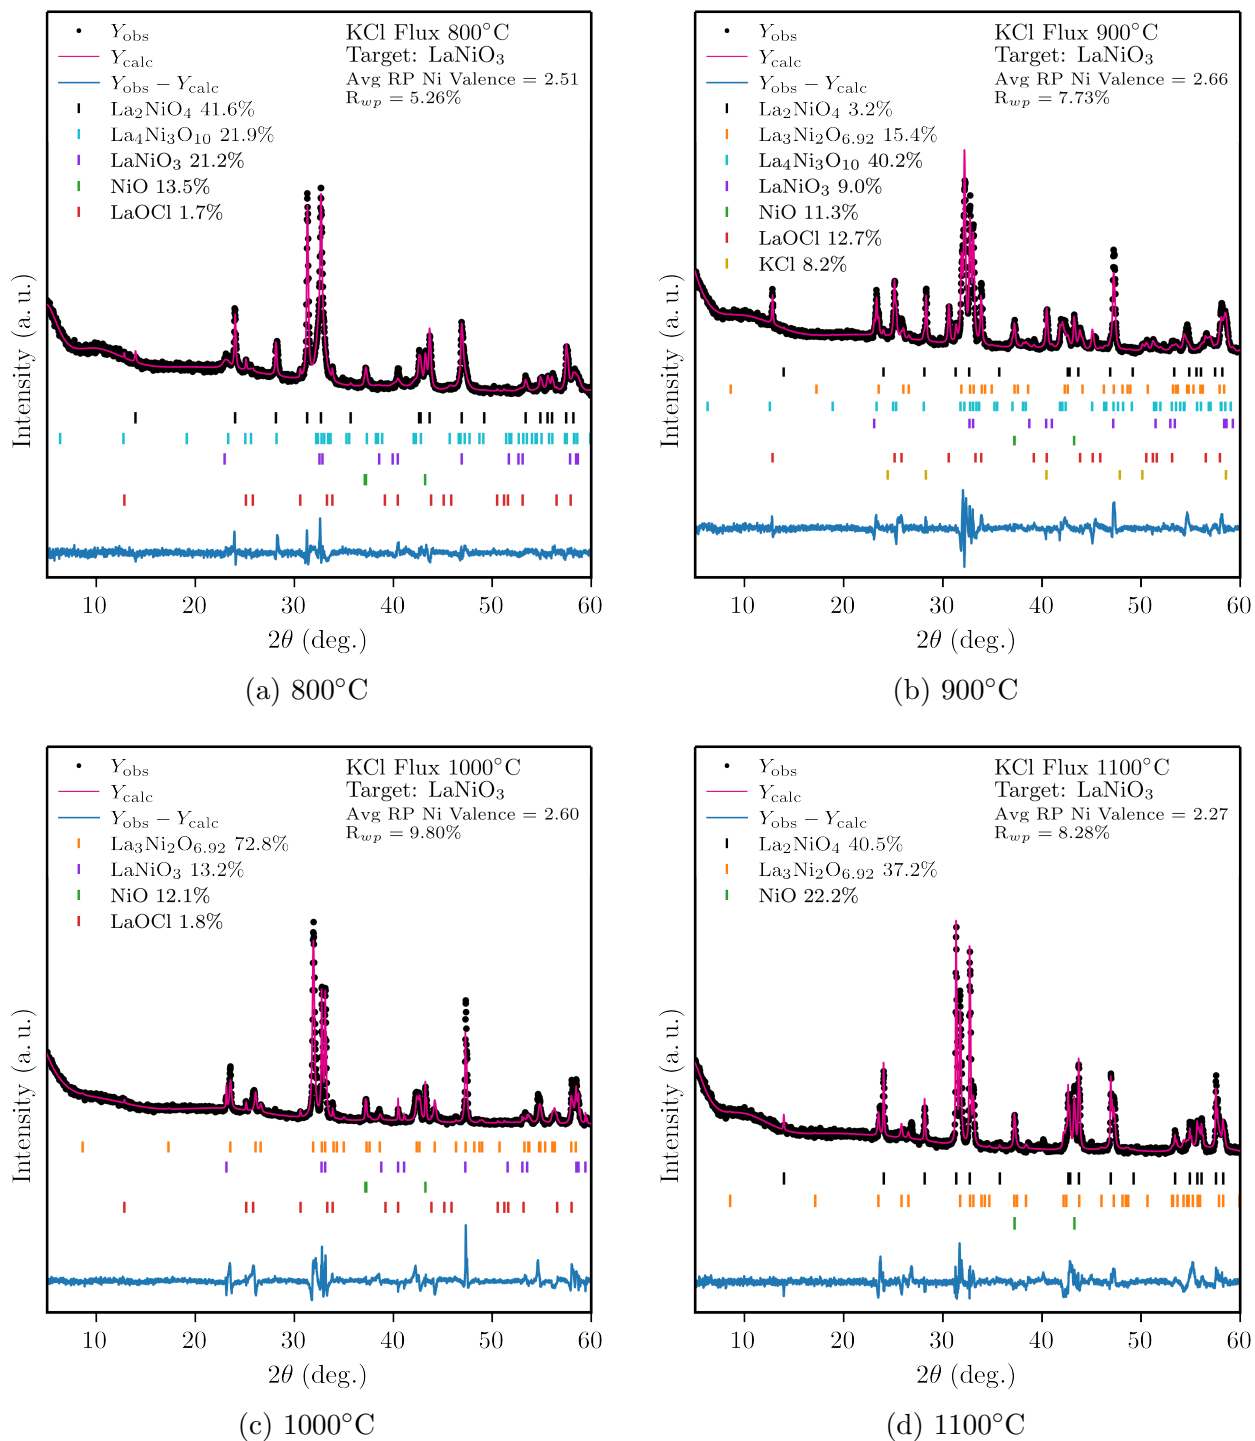

Figure 34: PXR D and Rietveld refinements of targeted  $\text{LaNiO}_3$  where  $\frac{\text{Ni}}{\text{Ni+La}} = 0.5$  in KCl flux at (a) 800°C, (b) 900°C, (c) 1000°C, and (d) 1100°C.

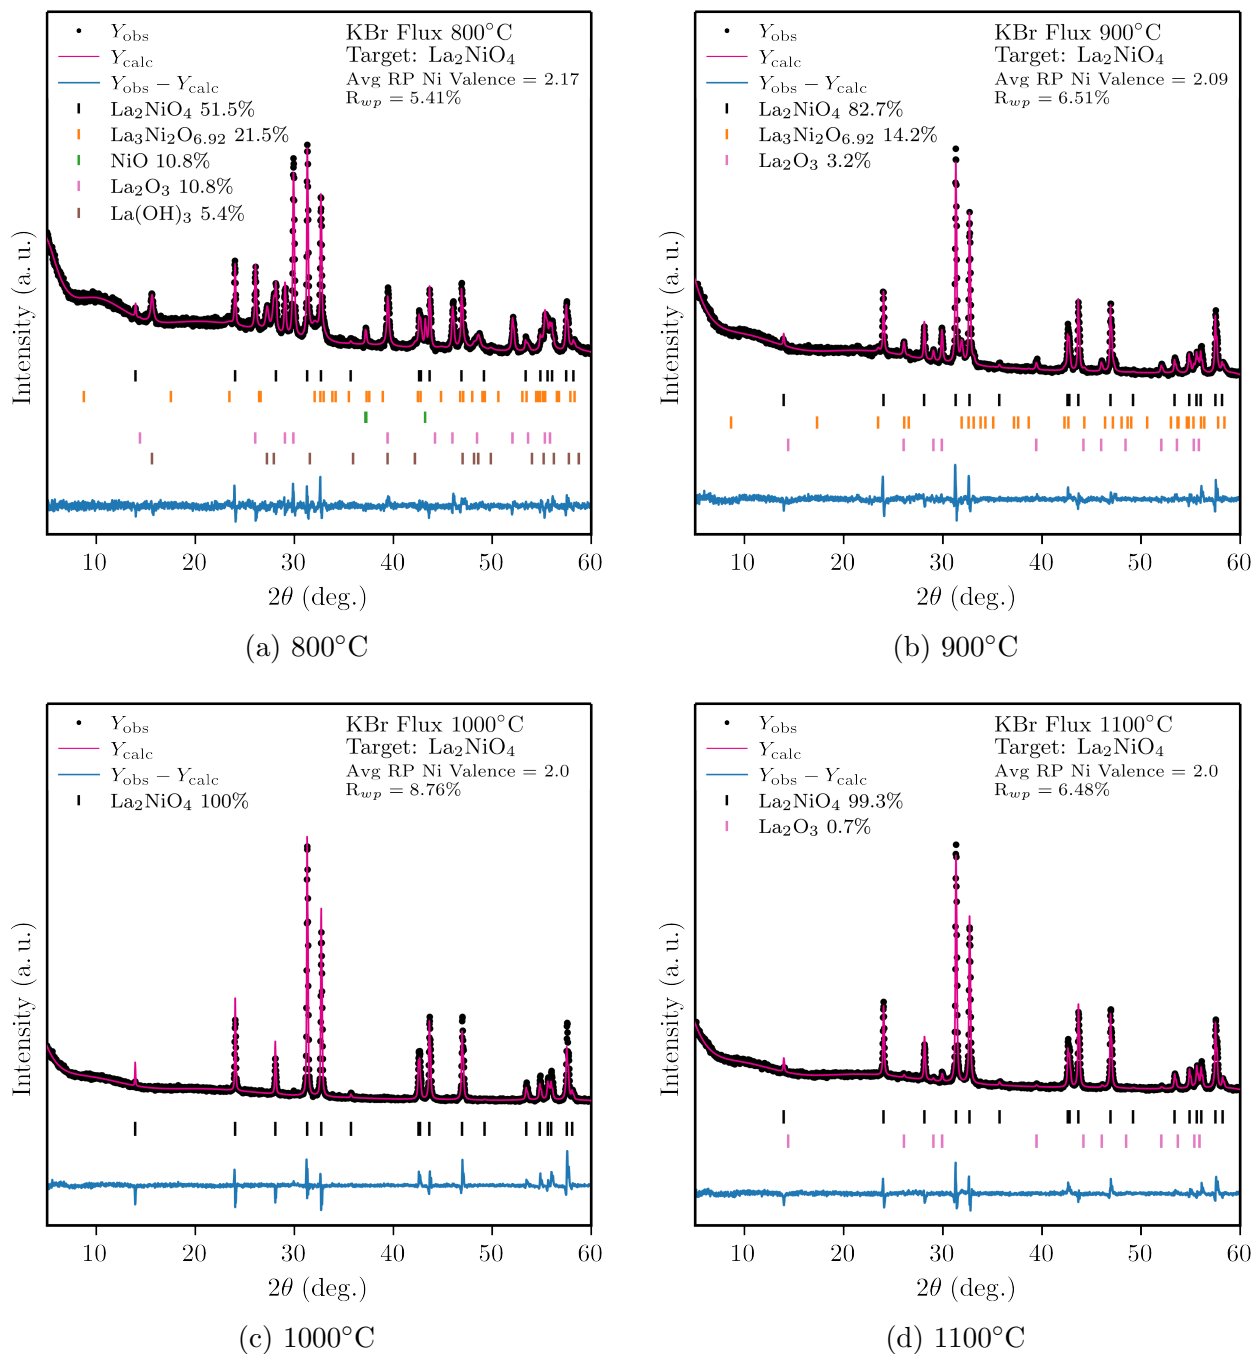

Figure 35: PXRD and Rietveld refinements of targeted  $\text{La}_2\text{NiO}_4$  with  $\frac{\text{Ni}}{\text{Ni}+\text{La}} = 0.33$  in KBr flux at (a) 800°C, (b) 900°C, (c) 1000°C, and (d) 1100°C.

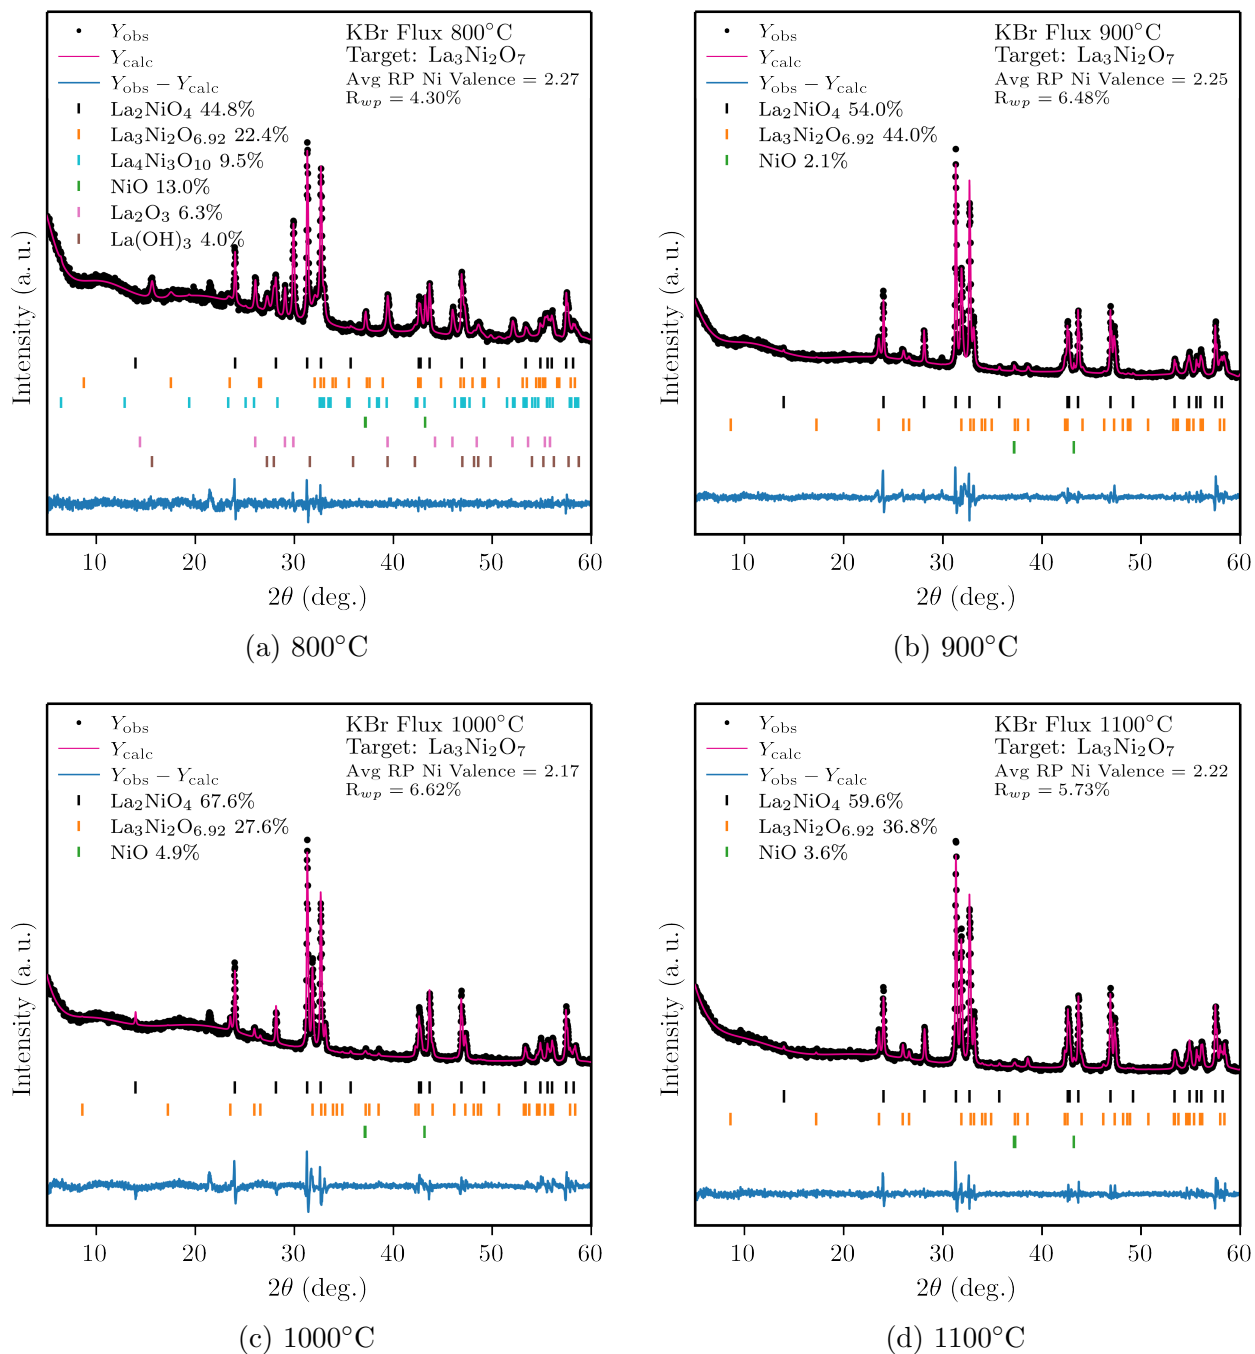

Figure 36: PXRD and Rietveld refinements of targeted  $\text{La}_3\text{Ni}_2\text{O}_7$  where  $\frac{\text{Ni}}{\text{Ni}+\text{La}} = 0.40$  in KBr flux at (a) 800°C, (b) 900°C, (c) 1000°C, and (d) 1100°C.

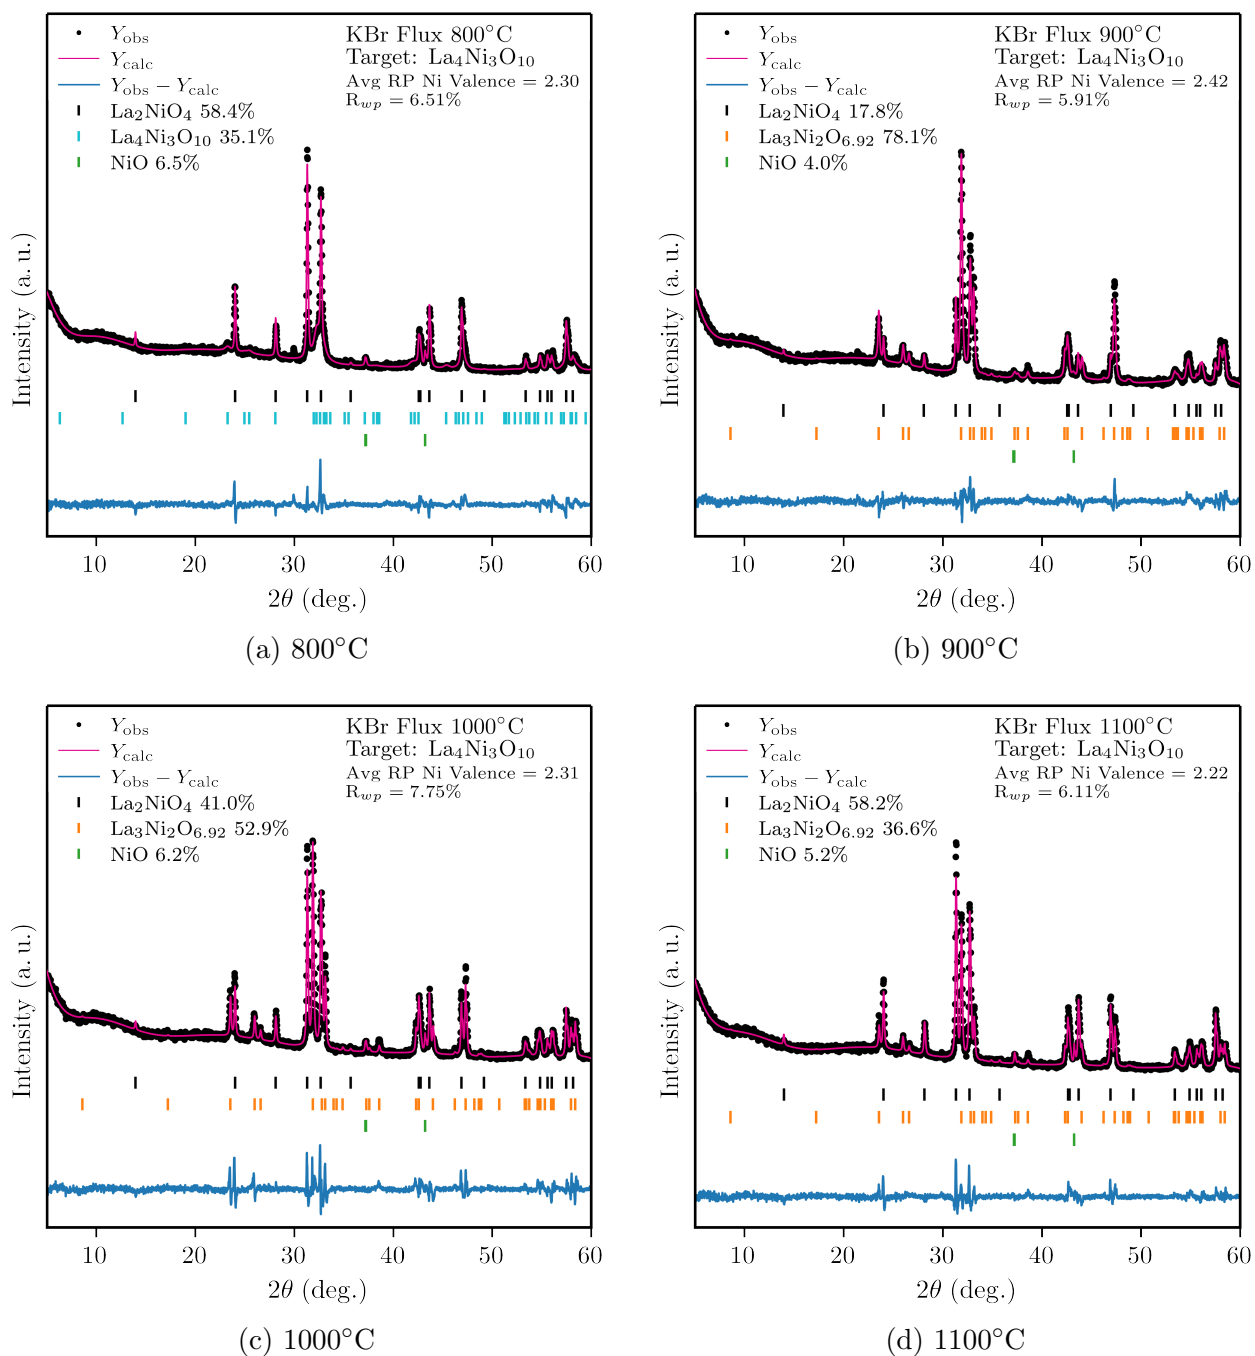

Figure 37: PXR and Rietveld refinements of targeted  $\text{La}_4\text{Ni}_3\text{O}_{10}$  where  $\frac{\text{Ni}}{\text{Ni}+\text{La}} = 0.43$  in KBr flux at (a) 800°C, (b) 900°C, (c) 1000°C, and (d) 1100°C.

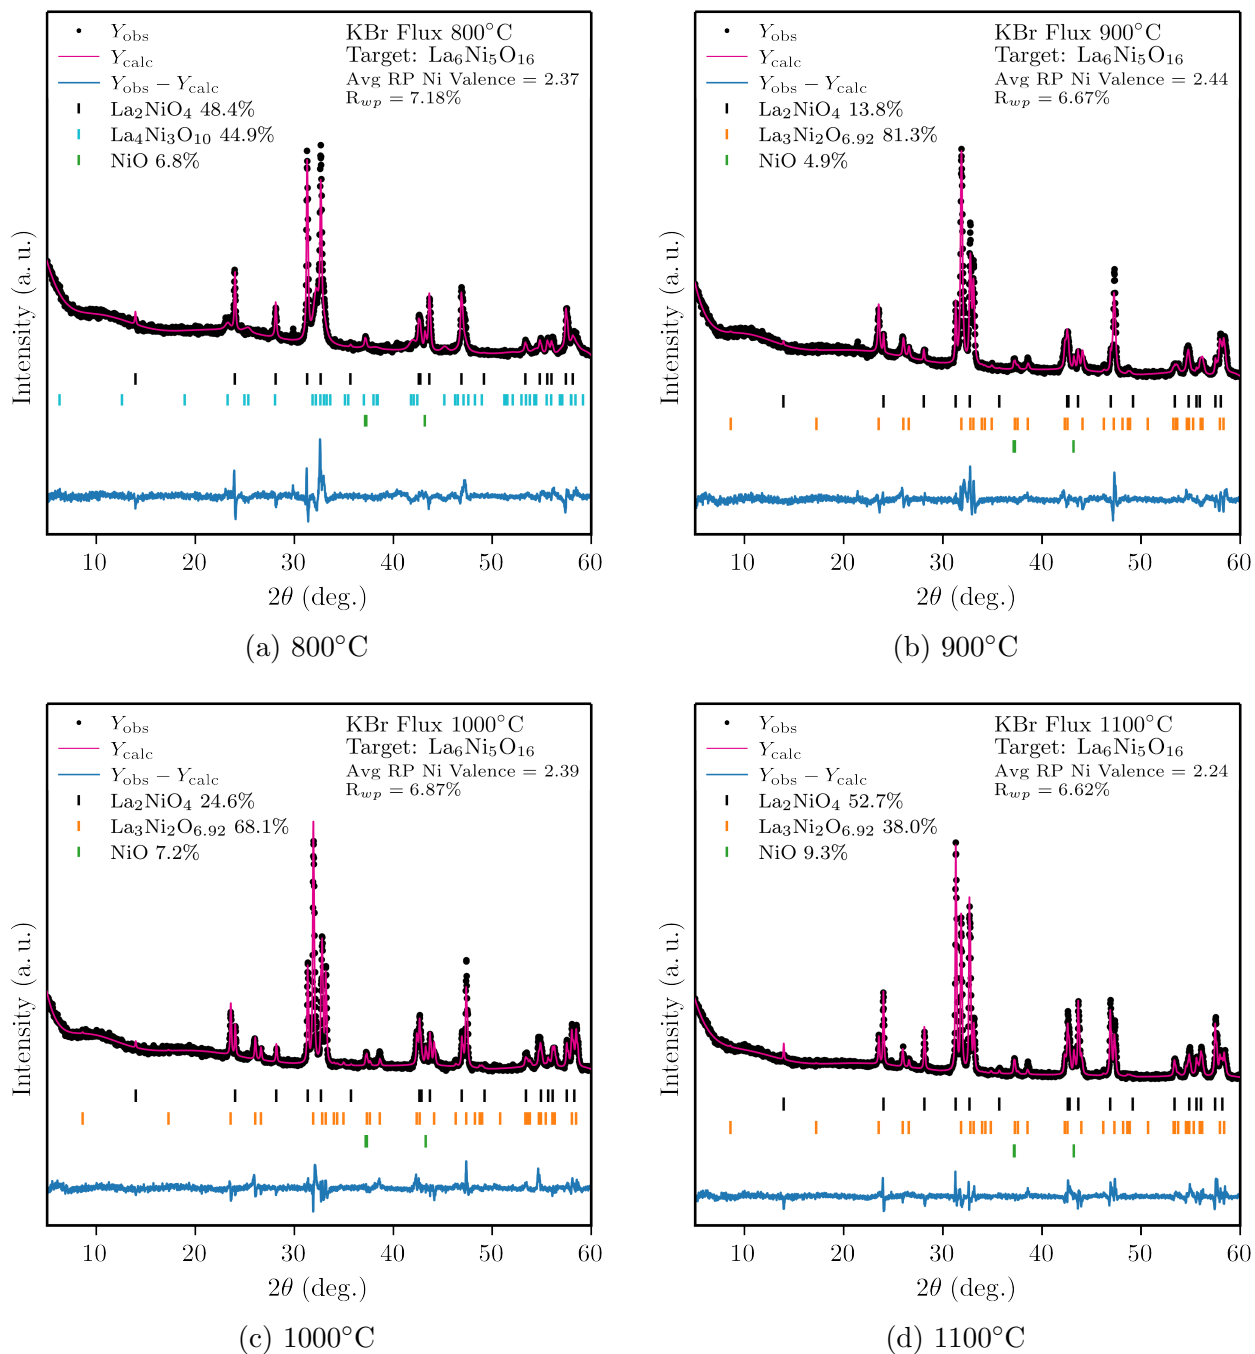

Figure 38: PXRD and Rietveld refinements of targeted  $\text{La}_6\text{Ni}_5\text{O}_{16}$  where  $\frac{\text{Ni}}{\text{Ni}+\text{La}} = 0.454$  in KBr flux at (a) 800°C, (b) 900°C, (c) 1000°C, and (d) 1100°C.

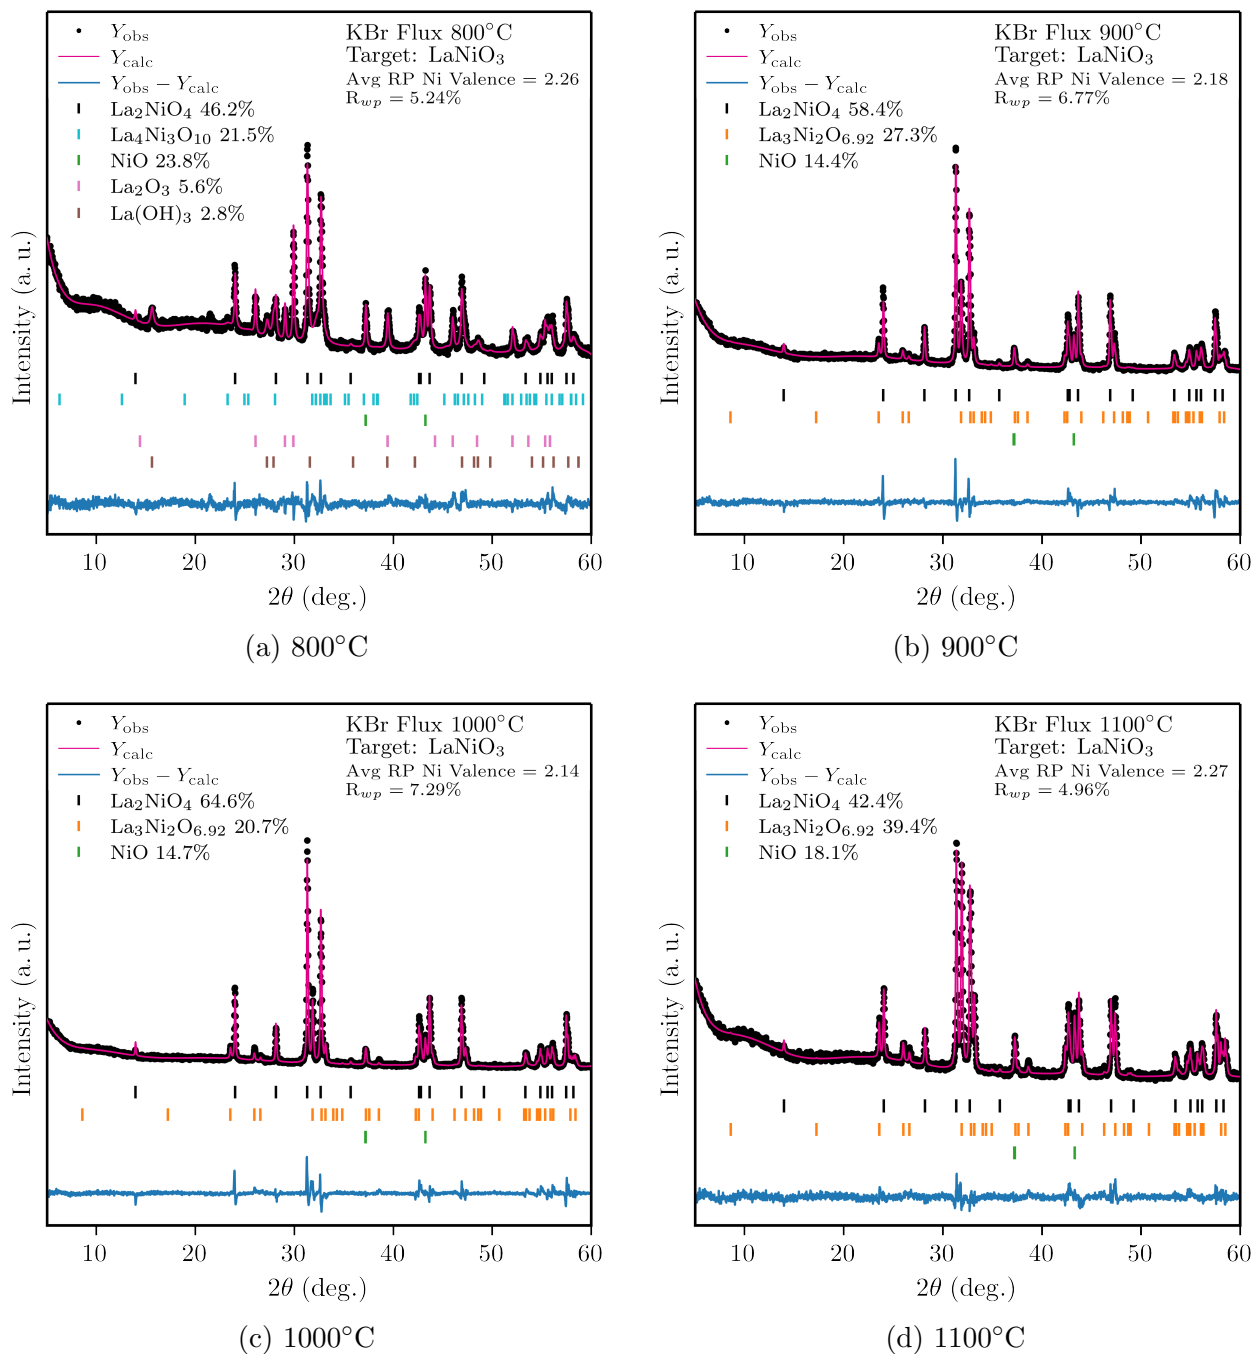

Figure 39: PXRD and Rietveld refinements of targeted  $\text{LaNiO}_3$  where  $\frac{\text{Ni}}{\text{Ni}+\text{La}} = 0.5$  in KBr flux at (a) 800°C, (b) 900°C, (c) 1000°C, and (d) 1100°C.

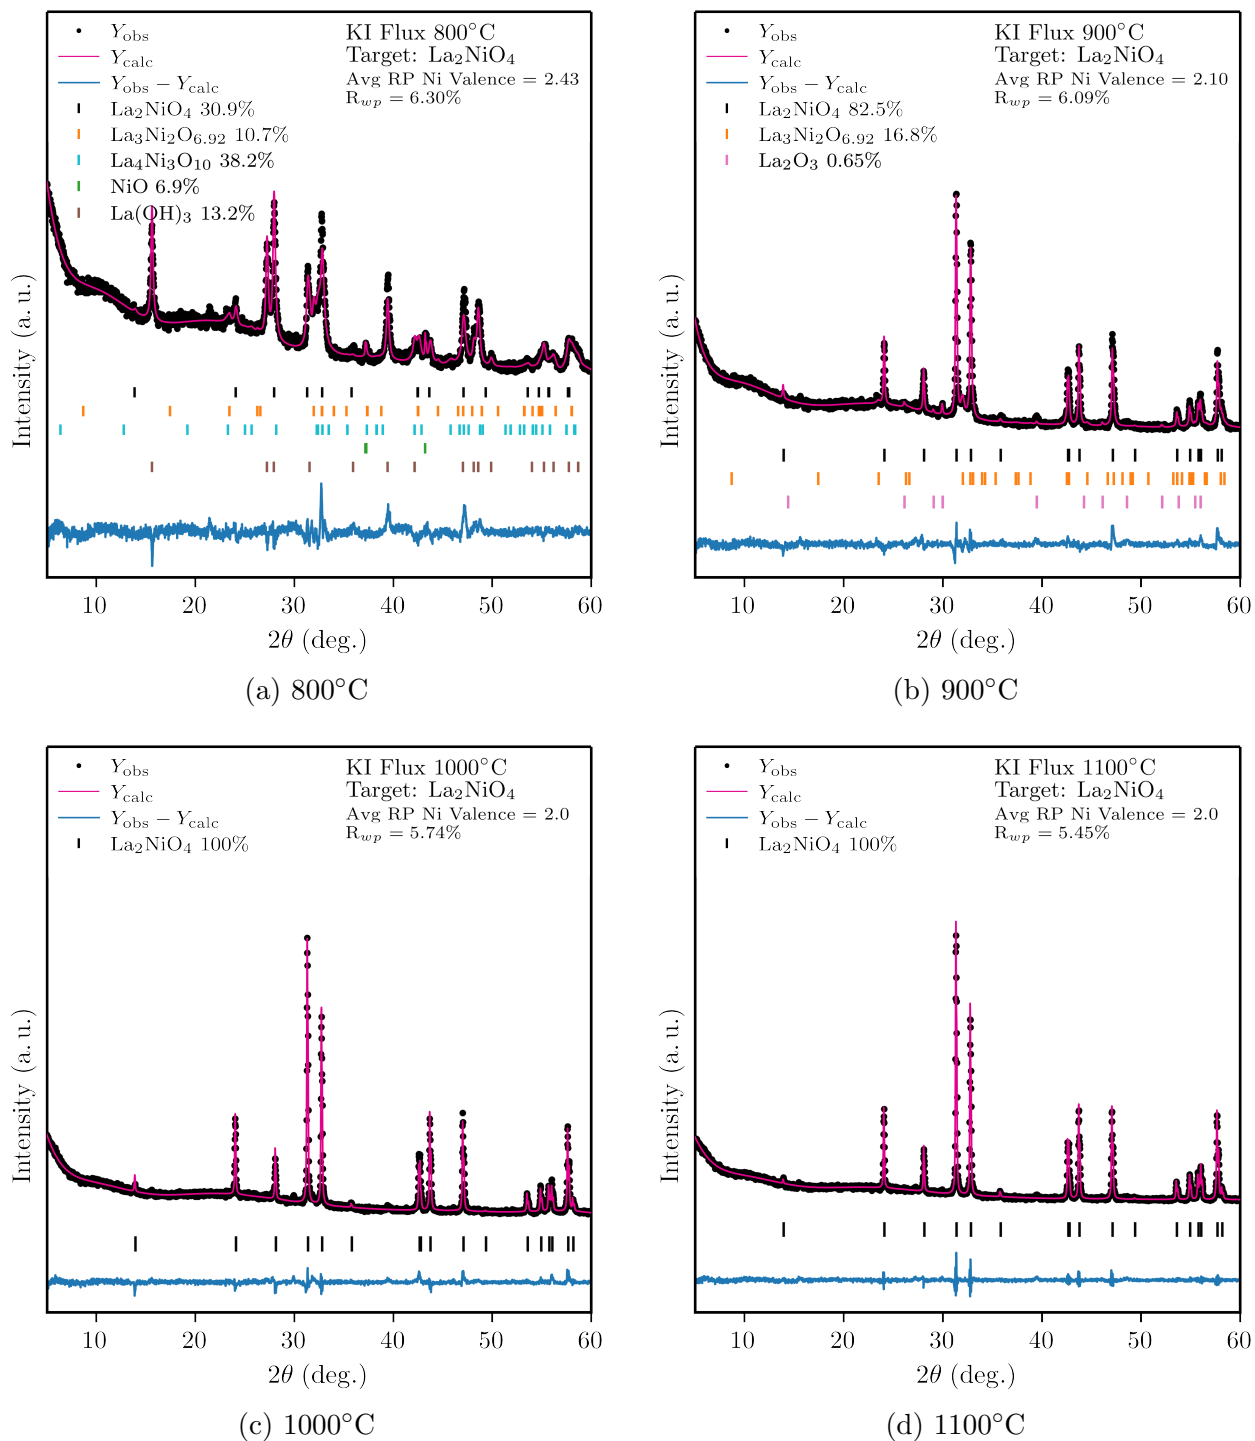

Figure 40: PXR D and Rietveld refinements of targeted  $\text{La}_2\text{NiO}_4$  where  $\frac{\text{Ni}}{\text{Ni+La}} = 0.33$  in KI flux at (a) 800°C, (b) 900°C, (c) 1000°C, and (d) 1100°C.

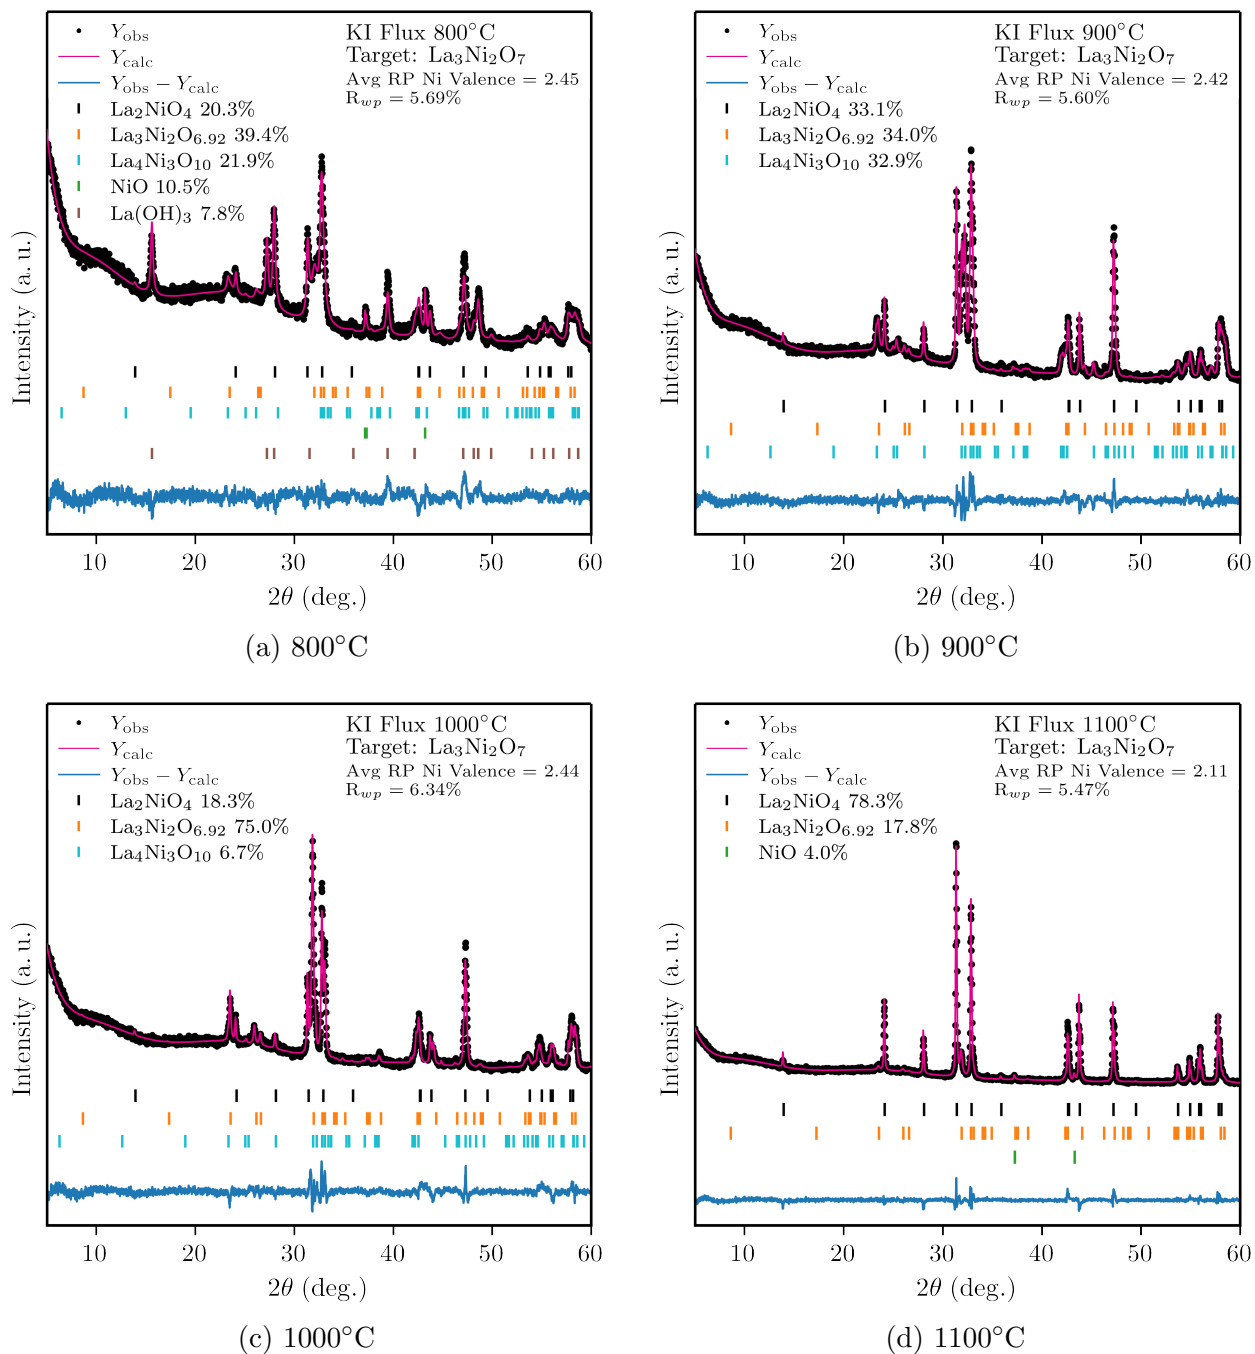

Figure 41: PXRD and Rietveld refinements of targeted  $\text{La}_3\text{Ni}_2\text{O}_7$  where  $\frac{\text{Ni}}{\text{Ni}+\text{La}} = 0.40$  in KI flux at (a) 800°C, (b) 900°C, (c) 1000°C, and (d) 1100°C.

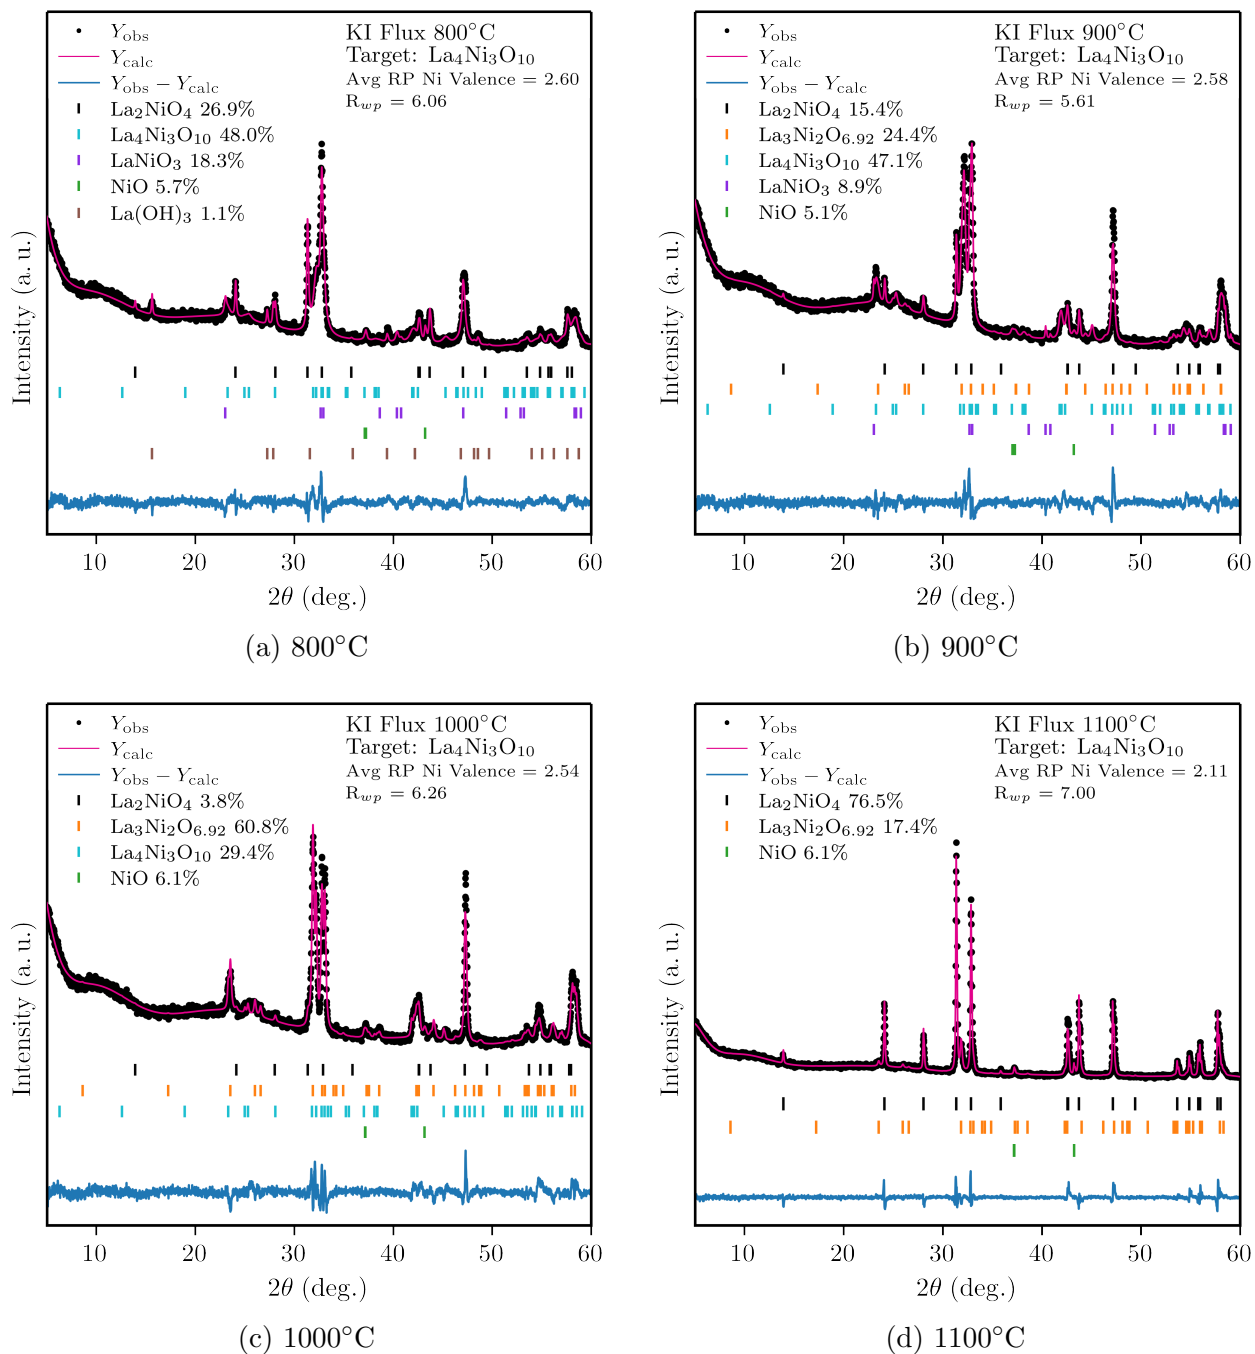

Figure 42: PXRd and Rietveld refinements of targeted  $\text{La}_4\text{Ni}_3\text{O}_{10}$  where  $\frac{\text{Ni}}{\text{Ni}+\text{La}} = 0.43$  in KI flux at (a) 800°C, (b) 900°C, (c) 1000°C, and (d) 1100°C.

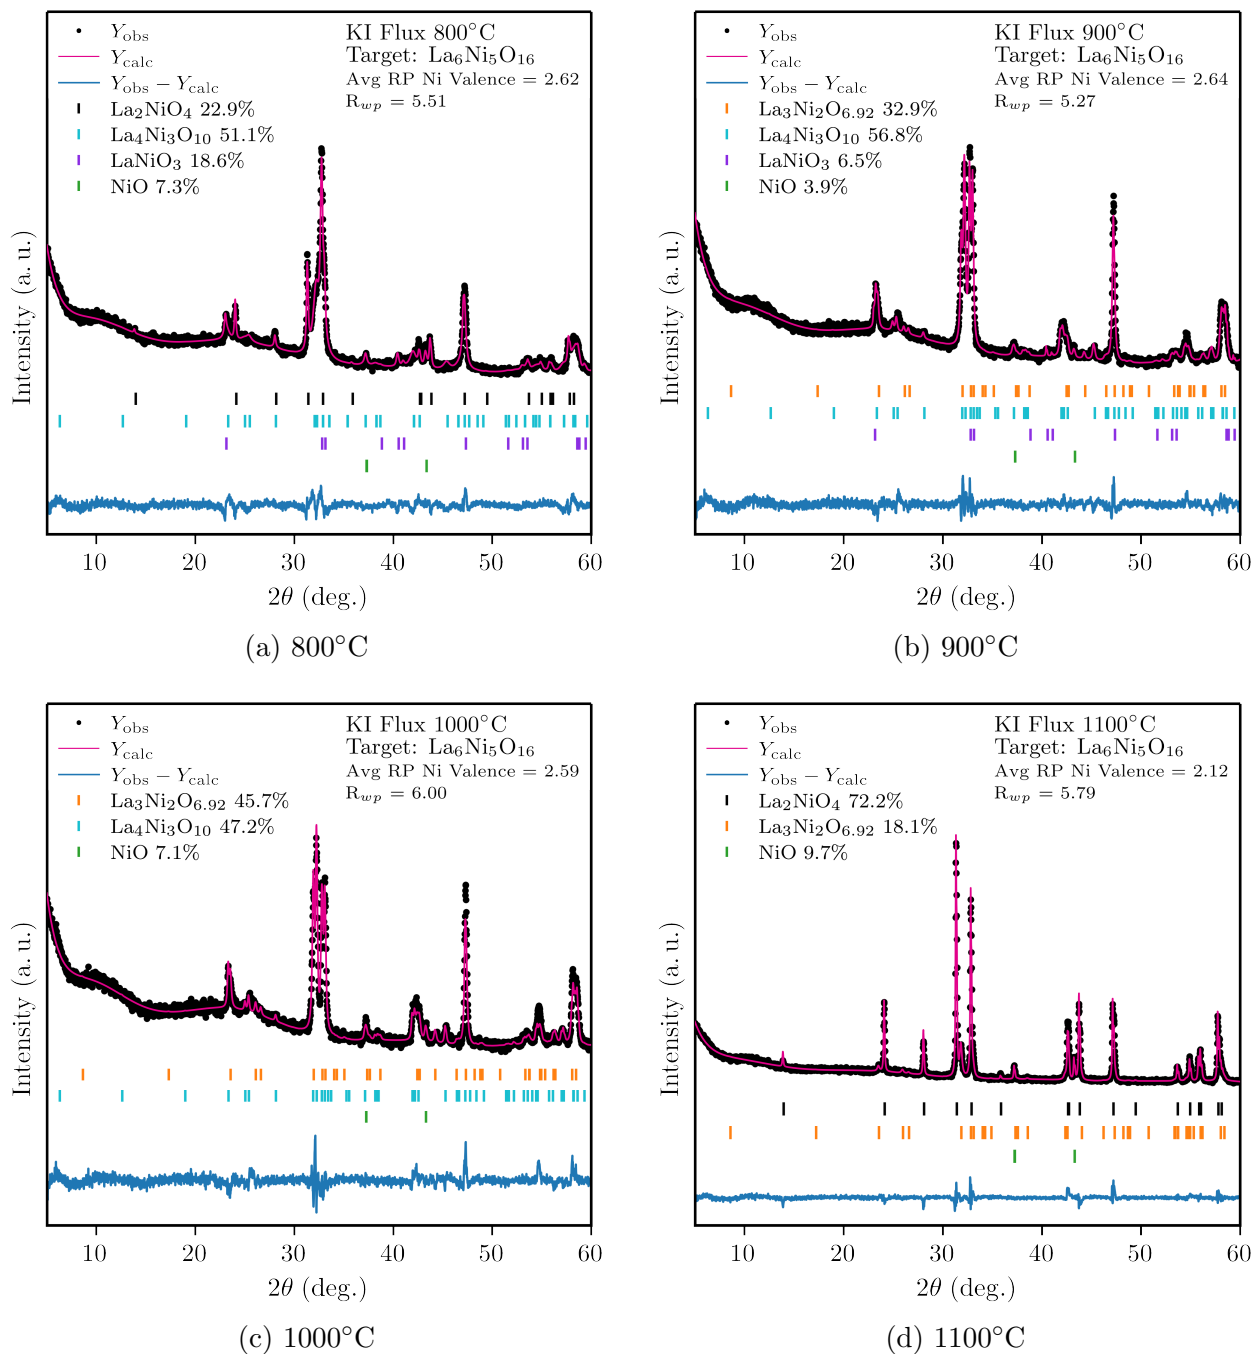

Figure 43: PXRD and Rietveld refinements of targeted  $\text{La}_6\text{Ni}_5\text{O}_{16}$  where  $\frac{\text{Ni}}{\text{Ni+La}}} = 0.454$  in KI flux at (a) 800°C, (b) 900°C, (c) 1000°C, and (d) 1100°C.

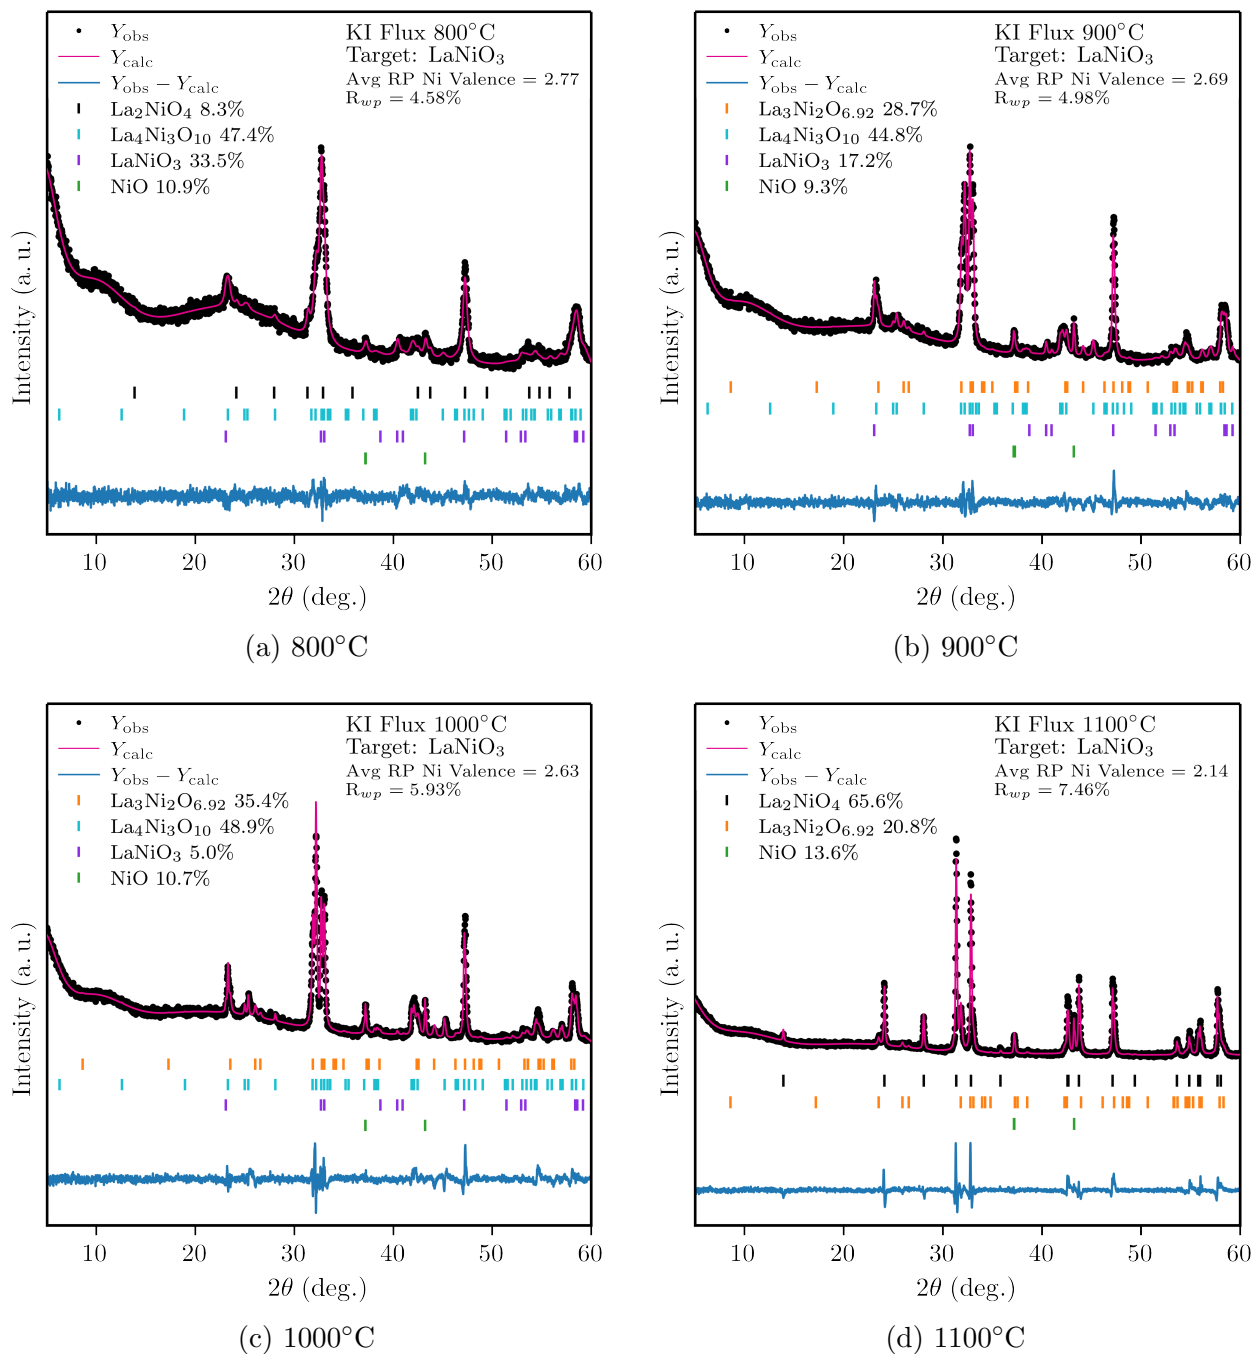

Figure 44: PXRd and Rietveld refinements of targeted  $\text{LaNiO}_3$  where  $\frac{\text{Ni}}{\text{Ni}+\text{La}} = 0.5$  in KI flux at (a) 800°C, (b) 900°C, (c) 1000°C, and (d) 1100°C.

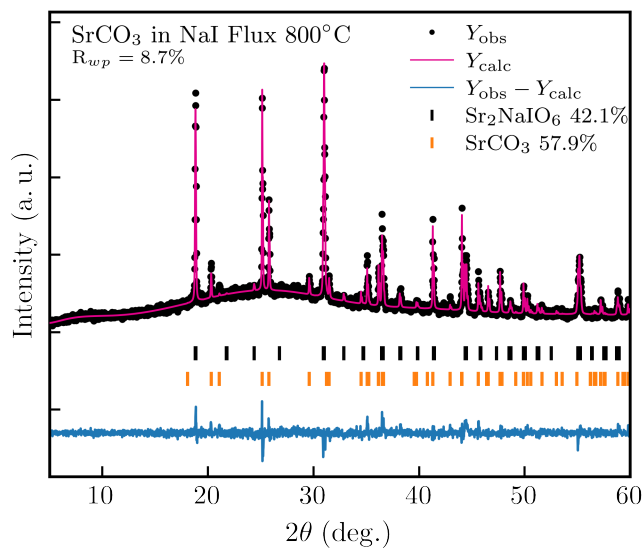

Figure 45: PXRd and Rietveld refinement of SrCO<sub>3</sub> in a NaI flux at 800°C forming Sr<sub>2</sub>NaIO<sub>6</sub> to illustrate the oxidation of iodine to +7 in air.

## 0.1 Refinement Parameters, Results, and Thermodynamic Tables

Table 0.1: Fluxless: phase metrics vs targeted homology composition and temperature.

| Target                                | T<br>(°C) | $\text{La}_2\text{NiO}_4$<br>I4/mmm<br>$\alpha = \beta = \gamma = 90^\circ$<br>a, c | $\text{La}_3\text{Ni}_2\text{O}_{6.92}$<br>Fmmm<br>$\alpha = \beta = \gamma = 90^\circ$<br>a, b, c | $\text{LaNiO}_3$<br>R3c<br>$\alpha = \beta = \gamma = 90^\circ$<br>a, c | $\text{NiO}$<br>R3m<br>$\alpha = \beta = \gamma = 90^\circ$<br>a, c | Impurities                                         | GOF  | Rwp   |
|---------------------------------------|-----------|-------------------------------------------------------------------------------------|----------------------------------------------------------------------------------------------------|-------------------------------------------------------------------------|---------------------------------------------------------------------|----------------------------------------------------|------|-------|
| $\text{La}_2\text{NiO}_4$             | 800       | a=3.8613(8);<br>c=12.725(6)                                                         | —                                                                                                  | —                                                                       | a=2.9550(6);<br>c=7.249(3)                                          | $\text{La}_2\text{O}_3$ ; $\text{La}(\text{OH})_3$ | 1.47 | 5.20  |
|                                       | 900       | a=3.8576(4);<br>c=12.687(3)                                                         | —                                                                                                  | —                                                                       | a=2.9547(3);<br>c=7.2248(15)                                        | $\text{La}(\text{OH})_3$                           | 1.53 | 5.42  |
|                                       | 1000      | a=3.85941(9);<br>c=12.6840(6)                                                       | —                                                                                                  | —                                                                       | a=2.9538(3);<br>c=7.2260(17)                                        | $\text{La}(\text{OH})_3$                           | 1.45 | 5.18  |
|                                       | 1100      | a=3.86143(6);<br>c=12.6829(3)                                                       | —                                                                                                  | —                                                                       | a=2.9547(3);<br>c=7.2281(14)                                        | $\text{La}_2\text{O}_3$ ; $\text{La}(\text{OH})_3$ | 1.31 | 8.84  |
| $\text{La}_3\text{Ni}_2\text{O}_7$    | 800       | a=3.8567(17);<br>c=12.608(12)                                                       | —                                                                                                  | —                                                                       | a=2.9537(3);<br>c=7.2240(15)                                        | $\text{La}_2\text{O}_3$ ; $\text{La}(\text{OH})_3$ | 1.46 | 5.02  |
|                                       | 900       | a=3.8633(5);<br>c=12.709(3)                                                         | —                                                                                                  | —                                                                       | a=2.9590(3);<br>c=7.2342(13)                                        | $\text{La}(\text{OH})_3$                           | 1.74 | 6.03  |
|                                       | 1000      | a=3.85938(15);<br>c=12.6845(6)                                                      | a=5.397(3), b=5.460(3);<br>c=20.492(12)                                                            | —                                                                       | a=2.9536(2);<br>c=7.2250(10)                                        | $\text{La}(\text{OH})_3$                           | 1.42 | 4.91  |
|                                       | 1100      | a=3.86092(7);<br>c=12.6830(3)                                                       | a=5.404(3), b=5.447(3);<br>c=20.566(11)                                                            | —                                                                       | a=2.9525(3);<br>c=7.2391(16)                                        | $\text{La}_2\text{O}_3$                            | 1.56 | 10.84 |
| $\text{La}_4\text{Ni}_3\text{O}_{10}$ | 800       | a=3.8585(4);<br>c=12.574(9)                                                         | —                                                                                                  | —                                                                       | a=2.9507(4);<br>c=7.238(2)                                          | $\text{La}(\text{OH})_3$                           | 1.73 | 12.43 |
|                                       | 900       | a=3.8595(5);<br>c=12.639(6)                                                         | —                                                                                                  | —                                                                       | a=2.95(14);<br>c=7.23(7)                                            | $\text{La}(\text{OH})_3$                           | 2.08 | 15.72 |
|                                       | 1000      | a=3.85949(7);<br>c=12.6908(4)                                                       | a=5.4069(8), b=5.4538(9);<br>c=20.479(4)                                                           | —                                                                       | a=2.9514(4);<br>c=7.240(2)                                          | $\text{La}(\text{OH})_3$                           | 1.52 | 5.58  |
|                                       | 1100      | a=3.86341(4);<br>c=12.6928(2)                                                       | a=5.407(14), b=5.456(16);<br>c=20.577(6)                                                           | —                                                                       | a=2.9565(2);<br>c=7.231(11)                                         | $\text{La}_2\text{O}_3$                            | 1.56 | 10.42 |
| $\text{La}_6\text{Ni}_5\text{O}_{16}$ | 800       | a=3.8643(5);<br>c=12.632(8)                                                         | —                                                                                                  | —                                                                       | a=2.9545(5);<br>c=7.250(3)                                          | $\text{La}_2\text{O}_3$ ; $\text{La}(\text{OH})_3$ | 1.47 | 5.09  |
|                                       | 900       | a=3.8612(3);<br>c=12.684(5)                                                         | —                                                                                                  | —                                                                       | a=2.9583(5);<br>c=7.231(3)                                          | $\text{La}(\text{OH})_3$                           | 1.65 | 5.59  |
|                                       | 1000      | a=3.8623(14);<br>c=12.7151(9)                                                       | a=5.4149(6), b=5.4598(7);<br>c=20.469(3)                                                           | —                                                                       | a=2.955(11);<br>c=7.247(6)                                          | —                                                  | 1.60 | 5.89  |
|                                       | 1100      | a=3.86201(5);<br>c=12.6900(3)                                                       | a=5.4098(7), b=5.4509(9);<br>c=20.572(4)                                                           | —                                                                       | a=2.9538(3);<br>c=7.241(2)                                          | —                                                  | 1.68 | 12.47 |
| $\text{LaNiO}_3$                      | 800       | a=3.864(3);<br>c=12.51(15)                                                          | —                                                                                                  | —                                                                       | a=2.9558(2);<br>c=7.250(12)                                         | $\text{La}(\text{OH})_3$                           | 1.50 | 4.99  |
|                                       | 900       | a=3.858(2);<br>c=12.71(13)                                                          | —                                                                                                  | —                                                                       | a=2.9548(2);<br>c=7.248(11)                                         | $\text{La}(\text{OH})_3$                           | 1.70 | 5.60  |
|                                       | 1000      | a=3.86305(9);<br>c=12.7000(6)                                                       | a=5.402(14), b=5.465(16);<br>c=20.532(6)                                                           | —                                                                       | a=2.9542(3);<br>c=7.244(15)                                         | $\text{La}(\text{OH})_3$                           | 1.36 | 4.93  |
|                                       | 1100      | a=3.86162(7);<br>c=12.6902(3)                                                       | a=5.4029(4), b=5.4500(5);<br>c=20.537(19)                                                          | —                                                                       | a=2.9527(14);<br>c=7.2400(7)                                        | $\text{La}_2\text{O}_3$ ; $\text{La}(\text{OH})_3$ | 1.50 | 10.64 |

Table 0.2: NaCl flux: phase metrics vs targeted homology composition and temperature.

| Target                                | T<br>(°C) | $\text{La}_2\text{NiO}_4$<br>I4/mmm<br>$\alpha = \beta = \gamma = 90^\circ$<br>a, c | $\text{La}_3\text{Ni}_2\text{O}_{6.92}$<br>Fmmm<br>$\alpha = \beta = \gamma = 90^\circ$<br>a, b, c | $\text{La}_4\text{Ni}_3\text{O}_{10}$<br>Fmmm<br>$\alpha = \beta = \gamma = 90^\circ$<br>a, b, c | $\text{La}_4\text{NiO}_3$<br>R3c<br>$\alpha = \beta = \gamma = 90^\circ$<br>a, c | NiO<br>R3m<br>$\alpha = \beta = \gamma = 90^\circ$<br>a, c | Impurities                     | GOF  | Rwp  |
|---------------------------------------|-----------|-------------------------------------------------------------------------------------|----------------------------------------------------------------------------------------------------|--------------------------------------------------------------------------------------------------|----------------------------------------------------------------------------------|------------------------------------------------------------|--------------------------------|------|------|
| $\text{La}_2\text{NiO}_4$             | 830       | a=3.86418(19);<br>c=12.6424(9)                                                      | a=5.44(10), b=5.44(10);<br>c=19.729                                                                | —                                                                                                | —                                                                                | —                                                          | LaOCl; $\text{La}_2\text{O}_3$ | 1.41 | 5.48 |
|                                       | 900       | a=3.86181(5);<br>c=12.6294(3)                                                       | —                                                                                                  | —                                                                                                | —                                                                                | —                                                          | $\text{La}_2\text{O}_3$        | 1.38 | 5.13 |
|                                       | 1000      | a=3.86703(5);<br>c=12.6281(3)                                                       | a=5.3957(15), b=5.4480(18);<br>c=20.506(6)                                                         | —                                                                                                | —                                                                                | —                                                          | LaOCl                          | 1.49 | 9.88 |
|                                       | 1100      | a=3.85979(7);<br>c=12.6722(3)                                                       | —                                                                                                  | —                                                                                                | —                                                                                | —                                                          | —                              | 1.57 | 5.86 |
| $\text{La}_3\text{Ni}_2\text{O}_7$    | 830       | a=3.86390(19);<br>c=12.6346(8)                                                      | a=5.4(5), b=5.4(5);<br>c=19.78(2)                                                                  | —                                                                                                | —                                                                                | a=2.9573(10);<br>c=7.205(5)                                | —                              | 1.39 | 5.06 |
|                                       | 900       | a=3.85885(8);<br>c=12.6247(4)                                                       | a=5.422(7), b=5.473(8);<br>c=20.39(2)                                                              | —                                                                                                | —                                                                                | a=2.9526(16);<br>c=7.226(8)                                | —                              | 1.40 | 4.93 |
|                                       | 1000      | a=3.86476(14);<br>c=12.6263(6)                                                      | a=5.4038(16), b=5.455(2);<br>c=20.559(7)                                                           | —                                                                                                | —                                                                                | a=2.952(6);<br>c=7.23(3)                                   | LaOCl                          | 1.38 | 5.09 |
|                                       | 1100      | a=3.85528(8);<br>c=12.6240(3)                                                       | a=5.4031(13), b=5.4551(17);<br>c=20.622(6)                                                         | —                                                                                                | —                                                                                | a=2.95(4);<br>c=7.2(2)                                     | —                              | 1.57 | 5.66 |
| $\text{La}_4\text{Ni}_3\text{O}_{10}$ | 830       | a=3.8661(4);<br>c=12.677(2)                                                         | —                                                                                                  | a=5.418(3), b=5.467(3);<br>c=28.12(14)                                                           | a=5.448(11);<br>c=13.494(5)                                                      | a=2.952(15);<br>c=7.283(8)                                 | LaOCl                          | 1.60 | 5.65 |
|                                       | 900       | a=3.8631(18);<br>c=12.658(12)                                                       | a=5.4057(7), b=5.4616(8);<br>c=20.522(3)                                                           | a=5.407(18), b=5.461(19);<br>c=28.111(8)                                                         | —                                                                                | a=2.9504(9);<br>c=7.257(5)                                 | —                              | 1.66 | 5.98 |
|                                       | 1000      | a=3.8712(2);<br>c=12.654(15)                                                        | a=5.4029(3), b=5.4582(3);<br>c=20.560(16)                                                          | —                                                                                                | —                                                                                | a=2.953(17);<br>c=7.262(9)                                 | LaOCl                          | 1.76 | 6.42 |
|                                       | 1100      | a=3.86051(6);<br>c=12.6405(4)                                                       | a=5.401(13), b=5.466(13);<br>c=20.586(4)                                                           | —                                                                                                | —                                                                                | a=2.954(11);<br>c=7.246(5)                                 | —                              | 1.67 | 6.35 |
| $\text{La}_6\text{Ni}_5\text{O}_{16}$ | 830       | a=3.8564(6);<br>c=12.633(2)                                                         | —                                                                                                  | a=5.402(3), b=5.466(3);<br>c=27.947(14)                                                          | a=5.4625(9);<br>c=13.230(3)                                                      | a=2.952(6);<br>c=7.22(3)                                   | —                              | 1.22 | 4.11 |
|                                       | 900       | —                                                                                   | a=5.4050(7), b=5.4563(7);<br>c=20.446(3)                                                           | a=5.4039(9), b=5.4555(10);<br>c=28.082(5)                                                        | a=5.4551(7);<br>c=13.160(3)                                                      | a=2.9535(18);<br>c=7.215(9)                                | —                              | 1.64 | 5.72 |
|                                       | 1000      | —                                                                                   | a=5.3996(17), b=5.4527(7);<br>c=20.439(3)                                                          | a=5.3989(10), b=5.4551(11);<br>c=28.204(6)                                                       | —                                                                                | a=2.955(2);<br>c=7.224(11)                                 | LaOCl                          | 1.81 | 6.81 |
| $\text{La}_8\text{Ni}_7\text{O}_{20}$ | 1100      | a=3.85648(9);<br>c=12.6261(4)                                                       | a=5.4001(10), b=5.4523(13);<br>c=20.569(4)                                                         | —                                                                                                | —                                                                                | a=2.9544(4);<br>c=7.2214(19)                               | —                              | 1.57 | 5.52 |
|                                       | 1100      | —                                                                                   | —                                                                                                  | —                                                                                                | —                                                                                | —                                                          | —                              | —    | —    |
| $\text{LaNiO}_3$                      | 830       | —                                                                                   | —                                                                                                  | a=5.422(3), b=5.457(3);<br>c=27.83(13)                                                           | a=5.4724(7);<br>c=13.260(3)                                                      | a=2.952(3);<br>c=7.260(5)                                  | —                              | 1.75 | 6.02 |
|                                       | 900       | —                                                                                   | a=5.4050(7), b=5.4563(7);<br>c=20.492(2)                                                           | a=5.4110(7), b=5.4635(7);<br>c=28.121(4)                                                         | a=5.4647(5);<br>c=13.181(2)                                                      | a=2.9587(9);<br>c=7.224(4)                                 | —                              | 1.78 | 6.50 |
|                                       | 1000      | —                                                                                   | a=5.4048(4), b=5.4585(3);<br>c=20.469(19)                                                          | a=5.4045(9), b=5.4605(9);<br>c=28.244(5)                                                         | —                                                                                | a=2.954(10);<br>c=7.250(5)                                 | LaOCl                          | 1.99 | 7.14 |
|                                       | 1100      | a=3.86385(9);<br>c=12.6857(5)                                                       | a=5.4013(4), b=5.4625(5);<br>c=20.573(2)                                                           | —                                                                                                | —                                                                                | a=2.9586(3);<br>c=7.233(15)                                | —                              | 2.13 | 7.06 |

Table 0.3: NaBr flux: phase metrics vs targeted homology composition and temperature.

| Target                                          | T<br>(°C) | La <sub>2</sub> NiO <sub>4</sub><br>I4/mmm<br>$\alpha = \beta = \gamma = 90^\circ$<br>a, c | La <sub>3</sub> Ni <sub>2</sub> O <sub>6.92</sub><br>Fmmm<br>$\alpha = \beta = \gamma = 90^\circ$<br>a, b, c | La <sub>4</sub> Ni <sub>3</sub> O <sub>10</sub><br>Fmmm<br>$\alpha = \beta = \gamma = 90^\circ$<br>a, b, c | LaNiO <sub>3</sub><br>R3c<br>$\alpha = \beta = \gamma = 90^\circ$<br>a, c | NiO<br>R3m<br>$\alpha = \beta = \gamma = 90^\circ$<br>a, c | Impurities                     | GOF  | Rwp  |
|-------------------------------------------------|-----------|--------------------------------------------------------------------------------------------|--------------------------------------------------------------------------------------------------------------|------------------------------------------------------------------------------------------------------------|---------------------------------------------------------------------------|------------------------------------------------------------|--------------------------------|------|------|
| La <sub>2</sub> NiO <sub>4</sub>                | 800       | a=3.86523(16);<br>c=12.6252(6)                                                             | —                                                                                                            | —                                                                                                          | —                                                                         | a=2.954(2);<br>c=7.222(11)                                 | La <sub>2</sub> O <sub>3</sub> | 1.34 | 5.14 |
|                                                 | 900       | a=3.86038(8);<br>c=12.6563(5)                                                              | —                                                                                                            | —                                                                                                          | —                                                                         | —                                                          | La <sub>2</sub> O <sub>3</sub> | 1.43 | 5.54 |
|                                                 | 1000      | a=3.87100(7);<br>c=12.6646(4)                                                              | —                                                                                                            | —                                                                                                          | —                                                                         | —                                                          | La <sub>2</sub> O <sub>3</sub> | 2.11 | 7.80 |
|                                                 | 1100      | a=3.86678(6);<br>c=12.6564(4)                                                              | —                                                                                                            | —                                                                                                          | —                                                                         | —                                                          | La <sub>2</sub> O <sub>3</sub> | 1.81 | 7.05 |
| La <sub>3</sub> Ni <sub>2</sub> O <sub>7</sub>  | 800       | a=3.86515(12);<br>c=12.6272(5)                                                             | —                                                                                                            | —                                                                                                          | —                                                                         | a=2.953(13);<br>c=7.23(7)                                  | La <sub>2</sub> O <sub>3</sub> | 1.33 | 4.81 |
|                                                 | 900       | a=3.85300(8);<br>c=12.6347(5)                                                              | a=5.3920(10), b=5.4496(12);<br>c=20.515(4)                                                                   | —                                                                                                          | —                                                                         | a=2.95(3);<br>c=7.23(13)                                   | —                              | 1.38 | 5.02 |
|                                                 | 1000      | a=3.86388(11);<br>c=12.6334(5)                                                             | a=5.399(2), b=5.456(3);<br>c=20.577(9)                                                                       | —                                                                                                          | —                                                                         | a=2.9513(15);<br>c=7.238(7)                                | —                              | 1.19 | 4.28 |
|                                                 | 1100      | a=3.85920(6);<br>c=12.6259(4)                                                              | a=5.4032(14), b=5.4562(18);<br>c=20.622(6)                                                                   | —                                                                                                          | —                                                                         | a=2.9485(17);<br>c=7.276(9)                                | —                              | 1.34 | 5.18 |
| La <sub>4</sub> Ni <sub>3</sub> O <sub>10</sub> | 800       | a=3.8707(14);<br>c=12.6724(9)                                                              | —                                                                                                            | a=5.421(4), b=5.477(4);<br>c=27.61(5)                                                                      | —                                                                         | a=2.960(16);<br>c=7.249(8)                                 | —                              | 2.18 | 7.33 |
|                                                 | 900       | a=3.8577(3);<br>c=12.672(2)                                                                | a=5.4060(5), b=5.4624(6);<br>c=20.529(2)                                                                     | —                                                                                                          | —                                                                         | a=2.956(2);<br>c=7.27(13)                                  | —                              | 2.24 | 7.52 |
|                                                 | 1000      | a=3.8684(2);<br>c=12.665(12)                                                               | a=5.4031(3), b=5.4568(4);<br>c=20.529(12)                                                                    | —                                                                                                          | —                                                                         | a=2.957(4);<br>c=7.26(2)                                   | —                              | 1.52 | 5.58 |
|                                                 | 1100      | a=3.86539(6);<br>c=12.6464(6)                                                              | a=5.405(15), b=5.476(2);<br>c=20.641(6)                                                                      | —                                                                                                          | —                                                                         | a=2.955(2);<br>c=7.25(11)                                  | —                              | 2.08 | 8.05 |
| La <sub>6</sub> Ni <sub>5</sub> O <sub>16</sub> | 800       | a=3.86676(14);<br>c=12.6590(9)                                                             | —                                                                                                            | a=5.425(4), b=5.475(4);<br>c=27.45(2)                                                                      | —                                                                         | a=2.9601(10);<br>c=7.227(5)                                | —                              | 1.95 | 6.93 |
|                                                 | 900       | a=3.8617(4);<br>c=12.665(2)                                                                | a=5.4087(5), b=5.4587(5);<br>c=20.4933(18)                                                                   | —                                                                                                          | —                                                                         | a=2.9603(19);<br>c=7.231(9)                                | —                              | 1.85 | 6.31 |
|                                                 | 1000      | a=3.8657(7);<br>c=12.680(4)                                                                | a=5.4031(4), b=5.4561(4);<br>c=20.4989(16)                                                                   | —                                                                                                          | —                                                                         | a=2.9607(11);<br>c=7.217(5)                                | —                              | 2.06 | 7.42 |
|                                                 | 1100      | a=3.86283(11);<br>c=12.6522(7)                                                             | a=5.4130(8), b=5.4729(10);<br>c=20.691(3)                                                                    | —                                                                                                          | —                                                                         | a=2.958(16);<br>c=7.25(8)                                  | —                              | 2.17 | 7.97 |
| LaNiO <sub>3</sub>                              | 800       | a=3.8669(17);<br>c=12.662(10)                                                              | —                                                                                                            | a=5.425(3), b=5.467(3);<br>c=27.859(8)                                                                     | —                                                                         | a=2.9602(7);<br>c=7.226(4)                                 | —                              | 1.58 | 5.34 |
|                                                 | 900       | a=3.8599(2);<br>c=12.657(13)                                                               | a=5.4067(4), b=5.4580(4);<br>c=20.476(18)                                                                    | —                                                                                                          | —                                                                         | a=2.9526(6);<br>c=7.262(3)                                 | —                              | 1.70 | 6.04 |
|                                                 | 1000      | a=3.8682(2);<br>c=12.668(15)                                                               | a=5.4046(3), b=5.4579(3);<br>c=20.489(16)                                                                    | —                                                                                                          | —                                                                         | a=2.955(2);<br>c=7.248(2)                                  | —                              | 1.89 | 6.53 |
|                                                 | 1100      | a=3.86168(7);<br>c=12.6441(4)                                                              | a=5.4105(6), b=5.4647(6);<br>c=20.665(3)                                                                     | —                                                                                                          | —                                                                         | a=2.9548(6);<br>c=7.243(3)                                 | —                              | 1.86 | 6.51 |

Table 0.4: NaI flux: phase metrics vs targeted homology composition and temperature (part 1).

| Target                    | T<br>(°C)                          | $\text{La}_2\text{NiO}_4$<br>I4/mmm<br>$\alpha = \beta = \gamma = 90^\circ$<br>a, c | $\text{La}_3\text{Ni}_2\text{O}_{6.92}$<br>Fmmm<br>$\alpha = \beta = \gamma = 90^\circ$<br>a, b, c | $\text{La}_4\text{Ni}_3\text{O}_{10}$<br>Fmmm<br>$\alpha = \beta = \gamma = 90^\circ$<br>a, b, c | $\text{LaNiO}_3$<br>R3c<br>$\alpha = \beta = \gamma = 90^\circ$<br>a, c | NiO<br>R3m<br>$\alpha = \beta = \gamma = 90^\circ$<br>a, c | Impurities                                         | GOF                                                | Rwp   |      |
|---------------------------|------------------------------------|-------------------------------------------------------------------------------------|----------------------------------------------------------------------------------------------------|--------------------------------------------------------------------------------------------------|-------------------------------------------------------------------------|------------------------------------------------------------|----------------------------------------------------|----------------------------------------------------|-------|------|
| $\text{La}_2\text{NiO}_4$ | 700                                | a=3.8336(3);<br>c=12.6670(15)                                                       | a=5.42(6), b=5.42(6);<br>c=20.767(6)                                                               | —                                                                                                | a=5.4629(6);<br>c=13.230(3)                                             | —                                                          | $\text{La}_2\text{O}_3$ ; $\text{La}(\text{OH})_3$ | 1.67                                               | 6.10  |      |
|                           |                                    | a=3.8351(5);<br>c=12.667(3)                                                         | a=5.46(5), b=5.46(5);<br>c=20.195(14)                                                              | —                                                                                                | a=5.4714(4);<br>c=13.214(3)                                             | —                                                          | $\text{La}_2\text{O}_3$ ; $\text{La}(\text{OH})_3$ | 1.57                                               | 5.84  |      |
|                           | 800                                | a=3.8301(3);<br>c=12.687(2)                                                         | a=5.415(3), b=5.442(3);<br>c=20.50(1)                                                              | —                                                                                                | a=5.4681(8);<br>c=13.232(4)                                             | —                                                          | $\text{La}_2\text{O}_3$ ; $\text{La}(\text{OH})_3$ | 1.60                                               | 5.96  |      |
|                           | 850                                | a=3.83488(8);<br>c=12.6682(5)                                                       | a=5.43(5), b=5.44(5);<br>c=20.360(14)                                                              | —                                                                                                | —                                                                       | —                                                          | $\text{La}_2\text{O}_3$ ; $\text{La}(\text{OH})_3$ | 1.72                                               | 6.53  |      |
|                           | 900                                | a=3.83236(7);<br>c=12.6842(4)                                                       | —                                                                                                  | —                                                                                                | —                                                                       | —                                                          | —                                                  | 1.94                                               | 7.70  |      |
|                           | 950                                | a=3.83379(5);<br>c=12.6825(3)                                                       | —                                                                                                  | —                                                                                                | —                                                                       | —                                                          | $\text{La}_2\text{O}_3$                            | 1.83                                               | 6.70  |      |
|                           | 1000                               | a=3.82946(5);<br>c=12.6494(3)                                                       | —                                                                                                  | —                                                                                                | —                                                                       | —                                                          | $\text{La}_2\text{O}_3$                            | 1.83                                               | 15.58 |      |
|                           | 1100                               | a=3.83745(5);<br>c=12.6631(3)                                                       | —                                                                                                  | —                                                                                                | —                                                                       | —                                                          | $\text{La}_2\text{O}_3$                            | 1.88                                               | 7.56  |      |
|                           | $\text{La}_3\text{Ni}_2\text{O}_7$ | 700                                                                                 | a=3.8285(4);<br>c=12.6650(18)                                                                      | a=5.410(2), b=5.455(3);<br>c=20.615(8)                                                           | —                                                                       | a=5.4631(4);<br>c=13.212(2)                                | a=2.963(2);<br>c=7.187(11)                         | $\text{La}_2\text{O}_3$ ; $\text{La}(\text{OH})_3$ | 1.68  | 5.98 |
|                           |                                    |                                                                                     | a=3.835(14);<br>c=12.644(7)                                                                        | a=5.395(3), b=5.459(3);<br>c=20.46(10)                                                           | —                                                                       | a=5.4654(4);<br>c=13.204(2)                                | —                                                  | $\text{La}(\text{OH})_3$                           | 1.63  | 6.14 |
|                           |                                    | 800                                                                                 | a=3.8317(5);<br>c=12.677(2)                                                                        | a=5.402(3), b=5.445(3);<br>c=20.181(7)                                                           | —                                                                       | a=5.4639(6);<br>c=13.202(3)                                | —                                                  | $\text{La}(\text{OH})_3$                           | 1.49  | 5.33 |
| 850                       |                                    | a=3.8336(2);<br>c=12.6604(9)                                                        | a=5.420(4), b=5.448(4);<br>c=20.112(12)                                                            | —                                                                                                | a=5.4664(6);<br>c=13.264(3)                                             | —                                                          | $\text{La}_2\text{O}_3$                            | 2.08                                               | 7.06  |      |
| 900                       |                                    | a=3.8275(2);<br>c=12.6524(8)                                                        | a=5.4(5), b=5.4(5);<br>c=20.477(11)                                                                | a=5.4139(11), b=5.4551(11);<br>c=27.965(5)                                                       | a=5.4532(6);<br>c=13.184(3)                                             | —                                                          | —                                                  | 1.51                                               | 5.34  |      |
| 950                       |                                    | a=3.83802(18);<br>c=12.6821(10)                                                     | —                                                                                                  | a=5.4271(4), b=5.4687(4);<br>c=28.0503(19)                                                       | —                                                                       | —                                                          | —                                                  | 1.85                                               | 6.35  |      |
| 1000                      |                                    | a=3.8288(11);<br>c=12.6450(5)                                                       | —                                                                                                  | a=5.4145(5), b=5.4566(5);<br>c=27.993(2)                                                         | —                                                                       | —                                                          | —                                                  | 1.92                                               | 15.49 |      |
| 1100                      |                                    | a=3.83091(8);<br>c=12.6469(4)                                                       | —                                                                                                  | —                                                                                                | —                                                                       | a=2.9537(6);<br>c=7.224(3)                                 | —                                                  | 1.53                                               | 5.96  |      |

Table 0.5: NaI flux: phase metrics vs targeted homology composition and temperature (part 2).

| Target                                          | T<br>(°C)                                       | La <sub>2</sub> NiO <sub>4</sub><br>I4/mmm<br>$\alpha = \beta = \gamma = 90^\circ$<br>a, c | La <sub>3</sub> Ni <sub>2</sub> O <sub>6.92</sub><br>Fmmm<br>$\alpha = \beta = \gamma = 90^\circ$<br>a, b, c | La <sub>4</sub> Ni <sub>3</sub> O <sub>10</sub><br>Fmmm<br>$\alpha = \beta = \gamma = 90^\circ$<br>a, b, c | LaNiO <sub>3</sub><br>R3c<br>$\alpha = \beta = \gamma = 90^\circ$<br>a, c | NiO<br>R3m<br>$\alpha = \beta = \gamma = 90^\circ$<br>a, c | Impurities | GOF  | Rwp   |      |
|-------------------------------------------------|-------------------------------------------------|--------------------------------------------------------------------------------------------|--------------------------------------------------------------------------------------------------------------|------------------------------------------------------------------------------------------------------------|---------------------------------------------------------------------------|------------------------------------------------------------|------------|------|-------|------|
| La <sub>4</sub> Ni <sub>3</sub> O <sub>10</sub> | 700                                             | a=3.8319(6);<br>c=12.644(3)                                                                | a=5.412(2), b=5.449(2);<br>c=20.439(7)                                                                       | —                                                                                                          | a=5.4688(6);<br>c=13.212(2)                                               | a=2.951(3);<br>c=7.24(2)                                   | —          | 1.76 | 6.21  |      |
|                                                 |                                                 | a=3.843(15);<br>c=12.645(8)                                                                | —                                                                                                            | —                                                                                                          | a=5.4727(3);<br>c=13.218(13)                                              | —                                                          | —          | 1.95 | 6.67  |      |
|                                                 | a=3.8304(4);<br>c=12.6810(19)                   | —                                                                                          | —                                                                                                            | a=5.4637(3);<br>c=13.194(2)                                                                                | —                                                                         | —                                                          | —          | 1.76 | 6.40  |      |
|                                                 | a=3.8380(3);<br>c=12.670(15)                    | —                                                                                          | a=5.418(15), b=5.466(16);<br>c=28.039(7)                                                                     | a=5.4665(5);<br>c=13.220(2)                                                                                | —                                                                         | —                                                          | —          | 1.69 | 5.99  |      |
|                                                 | a=3.8353(4);<br>c=12.670(2)                     | —                                                                                          | a=5.4223(7), b=5.4623(7);<br>c=28.053(3)                                                                     | a=5.4659(4);<br>c=13.212(16)                                                                               | —                                                                         | a=2.9594(7);<br>c=7.210(3)                                 | —          | 1.85 | 6.67  |      |
|                                                 | a=3.870(12);<br>c=12.547(7)                     | —                                                                                          | a=5.4222(3), b=5.4666(3);<br>c=28.043(17)                                                                    | —                                                                                                          | —                                                                         | —                                                          | —          | 2.24 | 8.16  |      |
|                                                 | a=3.8293(5);<br>c=12.633(3)                     | —                                                                                          | a=5.4134(4), b=5.4567(4);<br>c=27.986(2)                                                                     | —                                                                                                          | —                                                                         | —                                                          | —          | 2.08 | 16.27 |      |
|                                                 | a=3.83664(7);<br>c=12.6708(4)                   | —                                                                                          | —                                                                                                            | —                                                                                                          | —                                                                         | a=2.9654(7);<br>c=7.250(4)                                 | —          | 2.18 | 8.13  |      |
|                                                 | La <sub>6</sub> Ni <sub>5</sub> O <sub>16</sub> | 700                                                                                        | a=3.8367(7);<br>c=12.655(4)                                                                                  | a=5.419(3), b=5.461(3);<br>c=20.450(9)                                                                     | —                                                                         | a=5.4683(3);<br>c=13.209(14)                               | —          | —    | 1.64  | 5.58 |
|                                                 |                                                 |                                                                                            | a=3.833(12);<br>c=12.675(5)                                                                                  | —                                                                                                          | —                                                                         | a=5.4657(2);<br>c=13.187(12)                               | —          | —    | —     | 1.86 |
|                                                 |                                                 | a=3.8272(6);<br>c=12.632(3)                                                                | —                                                                                                            | a=5.42(4), b=5.44(5);<br>c=27.80(14)                                                                       | a=5.4490(6);<br>c=13.1475(16)                                             | —                                                          | —          | —    | 1.28  | 4.36 |
|                                                 |                                                 | a=3.843(13);<br>c=12.643(6)                                                                | —                                                                                                            | a=5.415(12), b=5.468(12);<br>c=28.047(5)                                                                   | a=5.4667(7);<br>c=13.199(13)                                              | —                                                          | —          | —    | 1.64  | 5.74 |
|                                                 |                                                 | a=3.8305(18);<br>c=12.619(8)                                                               | —                                                                                                            | a=5.4127(7), b=5.4540(8);<br>c=27.961(4)                                                                   | a=5.4543(7);<br>c=13.165(2)                                               | —                                                          | —          | —    | 1.20  | 4.49 |
|                                                 |                                                 | —                                                                                          | —                                                                                                            | a=5.4179(2), b=5.4653(2);<br>c=28.025(15)                                                                  | —                                                                         | —                                                          | —          | —    | 1.79  | 6.68 |
| a=3.828(13);<br>c=12.618(6)                     |                                                 | —                                                                                          | a=5.4128(2), b=5.4588(2);<br>c=27.978(12)                                                                    | —                                                                                                          | —                                                                         | —                                                          | —          | 2.08 | 15.89 |      |
| a=3.83048(10);<br>c=12.6461(4)                  |                                                 | —                                                                                          | a=5.405(3), b=5.447(3);<br>c=28.147(12)                                                                      | —                                                                                                          | —                                                                         | a=2.9536(6);<br>c=7.223(3)                                 | —          | 1.32 | 4.87  |      |

Table 0.6: NaI flux: phase metrics vs targeted homology composition and temperature (part 3).

| Target                                            | T<br>(°C)          | La <sub>2</sub> NiO <sub>4</sub><br>I4/mmm<br>$\alpha = \beta = \gamma = 90^\circ$<br>a, c | La <sub>3</sub> Ni <sub>2</sub> O <sub>6.92</sub><br>Fmmm<br>$\alpha = \beta = \gamma = 90^\circ$<br>a, b, c | La <sub>4</sub> Ni <sub>3</sub> O <sub>10</sub><br>Fmmm<br>$\alpha = \beta = \gamma = 90^\circ$<br>a, b, c | LaNiO <sub>3</sub><br>R3c<br>$\alpha = \beta = \gamma = 90^\circ$<br>a, c | NiO<br>R3m<br>$\alpha = \beta = \gamma = 90^\circ$<br>a, c | Impurities                  | GOF                         | Rwp   |      |
|---------------------------------------------------|--------------------|--------------------------------------------------------------------------------------------|--------------------------------------------------------------------------------------------------------------|------------------------------------------------------------------------------------------------------------|---------------------------------------------------------------------------|------------------------------------------------------------|-----------------------------|-----------------------------|-------|------|
| La <sub>13</sub> Ni <sub>12</sub> O <sub>37</sub> | 700                | a=3.846(12);<br>c=12.571(6)                                                                | a=5.404(3), b=5.464(3);<br>c=20.446(9)                                                                       | —                                                                                                          | a=5.4724(4);<br>c=13.236(16)                                              | —                                                          | —                           | 1.64                        | 5.71  |      |
|                                                   | 750                | —                                                                                          | —                                                                                                            | —                                                                                                          | a=5.4627(2);<br>c=13.177(11)                                              | —                                                          | —                           | 1.59                        | 5.62  |      |
|                                                   | 800                | —                                                                                          | —                                                                                                            | —                                                                                                          | a=5.4665(2);<br>c=13.183(10)                                              | —                                                          | —                           | 1.67                        | 5.68  |      |
|                                                   | 850                | —                                                                                          | —                                                                                                            | a=5.403(2), b=5.468(2);<br>c=27.993(7)                                                                     | a=5.4706(2);<br>c=13.198(13)                                              | —                                                          | —                           | 1.79                        | 6.06  |      |
|                                                   | 900                | —                                                                                          | —                                                                                                            | a=5.4155(8), b=5.4636(8);<br>c=28.047(3)                                                                   | a=5.4705(6);<br>c=13.203(2)                                               | —                                                          | a=2.96(8);<br>c=7.240(8)    | 1.68                        | 6.06  |      |
|                                                   | 950                | —                                                                                          | —                                                                                                            | a=5.4207(4), b=5.4665(2);<br>c=28.0902(13)                                                                 | a=5.4761(9);<br>c=13.190(3)                                               | —                                                          | a=2.955(4);<br>c=7.24(2)    | 1.78                        | 6.61  |      |
|                                                   | 1000               | a=3.829(2);<br>c=12.614(9)                                                                 | —                                                                                                            | a=5.4140(3), b=5.4600(3);<br>c=27.976(15)                                                                  | —                                                                         | —                                                          | a=2.9504(5);<br>c=7.254(3)  | 1.71                        | 13.88 |      |
|                                                   | 1100               | a=3.83672(7);<br>c=12.6674(4)                                                              | —                                                                                                            | a=5.437(4), b=5.445(3);<br>c=28.09(13)                                                                     | —                                                                         | —                                                          | a=2.9560(6);<br>c=7.247(3)  | 1.88                        | 6.68  |      |
|                                                   | LaNiO <sub>3</sub> | 700                                                                                        | a=3.8378(6);<br>c=12.626(3)                                                                                  | a=5.417(3), b=5.454(3);<br>c=20.523(7)                                                                     | —                                                                         | a=5.4675(4);<br>c=13.223(2)                                | —                           | —                           | 1.70  | 5.68 |
|                                                   |                    | 750                                                                                        | —                                                                                                            | —                                                                                                          | —                                                                         | a=5.4662(3);<br>c=13.198(11)                               | —                           | —                           | 1.62  | 5.80 |
|                                                   |                    | 800                                                                                        | —                                                                                                            | —                                                                                                          | —                                                                         | a=5.4666(15);<br>c=13.1837(9)                              | —                           | —                           | 1.72  | 5.69 |
| 850                                               |                    | —                                                                                          | —                                                                                                            | a=5.431(5), b=5.452(5);<br>c=27.87(13)                                                                     | a=5.4610(2);<br>c=13.168(10)                                              | —                                                          | —                           | 1.54                        | 5.51  |      |
| 900                                               |                    | —                                                                                          | —                                                                                                            | a=5.4156(6), b=5.4612(6);<br>c=28.000(3)                                                                   | a=5.4626(2);<br>c=13.18(10)                                               | —                                                          | a=2.952(17);<br>c=7.246(8)  | 1.40                        | 4.91  |      |
| 950                                               |                    | —                                                                                          | —                                                                                                            | a=5.4197(3), b=5.4667(3);<br>c=28.019(16)                                                                  | a=5.467(12);<br>c=13.207(4)                                               | —                                                          | a=2.952(17);<br>c=7.24(5)   | 2.01                        | 6.97  |      |
| 1000                                              |                    | a=3.8256(4);<br>c=12.642(2)                                                                | —                                                                                                            | a=5.4126(3), b=4.4583(3);<br>c=27.951(13)                                                                  | —                                                                         | —                                                          | a=2.9549(8);<br>c=7.222(4)  | 1.63                        | 12.99 |      |
| 1100                                              |                    | a=3.83538(5);<br>c=12.6610(3)                                                              | —                                                                                                            | a=5.425(12), b=5.459(11);<br>c=28.031(5)                                                                   | —                                                                         | —                                                          | a=2.9542(3);<br>c=7.247(16) | 1.91                        | 6.79  |      |
| LaNi <sub>1.2</sub> O <sub>3</sub>                |                    | 700                                                                                        | a=3.8394(18);<br>c=12.625(9)                                                                                 | a=5.435(7), b=5.485(7);<br>c=20.364(19)                                                                    | —                                                                         | a=5.4678(2);<br>c=13.2068(14)                              | —                           | a=2.9575(7);<br>c=7.224(4)  | 1.54  | 5.04 |
|                                                   |                    | 750                                                                                        | —                                                                                                            | —                                                                                                          | —                                                                         | a=5.4587(5);<br>c=13.1716(13)                              | —                           | a=2.9538(7);<br>c=7.225(3)  | 1.70  | 5.66 |
|                                                   |                    | 800                                                                                        | —                                                                                                            | —                                                                                                          | —                                                                         | a=5.4591(5);<br>c=13.1693(13)                              | —                           | a=2.9551(10);<br>c=7.219(5) | 1.59  | 5.61 |
|                                                   | 850                | —                                                                                          | —                                                                                                            | —                                                                                                          | a=5.45288(16);<br>c=13.1437(8)                                            | —                                                          | a=2.9515(10);<br>c=7.218(5) | 1.55                        | 5.51  |      |
|                                                   | 900                | —                                                                                          | —                                                                                                            | a=5.4117(19), b=5.4588(6);<br>c=27.968(7)                                                                  | a=5.4626(3);<br>c=13.1885(10)                                             | —                                                          | a=2.9568(4);<br>c=7.228(2)  | 1.49                        | 4.93  |      |
|                                                   | 950                | —                                                                                          | —                                                                                                            | a=5.4185(5), b=5.4670(3);<br>c=28.0086(19)                                                                 | a=5.4661(4);<br>c=13.1941(14)                                             | —                                                          | a=2.9583(5);<br>c=7.225(2)  | 1.72                        | 5.68  |      |
|                                                   | 1000               | a=3.8293(3);<br>c=12.6566(9)                                                               | —                                                                                                            | a=5.4150(5), b=5.4600(5);<br>c=27.982(2)                                                                   | —                                                                         | —                                                          | a=2.9561(3);<br>c=7.226(16) | 1.60                        | 11.87 |      |
|                                                   | 1100               | a=3.8305(4);<br>c=12.621(2)                                                                | —                                                                                                            | a=5.4239(15), b=5.4495(17);<br>c=27.881(6)                                                                 | a=5.4515(3);<br>c=13.1693(14)                                             | —                                                          | a=2.9480(6);<br>c=7.230(3)  | 1.82                        | 5.81  |      |

Table 0.7: KCl flux: phase metrics vs targeted homology composition and temperature.

| Target                                          | T<br>(°C) | La <sub>2</sub> NiO <sub>4</sub><br>I4/mmm<br>$\alpha = \beta = \gamma = 90^\circ$<br>a, c | La <sub>3</sub> Ni <sub>2</sub> O <sub>6.92</sub><br>Fmmm<br>$\alpha = \beta = \gamma = 90^\circ$<br>a, b, c | La <sub>4</sub> Ni <sub>3</sub> O <sub>10</sub><br>Fmmm<br>$\alpha = \beta = \gamma = 90^\circ$<br>a, b, c | LaNiO <sub>3</sub><br>R $\bar{3}c$<br>$\alpha = \beta = \gamma = 90^\circ$<br>a, c | NiO<br>R $\bar{3}m$<br>$\alpha = \beta = \gamma = 90^\circ$<br>a, c | Impurities | GOF  | Rwp  |
|-------------------------------------------------|-----------|--------------------------------------------------------------------------------------------|--------------------------------------------------------------------------------------------------------------|------------------------------------------------------------------------------------------------------------|------------------------------------------------------------------------------------|---------------------------------------------------------------------|------------|------|------|
| La <sub>2</sub> NiO <sub>4</sub>                | 800       | a=3.8700(2);<br>c=12.6425(13)                                                              | —                                                                                                            | —                                                                                                          | —                                                                                  | —                                                                   | KCl        | 1.50 | 6.48 |
|                                                 | 900       | a=3.86752(6);<br>c=12.6476(4)                                                              | —                                                                                                            | —                                                                                                          | —                                                                                  | —                                                                   | —          | 1.54 | 6.19 |
|                                                 | 1000      | a=3.86761(6);<br>c=12.6484(4)                                                              | —                                                                                                            | —                                                                                                          | —                                                                                  | —                                                                   | —          | 1.56 | 5.95 |
|                                                 | 1100      | a=3.86478(8);<br>c=12.6397(3)                                                              | —                                                                                                            | —                                                                                                          | —                                                                                  | —                                                                   | —          | 1.77 | 6.71 |
| La <sub>3</sub> Ni <sub>2</sub> O <sub>7</sub>  | 800       | a=3.86920(16);<br>c=12.6461(7)                                                             | —                                                                                                            | —                                                                                                          | —                                                                                  | a=2.9506(12);<br>c=7.255(6)                                         | LaOCl; KCl | 1.37 | 5.81 |
|                                                 | 900       | a=3.86967(11);<br>c=12.6683(7)                                                             | a=5.4022(4), b=5.4546(4);<br>c=20.5046(18)                                                                   | a=5.4093(16), b=5.4661(17);<br>c=28.149(7)                                                                 | —                                                                                  | a=2.957(2);<br>c=7.237(10)                                          | LaOCl      | 1.53 | 5.64 |
| La <sub>4</sub> Ni <sub>3</sub> O <sub>10</sub> | 1000      | a=3.8684(4);<br>c=12.665(2)                                                                | a=5.3966(4), b=5.4565(4);<br>c=20.562(16)                                                                    | —                                                                                                          | —                                                                                  | a=2.958(4);<br>c=7.24(18)                                           | LaOCl      | 1.99 | 7.62 |
|                                                 | 1100      | a=3.86471(13);<br>c=12.6390(6)                                                             | a=5.4049(7), b=5.4588(9);<br>c=20.644(3)                                                                     | —                                                                                                          | —                                                                                  | a=2.943(2);<br>c=7.364(12)                                          | —          | 2.16 | 8.03 |
|                                                 | 800       | a=3.8709(18);<br>c=12.674(11)                                                              | —                                                                                                            | a=5.429(3), b=5.466(2);<br>c=27.67(13)                                                                     | —                                                                                  | a=2.954(11);<br>c=7.23(2)                                           | LaOCl; KCl | 1.93 | 6.77 |
| La <sub>6</sub> Ni <sub>5</sub> O <sub>16</sub> | 900       | a=3.8667(3);<br>c=12.683(2)                                                                | a=5.4070(6), b=5.4574(7);<br>c=20.447(2)                                                                     | a=5.4105(6), b=5.4611(7);<br>c=28.092(3)                                                                   | —                                                                                  | a=2.955(4);<br>c=7.260(6)                                           | LaOCl      | 1.69 | 6.13 |
|                                                 | 1000      | a=3.8663(3);<br>c=12.680(2)                                                                | a=5.3986(4), b=5.4550(4);<br>c=20.501(17)                                                                    | —                                                                                                          | —                                                                                  | a=2.954(10);<br>c=7.246(5)                                          | LaOCl      | 1.87 | 7.11 |
|                                                 | 1100      | a=3.8693(10);<br>c=12.6676(7)                                                              | a=5.4086(9), b=5.475(11);<br>c=20.678(4)                                                                     | —                                                                                                          | —                                                                                  | a=2.9582(8);<br>c=7.244(4)                                          | —          | 2.36 | 8.93 |
|                                                 | 800       | a=3.8694(2);<br>c=12.656(13)                                                               | —                                                                                                            | a=5.427(6), b=5.453(6);<br>c=27.39(13)                                                                     | —                                                                                  | a=2.956(2);<br>c=7.21(11)                                           | —          | 1.17 | 3.96 |
| LaNiO <sub>3</sub>                              | 900       | a=3.8676(4);<br>c=12.675(2)                                                                | a=5.412(11), b=5.457(10);<br>c=20.402(4)                                                                     | a=5.4146(6), b=5.4645(6);<br>c=28.024(3)                                                                   | a=5.4669(8);<br>c=13.177(3)                                                        | a=2.9503(6);<br>c=7.257(3)                                          | LaOCl      | 1.42 | 5.50 |
|                                                 | 1000      | —                                                                                          | a=5.4008(5), b=5.4554(5);<br>c=20.503(2)                                                                     | —                                                                                                          | a=5.643(7);<br>c=13.165(2)                                                         | a=2.956(3);<br>c=7.25(17)                                           | LaOCl      | 2.27 | 8.55 |
|                                                 | 1100      | a=3.86654(9);<br>c=12.6605(6)                                                              | a=5.405(10), b=5.469(12);<br>c=20.662(4)                                                                     | —                                                                                                          | —                                                                                  | a=2.9525(7);<br>c=7.251(4)                                          | —          | 2.08 | 7.32 |
|                                                 | 800       | a=3.8703(3);<br>c=12.670(16)                                                               | —                                                                                                            | a=5.417(4), b=5.461(4);<br>c=27.75(16)                                                                     | a=5.446(13);<br>c=13.487(8)                                                        | a=2.9529(9);<br>c=7.261(4)                                          | LaOCl      | 1.55 | 5.26 |
| LaNiO <sub>3</sub>                              | 900       | a=3.872(16);<br>c=12.648(9)                                                                | a=5.405(2), b=5.463(2);<br>c=20.518(8)                                                                       | a=5.418(11), b=5.463(12);<br>c=28.131(6)                                                                   | a=5.470(11);<br>c=13.194(4)                                                        | a=2.956(3);<br>c=7.23(14)                                           | LaOCl; KCl | 2.24 | 7.73 |
|                                                 | 1000      | —                                                                                          | a=5.4015(5), b=5.4578(5);<br>c=20.481(2)                                                                     | —                                                                                                          | a=5.4609(4);<br>c=13.162(14)                                                       | a=2.9580(6);<br>c=7.229(3)                                          | LaOCl      | 2.83 | 9.80 |
|                                                 | 1100      | a=3.8660(16);<br>c=12.6526(8)                                                              | a=5.4087(6), b=5.4614(7);<br>c=20.667(3)                                                                     | —                                                                                                          | —                                                                                  | a=2.9544(3);<br>c=7.237(17)                                         | —          | 2.26 | 8.28 |

Table 0.8: KBr flux: phase metrics vs targeted homology composition and temperature (I).

| Target                                | T<br>(°C)                     | $\text{La}_2\text{NiO}_4$<br>I4/mmm<br>$\alpha = \beta = \gamma = 90^\circ$<br>a, c | $\text{La}_3\text{Ni}_2\text{O}_{6.92}$<br>Fmmm<br>$\alpha = \beta = \gamma = 90^\circ$<br>a, b, c | $\text{La}_4\text{Ni}_3\text{O}_{10}$<br>Fmmm<br>$\alpha = \beta = \gamma = 90^\circ$<br>a, b, c | $\text{LaNiO}_3$<br>R $\bar{3}c$<br>$\alpha = \beta = \gamma = 90^\circ$<br>a, c | NiO<br>R $\bar{3}m$<br>$\alpha = \beta = \gamma = 90^\circ$<br>a, c | Impurities                                         | GOF  | Rwp  |
|---------------------------------------|-------------------------------|-------------------------------------------------------------------------------------|----------------------------------------------------------------------------------------------------|--------------------------------------------------------------------------------------------------|----------------------------------------------------------------------------------|---------------------------------------------------------------------|----------------------------------------------------|------|------|
| $\text{La}_2\text{NiO}_4$             | 800                           | a=3.8706(3);<br>c=12.6698(18)                                                       | a=5.427(8), b=5.481(8);<br>c=20.20(2)                                                              | —                                                                                                | —                                                                                | a=2.9586(6);<br>c=7.232(3)                                          | $\text{La}_2\text{O}_3$ ; $\text{La}(\text{OH})_3$ | 1.49 | 5.41 |
|                                       | 900                           | a=3.86954(8);<br>c=12.6752(5)                                                       | a=5.404(2), b=5.484(3);<br>c=20.441(9)                                                             | —                                                                                                | —                                                                                | —                                                                   | $\text{La}_2\text{O}_3$                            | 1.70 | 6.51 |
|                                       | 1000                          | a=3.86571(6);<br>c=12.6949(4)                                                       | —                                                                                                  | —                                                                                                | —                                                                                | —                                                                   | —                                                  | 2.19 | 8.76 |
|                                       | 1100                          | a=3.86890(6);<br>c=12.6635(4)                                                       | —                                                                                                  | —                                                                                                | —                                                                                | —                                                                   | $\text{La}_2\text{O}_3$                            | 1.68 | 6.48 |
| $\text{La}_3\text{Ni}_2\text{O}_7$    | 800                           | a=3.87023(14);<br>c=12.6739(8)                                                      | a=5.425(6), b=5.475(6);<br>c=20.204(16)                                                            | a=5.422(3), b=5.458(3);<br>c=27.463(14)                                                          | —                                                                                | a=2.9544(7);<br>c=7.254(4)                                          | $\text{La}_2\text{O}_3$ ; $\text{La}(\text{OH})_3$ | 1.29 | 4.30 |
|                                       | 900                           | a=3.86964(8);<br>c=12.6812(6)                                                       | a=5.4059(6), b=5.4584(5);<br>c=20.514(2)                                                           | —                                                                                                | —                                                                                | a=2.956(2);<br>c=7.246(10)                                          | —                                                  | 1.86 | 6.48 |
|                                       | 1000                          | a=3.87267(9);<br>c=12.6625(6)                                                       | a=5.40187(7), b=5.4656(8);<br>c=20.572(3)                                                          | —                                                                                                | —                                                                                | a=2.963(9);<br>c=7.24(5)                                            | —                                                  | 1.96 | 6.62 |
|                                       | 1100                          | a=3.87022(8);<br>c=12.6617(5)                                                       | a=5.3995(3), b=5.4539(4);<br>c=20.5612(14)                                                         | —                                                                                                | —                                                                                | a=2.961(2);<br>c=7.223(12)                                          | —                                                  | 1.48 | 5.73 |
| $\text{La}_4\text{Ni}_3\text{O}_{10}$ | 800                           | a=3.8701(15);<br>c=12.6795(9)                                                       | —                                                                                                  | a=5.421(17), b=5.4883(2);<br>c=27.965(8)                                                         | —                                                                                | a=2.96(13);<br>c=7.233(7)                                           | $\text{La}_2\text{O}_3$                            | 1.90 | 6.51 |
|                                       | 900                           | a=3.8687(2);<br>c=12.68(13)                                                         | a=5.4058(3), b=5.4571(3);<br>c=20.54(13)                                                           | —                                                                                                | —                                                                                | a=2.96(1);<br>c=7.27(5)                                             | —                                                  | 1.64 | 5.91 |
|                                       | 1000                          | a=3.8740(12);<br>c=12.6660(8)                                                       | a=5.4021(3), b=5.4573(3);<br>c=20.55(13)                                                           | —                                                                                                | —                                                                                | a=2.96(12);<br>c=7.23(6)                                            | —                                                  | 2.25 | 7.75 |
|                                       | 1100                          | a=3.86940(9);<br>c=12.6563(6)                                                       | a=5.3969(3), b=5.4519(4);<br>c=20.553(14)                                                          | —                                                                                                | —                                                                                | a=2.9528(5);<br>c=7.245(3)                                          | —                                                  | 1.66 | 6.11 |
| $\text{La}_6\text{Ni}_5\text{O}_{16}$ | 800                           | a=3.8725(2);<br>c=12.6810(14)                                                       | —                                                                                                  | a=5.4228(17), b=5.4798(19);<br>c=28.077(8)                                                       | —                                                                                | a=2.9620(14);<br>c=7.231(7)                                         | $\text{La}_2\text{O}_3$                            | 2.11 | 7.18 |
|                                       | 900                           | a=3.8675(7);<br>c=12.697(4)                                                         | a=5.4100(4), b=5.4587(4);<br>c=20.5211(14)                                                         | —                                                                                                | —                                                                                | a=2.9614(15);<br>c=7.223(8)                                         | —                                                  | 1.91 | 6.67 |
| 1000                                  | a=3.8681(2);<br>c=12.6508(14) | a=5.3955(3), b=5.4507(3);<br>c=20.5011(11)                                          | —                                                                                                  | —                                                                                                | —                                                                                | a=2.9571(10);<br>c=7.218(5)                                         | —                                                  | 1.86 | 6.87 |
|                                       | 1100                          | a=3.87068(9);<br>c=12.6680(6)                                                       | a=5.4017(4), b=5.4558(4);<br>c=20.5674(15)                                                         | —                                                                                                | —                                                                                | a=2.9586(9);<br>c=7.234(5)                                          | —                                                  | 1.85 | 6.62 |
| $\text{LaNiO}_3$                      | 800                           | a=3.8695(13);<br>c=12.6716(6)                                                       | —                                                                                                  | a=5.417(3), b=5.482(4);<br>c=28.08(14)                                                           | —                                                                                | a=2.9562(3);<br>c=7.242(14)                                         | $\text{La}_2\text{O}_3$ ; $\text{La}(\text{OH})_3$ | 1.51 | 5.24 |
|                                       | 900                           | a=3.87235(8);<br>c=12.6660(5)                                                       | a=5.4041(6), b=5.4575(6);<br>c=20.568(2)                                                           | —                                                                                                | —                                                                                | a=2.9563(8);<br>c=7.251(4)                                          | —                                                  | 1.95 | 6.77 |
|                                       | 1000                          | a=3.87109(7);<br>c=12.6673(4)                                                       | a=5.3993(6), b=5.4617(7);<br>c=20.568(2)                                                           | —                                                                                                | —                                                                                | a=2.9548(8);<br>c=7.249(4)                                          | —                                                  | 2.19 | 7.29 |
|                                       | 1100                          | a=3.86428(7);<br>c=12.6431(5)                                                       | a=5.3931(2), b=5.4471(3);<br>c=20.523(11)                                                          | —                                                                                                | —                                                                                | a=2.9507(6);<br>c=7.239(3)                                          | —                                                  | 1.40 | 4.96 |

Table 0.9: KI flux: phase metrics vs targeted homology composition and temperature (I).

| Target                                          | T<br>(°C)                                       | La <sub>2</sub> NiO <sub>4</sub><br>I4/mmm<br>$\alpha = \beta = \gamma = 90^\circ$<br>a, c | La <sub>3</sub> Ni <sub>2</sub> O <sub>6.92</sub><br>Fmmm<br>$\alpha = \beta = \gamma = 90^\circ$<br>a, b, c | La <sub>4</sub> Ni <sub>3</sub> O <sub>10</sub><br>Fmmm<br>$\alpha = \beta = \gamma = 90^\circ$<br>a, b, c | LaNiO <sub>3</sub><br>R $\bar{3}c$<br>$\alpha = \beta = \gamma = 90^\circ$<br>a, c | NiO<br>R $\bar{3}m$<br>$\alpha = \beta = \gamma = 90^\circ$<br>a, c | Impurities                     | GOF  | Rwp  |      |
|-------------------------------------------------|-------------------------------------------------|--------------------------------------------------------------------------------------------|--------------------------------------------------------------------------------------------------------------|------------------------------------------------------------------------------------------------------------|------------------------------------------------------------------------------------|---------------------------------------------------------------------|--------------------------------|------|------|------|
| La <sub>2</sub> NiO <sub>4</sub>                | 800                                             | a=3.8546(15);<br>c=12.695(9)                                                               | a=5.46(3), b=5.45(3);<br>c=20.327(13)                                                                        | a=5.45(14), b=5.45(14);<br>c=27.717(18)                                                                    | —                                                                                  | a=2.9591(11);<br>c=7.230(6)                                         | La(OH) <sub>3</sub>            | 1.70 | 6.30 |      |
|                                                 | 900                                             | a=3.85086(8);<br>c=12.6812(5)                                                              | a=5.412(4), b=5.456(4);<br>c=20.305(12)                                                                      | —                                                                                                          | —                                                                                  | —                                                                   | La <sub>2</sub> O <sub>3</sub> | 1.53 | 6.09 |      |
|                                                 | 1000                                            | a=3.85553(4);<br>c=12.6680(2)                                                              | —                                                                                                            | —                                                                                                          | —                                                                                  | —                                                                   | —                              | —    | 1.55 | 5.74 |
|                                                 | 1100                                            | a=3.85311(4);<br>c=12.6688(2)                                                              | —                                                                                                            | —                                                                                                          | —                                                                                  | —                                                                   | —                              | —    | 1.38 | 5.45 |
|                                                 |                                                 | a=3.8549(7);<br>c=12.713(4)                                                                | a=5.424(6), b=5.471(6);<br>c=20.261(14)                                                                      | a=5.421(2), b=5.469(3);<br>c=27.230(13)                                                                    | —                                                                                  | a=2.9612(7);<br>c=7.223(3)                                          | La(OH) <sub>3</sub>            | 1.55 | 5.69 |      |
| La <sub>3</sub> Ni <sub>2</sub> O <sub>7</sub>  | 900                                             | a=3.8417(2);<br>c=12.6734(11)                                                              | a=5.4072(8), b=5.4489(9);<br>c=20.407(4)                                                                     | a=5.4081(9), b=5.4528(9);<br>c=28.021(4)                                                                   | —                                                                                  | —                                                                   | —                              | 1.57 | 5.60 |      |
|                                                 | 1000                                            | a=3.8485(4);<br>c=12.6811(18)                                                              | a=5.3990(5), b=5.4466(5);<br>c=20.513(2)                                                                     | a=5.4008(18), b=5.450(2);<br>c=28.221(8)                                                                   | —                                                                                  | —                                                                   | —                              | 1.73 | 6.34 |      |
|                                                 | 1100                                            | a=3.84539(9);<br>c=12.6862(4)                                                              | a=5.4037(14), b=5.4463(16);<br>c=20.523(5)                                                                   | —                                                                                                          | —                                                                                  | a=2.952(5);<br>c=7.23(3)                                            | —                              | 1.49 | 5.47 |      |
|                                                 |                                                 | a=3.8604(3);<br>c=12.700(18)                                                               | —                                                                                                            | a=5.440(6), b=5.464(6);<br>c=28.01(12)                                                                     | a=5.4751(8);<br>c=13.263(3)                                                        | a=2.953(2);<br>c=7.26(1)                                            | La(OH) <sub>3</sub>            | 1.68 | 6.06 |      |
|                                                 | La <sub>4</sub> Ni <sub>3</sub> O <sub>10</sub> | 900                                                                                        | a=3.8474(3);<br>c=12.715(19)                                                                                 | a=5.45(3), b=5.45(2);<br>c=20.398(6)                                                                       | a=5.435(11), b=5.466(12);<br>c=28.151(4)                                           | a=5.4740(6);<br>c=13.242(2)                                         | a=2.903(7);<br>c=7.276(3)      | —    | 1.61 | 5.61 |
| 1000                                            |                                                 | a=3.846(6);<br>c=12.71(12)                                                                 | a=5.4090(6), b=5.4546(6);<br>c=20.523(2)                                                                     | a=5.4124(7), b=5.4624(7);<br>c=28.112(4)                                                                   | —                                                                                  | a=2.96(18);<br>c=7.25(9)                                            | —                              | 1.70 | 6.26 |      |
| 1100                                            |                                                 | a=3.85130(6);<br>c=12.7056(4)                                                              | a=5.410(14), b=5.456(16);<br>c=20.559(5)                                                                     | —                                                                                                          | —                                                                                  | a=2.955(13);<br>c=7.247(6)                                          | —                              | 1.91 | 7.00 |      |
|                                                 |                                                 | a=3.8462(5);<br>c=12.660(3)                                                                | —                                                                                                            | a=5.4(2), b=5.4(2);<br>c=27.891(10)                                                                        | a=5.4534(10);<br>c=13.162(3)                                                       | a=2.949(7);<br>c=7.22(3)                                            | —                              | 1.61 | 5.51 |      |
| 900                                             |                                                 | —                                                                                          | a=5.4039(10), b=5.4480(10);<br>c=20.394(5)                                                                   | a=5.4055(7), b=5.4526(7);<br>c=27.975(4)                                                                   | a=5.4499(7);<br>c=13.160(3)                                                        | a=2.95(9);<br>c=7.2(4)                                              | —                              | 1.51 | 5.27 |      |
| La <sub>6</sub> Ni <sub>5</sub> O <sub>16</sub> | 1000                                            | —                                                                                          | a=5.4011(9), b=5.4480(8);<br>c=20.448(4)                                                                     | a=5.4071(7), b=5.4557(8);<br>c=28.010(5)                                                                   | —                                                                                  | a=2.95(4);<br>c=7.23(19)                                            | —                              | 1.64 | 6.00 |      |
|                                                 | 1100                                            | a=3.84642(10);<br>c=12.6813(4)                                                             | a=5.4031(12), b=5.4457(14);<br>c=20.548(5)                                                                   | —                                                                                                          | —                                                                                  | a=2.9515(13);<br>c=7.233(7)                                         | —                              | 1.63 | 5.79 |      |
|                                                 | a=3.844(3);<br>c=12.751(8)                      | —                                                                                          | a=5.422(3), b=5.463(2);<br>c=28.18(12)                                                                       | a=5.4740(7);<br>c=13.21(10)                                                                                | a=2.958(12);<br>c=7.242(6)                                                         | —                                                                   | 1.24                           | 4.58 |      |      |
| LaNiO <sub>3</sub>                              | 900                                             | —                                                                                          | a=5.428(3), b=5.442(3);<br>c=20.498(4)                                                                       | a=5.4192(2), b=5.468(10);<br>c=28.080(4)                                                                   | a=5.4697(4);<br>c=13.202(2)                                                        | a=2.9606(3);<br>c=7.231(17)                                         | —                              | 1.46 | 4.98 |      |
|                                                 | 1000                                            | —                                                                                          | a=5.4165(9), b=5.457(10);<br>c=20.496(3)                                                                     | a=5.4195(4), b=5.4687(4);<br>c=28.079(2)                                                                   | a=5.472(10);<br>c=13.190(6)                                                        | a=2.9576(3);<br>c=7.245(14)                                         | —                              | 1.74 | 5.93 |      |
|                                                 | 1100                                            | a=3.85170(12);<br>c=12.7025(8)                                                             | a=5.408(15), b=5.457(17);<br>c=20.587(6)                                                                     | —                                                                                                          | —                                                                                  | a=2.9553(5);<br>c=7.247(3)                                          | —                              | 2.09 | 7.46 |      |
|                                                 |                                                 | —                                                                                          | —                                                                                                            | —                                                                                                          | —                                                                                  | —                                                                   | —                              | —    | —    | —    |

Table 0.10: Fluxless flux: resulting weight percent (%) vs targeted homology composition, temperature, and dwell time, with average Ruddlesden–Popper nickel valence.

| Target                                          | T<br>(°C) | Dwell<br>(h) | La <sub>2</sub> NiO <sub>4</sub><br>(%) | La <sub>3</sub> Ni <sub>2</sub> O <sub>6.92</sub><br>(%) | La <sub>4</sub> Ni <sub>3</sub> O <sub>10</sub><br>(%) | LaNiO <sub>3</sub><br>(%) | NiO<br>(%) | LaOCl<br>(%) | La <sub>2</sub> O <sub>3</sub><br>(%) | La(OH) <sub>3</sub><br>(%) | Flux<br>(%) | $\bar{v}_{\text{Ni,RP}}$ |
|-------------------------------------------------|-----------|--------------|-----------------------------------------|----------------------------------------------------------|--------------------------------------------------------|---------------------------|------------|--------------|---------------------------------------|----------------------------|-------------|--------------------------|
| La <sub>2</sub> NiO <sub>4</sub>                | 800       | 12           | 12.2(6)                                 | —                                                        | —                                                      | —                         | 43.3(6)    | —            | 9.33(17)                              | 35.1(4)                    | —           | 2.00(10)                 |
|                                                 | 900       | 9            | 28.9(6)                                 | —                                                        | —                                                      | —                         | 33.1(6)    | —            | —                                     | 38.1(4)                    | —           | 2.00(4)                  |
|                                                 | 1000      | 6            | 65.2(4)                                 | —                                                        | —                                                      | —                         | 14.7(4)    | —            | —                                     | 20.14(18)                  | —           | 2.00(1)                  |
|                                                 | 1100      | 6            | 84.5(2)                                 | —                                                        | —                                                      | —                         | 6.5(2)     | —            | 5.04(6)                               | 4.00(7)                    | —           | 2.00(0)                  |
| La <sub>3</sub> Ni <sub>2</sub> O <sub>7</sub>  | 800       | 12           | 31.5(1)                                 | —                                                        | —                                                      | —                         | 34.8(7)    | —            | 8.14(19)                              | 25.5(4)                    | —           | 2.00(1)                  |
|                                                 | 900       | 9            | 33.8(7)                                 | —                                                        | —                                                      | —                         | 35.6(7)    | —            | —                                     | 30.6(4)                    | —           | 2.00(4)                  |
|                                                 | 1000      | 6            | 62.5(5)                                 | 9.8(5)                                                   | —                                                      | —                         | 17.5(4)    | —            | —                                     | 10.13(13)                  | —           | 2.08(11)                 |
|                                                 | 1100      | 6            | 82.8(4)                                 | 7.0(4)                                                   | —                                                      | —                         | 8.3(3)     | —            | 1.88(60)                              | —                          | —           | 2.05(12)                 |
| La <sub>4</sub> Ni <sub>3</sub> O <sub>10</sub> | 800       | 12           | 46.6(10)                                | —                                                        | —                                                      | —                         | 27.9(8)    | —            | —                                     | 25.5(6)                    | —           | 2.00(4)                  |
|                                                 | 900       | 9            | 51.2(11)                                | —                                                        | —                                                      | —                         | 32.2(9)    | —            | —                                     | 16.6(4)                    | —           | 2.00(4)                  |
|                                                 | 1000      | 6            | 58.8(4)                                 | 31.7(3)                                                  | —                                                      | —                         | 8.6(3)     | —            | —                                     | 0.9(1)                     | —           | 2.20(3)                  |
|                                                 | 1100      | 6            | 70.1(4)                                 | 15.8(3)                                                  | —                                                      | —                         | 13.2(3)    | —            | 0.90(4)                               | —                          | —           | 2.11(4)                  |
| La <sub>6</sub> Ni <sub>5</sub> O <sub>16</sub> | 800       | 12           | 55.6(8)                                 | —                                                        | —                                                      | —                         | 24.9(7)    | —            | 4.4(2)                                | 15.0(3)                    | —           | 2.00(3)                  |
|                                                 | 900       | 9            | 69.2(5)                                 | —                                                        | —                                                      | —                         | 18.3(6)    | —            | —                                     | 12.5(2)                    | —           | 2.00(1)                  |
|                                                 | 1000      | 6            | 33.7(4)                                 | 56.4(4)                                                  | —                                                      | —                         | 9.9(4)     | —            | —                                     | —                          | —           | 2.34(3)                  |
|                                                 | 1100      | 6            | 60.6(5)                                 | 26.0(5)                                                  | —                                                      | —                         | 13.4(3)    | —            | —                                     | —                          | —           | 2.17(5)                  |
| LaNiO <sub>3</sub>                              | 800       | 12           | 14.4(6)                                 | —                                                        | —                                                      | —                         | 53.6(5)    | —            | —                                     | 30.9(3)                    | —           | 2.00(8)                  |
|                                                 | 900       | 9            | 20.8(5)                                 | —                                                        | —                                                      | —                         | 53.2(6)    | —            | —                                     | 26.0(5)                    | —           | 2.00(5)                  |
|                                                 | 1000      | 6            | 49.5(3)                                 | 16.7(3)                                                  | —                                                      | —                         | 26.1(3)    | —            | —                                     | 7.7(1)                     | —           | 2.15(4)                  |
|                                                 | 1100      | 6            | 42.70(24)                               | 30.1(2)                                                  | —                                                      | —                         | 24.4(3)    | —            | 0.40(3)                               | 2.40(4)                    | —           | 2.23(2)                  |

Table 0.11: NaCl flux: resulting weight percent (%) vs targeted homology composition, temperature, and dwell time, with average Ruddlesden-Popper nickel valence.

| Target                                          | T<br>(°C) | Dwell<br>(h) | La <sub>2</sub> NiO <sub>4</sub><br>(%) | La <sub>3</sub> Ni <sub>2</sub> O <sub>6.92</sub><br>(%) | La <sub>4</sub> Ni <sub>3</sub> O <sub>10</sub><br>(%) | LaNiO <sub>3</sub><br>(%) | NiO<br>(%) | LaOCl<br>(%) | La <sub>2</sub> O <sub>3</sub><br>(%) | La(OH) <sub>3</sub><br>(%) | Flux<br>(%) | $\bar{v}_{\text{Ni,RP}}$ |
|-------------------------------------------------|-----------|--------------|-----------------------------------------|----------------------------------------------------------|--------------------------------------------------------|---------------------------|------------|--------------|---------------------------------------|----------------------------|-------------|--------------------------|
| La <sub>2</sub> NiO <sub>4</sub>                | 830       | 12           | 66.4(4)                                 | 24.6(5)                                                  | —                                                      | —                         | —          | 4.40(18)     | 4.69(8)                               | —                          | —           | 2.16(5)                  |
|                                                 | 900       | 9            | 98.26(7)                                | —                                                        | —                                                      | —                         | —          | —            | 1.74(7)                               | —                          | —           | 2.00(0)                  |
|                                                 | 1000      | 6            | 84.9(3)                                 | 7.8(3)                                                   | —                                                      | —                         | —          | 7.3(2)       | —                                     | —                          | —           | 2.05(8)                  |
|                                                 | 1100      | 6            | 100                                     | —                                                        | —                                                      | —                         | —          | —            | —                                     | —                          | —           | 2.00(0)                  |
| La <sub>3</sub> Ni <sub>2</sub> O <sub>7</sub>  | 830       | 12           | 64.0(3)                                 | 33.3(3)                                                  | —                                                      | —                         | 2.5(3)     | —            | —                                     | —                          | —           | 2.20(2)                  |
|                                                 | 900       | 9            | 89.8(5)                                 | 4.4(4)                                                   | —                                                      | —                         | 5.8(4)     | —            | —                                     | —                          | —           | 2.03(18)                 |
|                                                 | 1000      | 6            | 76.5(6)                                 | 10.8(4)                                                  | —                                                      | —                         | 8.8(5)     | 3.9(3)       | —                                     | —                          | —           | 2.07(8)                  |
|                                                 | 1100      | 6            | 80.1(5)                                 | 12.8(4)                                                  | —                                                      | —                         | 7.1(4)     | —            | —                                     | —                          | —           | 2.08(7)                  |
| La <sub>4</sub> Ni <sub>3</sub> O <sub>10</sub> | 830       | 12           | 28.9(4)                                 | —                                                        | 37.9(5)                                                | 26.3(4)                   | 5.7(4)     | 1.3(2)       | —                                     | —                          | —           | 2.63(5)                  |
|                                                 | 900       | 9            | 21.1(3)                                 | 66.3(4)                                                  | 7.2(3)                                                 | —                         | 5.3(4)     | —            | —                                     | —                          | —           | 2.42(11)                 |
|                                                 | 1000      | 6            | 18.3(3)                                 | 71.7(4)                                                  | —                                                      | —                         | 6.3(4)     | 3.7(2)       | —                                     | —                          | —           | 2.41(4)                  |
|                                                 | 1100      | 6            | 72.0(4)                                 | 15.9(3)                                                  | —                                                      | —                         | 12.1(3)    | —            | —                                     | —                          | —           | 2.11(4)                  |
| La <sub>6</sub> Ni <sub>5</sub> O <sub>16</sub> | 830       | 12           | 21.4(4)                                 | —                                                        | 43.8(7)                                                | 29.9(6)                   | 4.8(5)     | —            | —                                     | —                          | —           | 2.68(7)                  |
|                                                 | 900       | 9            | —                                       | 51.6(7)                                                  | 39.5(7)                                                | 3.3(4)                    | 5.6(5)     | —            | —                                     | —                          | —           | 2.59(10)                 |
|                                                 | 1000      | 6            | —                                       | 59.9(11)                                                 | 30.9(11)                                               | —                         | 6.1(6)     | 3.1(4)       | —                                     | —                          | —           | 2.56(10)                 |
|                                                 | 1100      | 6            | 70.2(4)                                 | 15.7(3)                                                  | —                                                      | —                         | 14.1(4)    | —            | —                                     | —                          | —           | 2.11(4)                  |
| LaNiO <sub>3</sub>                              | 830       | 12           | —                                       | —                                                        | 61.7(6)                                                | 29.6(6)                   | 8.8(4)     | —            | —                                     | —                          | —           | 2.79(3)                  |
|                                                 | 900       | 9            | —                                       | 43.0(4)                                                  | 38.5(4)                                                | 7.1(3)                    | 11.3(4)    | —            | —                                     | —                          | —           | 2.62(4)                  |
|                                                 | 1000      | 6            | —                                       | 56.1(5)                                                  | 26.9(5)                                                | —                         | 13.5(5)    | 3.6(3)       | —                                     | —                          | —           | 2.56(5)                  |
|                                                 | 1100      | 6            | 45.3(13)                                | 36.3(13)                                                 | —                                                      | —                         | 18.5(6)    | —            | —                                     | —                          | —           | 2.25(10)                 |

Table 0.12: NaBr flux: resulting weight percent (%) vs targeted homology composition, temperature, and dwell time, with average Ruddlesden-Popper nickel valence.

| Target                                          | T<br>(°C) | Dwell<br>(h) | La <sub>2</sub> NiO <sub>4</sub><br>(%) | La <sub>3</sub> Ni <sub>2</sub> O <sub>6.92</sub><br>(%) | La <sub>4</sub> Ni <sub>3</sub> O <sub>10</sub><br>(%) | LaNiO <sub>3</sub><br>(%) | NiO<br>(%) | LaOCl<br>(%) | La <sub>2</sub> O <sub>3</sub><br>(%) | La(OH) <sub>3</sub><br>(%) | Flux<br>(%) | $\bar{v}_{\text{Ni,RP}}$ |
|-------------------------------------------------|-----------|--------------|-----------------------------------------|----------------------------------------------------------|--------------------------------------------------------|---------------------------|------------|--------------|---------------------------------------|----------------------------|-------------|--------------------------|
| La <sub>2</sub> NiO <sub>4</sub>                | 800       | 12           | 89.0(3)                                 | —                                                        | —                                                      | —                         | 5.5(3)     | —            | 5.42(7)                               | —                          | —           | 2.00(1)                  |
|                                                 | 900       | 9            | 98.73(9)                                | —                                                        | —                                                      | —                         | —          | —            | 1.27(9)                               | —                          | —           | 2.00(0)                  |
|                                                 | 1000      | 6            | 99.21(12)                               | —                                                        | —                                                      | —                         | —          | —            | 0.79(12)                              | —                          | —           | 2.00(0)                  |
|                                                 | 1100      | 6            | 99.19(7)                                | —                                                        | —                                                      | —                         | —          | —            | 0.81(7)                               | —                          | —           | 2.00(0)                  |
| La <sub>3</sub> Ni <sub>2</sub> O <sub>7</sub>  | 800       | 12           | 90.8(5)                                 | —                                                        | —                                                      | —                         | 7.7(5)     | —            | 1.46(60)                              | —                          | —           | 2.00(1)                  |
|                                                 | 900       | 9            | 81.4(6)                                 | 13.5(4)                                                  | —                                                      | —                         | 5.1(6)     | —            | —                                     | —                          | —           | 2.09(6)                  |
|                                                 | 1000      | 6            | 86.2(5)                                 | 7.8(4)                                                   | —                                                      | —                         | 6.1(4)     | —            | —                                     | —                          | —           | 2.05(11)                 |
|                                                 | 1100      | 6            | 78.8(7)                                 | 12.9(4)                                                  | —                                                      | —                         | 8.3(7)     | —            | —                                     | —                          | —           | 2.08(7)                  |
| La <sub>4</sub> Ni <sub>3</sub> O <sub>10</sub> | 800       | 12           | 63.6(6)                                 | —                                                        | 31.3(6)                                                | —                         | 5.0(4)     | —            | —                                     | —                          | —           | 2.27(5)                  |
|                                                 | 900       | 9            | 51.4(4)                                 | 43.1(4)                                                  | —                                                      | —                         | 5.5(5)     | —            | —                                     | —                          | —           | 2.26(3)                  |
|                                                 | 1000      | 6            | 28.1(3)                                 | 66.4(4)                                                  | —                                                      | —                         | 5.5(4)     | —            | —                                     | —                          | —           | 2.37(3)                  |
|                                                 | 1100      | 6            | 79.6(4)                                 | 10.0(3)                                                  | —                                                      | —                         | 10.4(4)    | —            | —                                     | —                          | —           | 2.07(6)                  |
| La <sub>6</sub> Ni <sub>5</sub> O <sub>16</sub> | 800       | 12           | 81.6(5)                                 | —                                                        | 10.5(3)                                                | —                         | 7.9(4)     | —            | —                                     | —                          | —           | 2.10(6)                  |
|                                                 | 900       | 9            | 12.1(5)                                 | 82.6(7)                                                  | —                                                      | —                         | 5.3(7)     | —            | —                                     | —                          | —           | 2.45(10)                 |
|                                                 | 1000      | 6            | 12.6(3)                                 | 81.4(5)                                                  | —                                                      | —                         | 6.0(4)     | —            | —                                     | —                          | —           | 2.44(6)                  |
|                                                 | 1100      | 6            | 67.3(5)                                 | 17.7(3)                                                  | —                                                      | —                         | 15.0(5)    | —            | —                                     | —                          | —           | 2.12(4)                  |
| LaNiO <sub>3</sub>                              | 800       | 12           | 44.5(4)                                 | —                                                        | 42.9(5)                                                | —                         | 12.6(4)    | —            | —                                     | —                          | —           | 2.38(3)                  |
|                                                 | 900       | 9            | 21.0(3)                                 | 65.5(5)                                                  | —                                                      | —                         | 13.5(6)    | —            | —                                     | —                          | —           | 2.40(4)                  |
|                                                 | 1000      | 6            | 15.9(3)                                 | 71.5(4)                                                  | —                                                      | —                         | 12.6(4)    | —            | —                                     | —                          | —           | 2.42(5)                  |
|                                                 | 1100      | 6            | 56.2(4)                                 | 22.0(3)                                                  | —                                                      | —                         | 21.8(5)    | —            | —                                     | —                          | —           | 2.16(3)                  |

Table 0.13: NaI flux: resulting weight percent (%) vs targeted homology composition, temperature, and dwell time, with average Ruddlesden-Popper nickel valence.

| Target                                            | T (°C)                                          | Dwell (h) | La <sub>2</sub> NiO <sub>4</sub> (%) | La <sub>3</sub> Ni <sub>2</sub> O <sub>6,92</sub> (%) | La <sub>4</sub> Ni <sub>3</sub> O <sub>10</sub> (%) | LaNiO <sub>3</sub> (%) | NiO (%) | LaOCl (%) | La <sub>2</sub> O <sub>3</sub> (%) | La(OH) <sub>3</sub> (%) | F <sub>lux</sub> (%) | $\bar{v}_{\text{Ni,RP}}$ |          |
|---------------------------------------------------|-------------------------------------------------|-----------|--------------------------------------|-------------------------------------------------------|-----------------------------------------------------|------------------------|---------|-----------|------------------------------------|-------------------------|----------------------|--------------------------|----------|
| La <sub>2</sub> NiO <sub>4</sub>                  | 700                                             | 48        | 33.1(4)                              | 31.0(4)                                               | —                                                   | 27.8(4)                | —       | —         | 2.59(8)                            | 5.46(10)                | —                    | 2.55(6)                  |          |
|                                                   | 750                                             | 48        | 14.1(3)                              | 36.1(5)                                               | —                                                   | 36.5(5)                | —       | —         | 5.9(3)                             | 7.44(11)                | —                    | 2.69(8)                  |          |
|                                                   | 800                                             | 12        | 31.5(5)                              | 22.2(6)                                               | —                                                   | 39.8(5)                | —       | —         | 0.6(1)                             | 5.9(1)                  | —                    | 2.63(9)                  |          |
|                                                   | 850                                             | 12        | 81.0(4)                              | 14.3(4)                                               | —                                                   | —                      | —       | —         | 1.17(7)                            | 3.55(8)                 | —                    | 2.09(6)                  |          |
|                                                   | 900                                             | 9         | 100                                  | —                                                     | —                                                   | —                      | —       | —         | —                                  | —                       | —                    | 2.00(0)                  |          |
|                                                   | 950                                             | 9         | 99.5(1)                              | —                                                     | —                                                   | —                      | —       | —         | 0.5(1)                             | —                       | —                    | 2.00(0)                  |          |
|                                                   | 1000                                            | 6         | 98.40(8)                             | —                                                     | —                                                   | —                      | —       | —         | 1.60(8)                            | —                       | —                    | 2.00(0)                  |          |
|                                                   | 1100                                            | 2         | 97.76(7)                             | —                                                     | —                                                   | —                      | —       | —         | 2.24(7)                            | —                       | —                    | 2.00(0)                  |          |
|                                                   | La <sub>3</sub> Ni <sub>2</sub> O <sub>7</sub>  | 700       | 48                                   | 18.4(5)                                               | 33.0(8)                                             | —                      | 40.0(7) | 5.8(6)    | —                                  | 0.79(10)                | 1.94(10)             | —                        | 2.69(11) |
|                                                   |                                                 | 750       | 48                                   | 15.4(4)                                               | 16.0(5)                                             | —                      | 65.3(6) | —         | —                                  | —                       | 3.1(1)               | —                        | 2.82(12) |
| 800                                               |                                                 | 12        | 26.5(4)                              | 24.7(5)                                               | —                                                   | 47.6(5)                | —       | —         | —                                  | 1.3(1)                  | —                    | 2.69(7)                  |          |
| 850                                               |                                                 | 12        | 44.2(6)                              | 28.5(8)                                               | —                                                   | 26.8(6)                | —       | —         | 0.55(6)                            | —                       | —                    | 2.50(10)                 |          |
| 900                                               |                                                 | 9         | 41.2(1)                              | 16.0(2)                                               | 27.5(8)                                             | 15.6(5)                | —       | —         | —                                  | —                       | —                    | 2.49(8)                  |          |
| 950                                               |                                                 | 9         | 36.338(4)                            | —                                                     | 63.662(4)                                           | —                      | —       | —         | —                                  | —                       | —                    | 2.47(0)                  |          |
| 1000                                              |                                                 | 6         | 50.5(3)                              | —                                                     | 49.5(3)                                             | —                      | —       | —         | —                                  | —                       | —                    | 2.38(2)                  |          |
| 1100                                              |                                                 | 2         | 95.2(3)                              | —                                                     | —                                                   | —                      | 4.8(3)  | —         | —                                  | —                       | —                    | 2.00(1)                  |          |
| La <sub>4</sub> Ni <sub>3</sub> O <sub>10</sub>   |                                                 | 700       | 48                                   | 20.6(5)                                               | 26.9(9)                                             | —                      | 49.7(7) | 2.8(4)    | —                                  | —                       | —                    | —                        | 2.72(12) |
|                                                   |                                                 | 750       | 48                                   | 17.2(4)                                               | —                                                   | —                      | 82.8(4) | —         | —                                  | —                       | —                    | —                        | 2.89(7)  |
|                                                   | 800                                             | 12        | 28.9(4)                              | —                                                     | —                                                   | 71.1(4)                | —       | —         | —                                  | —                       | —                    | 2.80(4)                  |          |
|                                                   | 850                                             | 12        | 25.9(5)                              | —                                                     | 38.6(8)                                             | 35.5(9)                | —       | —         | —                                  | —                       | —                    | 2.68(10)                 |          |
|                                                   | 900                                             | 9         | 18.4(3)                              | —                                                     | 56.5(4)                                             | 21.0(3)                | 4.1(3)  | —         | —                                  | —                       | —                    | 2.66(5)                  |          |
|                                                   | 950                                             | 9         | 2.2(3)                               | —                                                     | 97.8(3)                                             | —                      | —       | —         | —                                  | —                       | —                    | 2.66(36)                 |          |
|                                                   | 1000                                            | 6         | 14.3(4)                              | —                                                     | 85.7(4)                                             | —                      | —       | —         | —                                  | —                       | —                    | 2.59(7)                  |          |
|                                                   | 1100                                            | 2         | 90.2(5)                              | —                                                     | —                                                   | —                      | 9.8(5)  | —         | —                                  | —                       | —                    | 2.00(1)                  |          |
|                                                   | La <sub>6</sub> Ni <sub>5</sub> O <sub>16</sub> | 700       | 48                                   | 15.2(5)                                               | 25.2(7)                                             | —                      | 59.7(8) | —         | —                                  | —                       | —                    | —                        | 2.79(13) |
|                                                   |                                                 | 750       | 48                                   | 8.5(3)                                                | —                                                   | —                      | 91.5(3) | —         | —                                  | —                       | —                    | —                        | 2.95(10) |
| 800                                               |                                                 | 12        | 13.0(3)                              | —                                                     | 27.9(5)                                             | 59.1(5)                | —       | —         | —                                  | —                       | —                    | 2.83(8)                  |          |
| 850                                               |                                                 | 12        | 8.5(3)                               | —                                                     | 38.7(7)                                             | 52.7(6)                | —       | —         | —                                  | —                       | —                    | 2.82(11)                 |          |
| 900                                               |                                                 | 9         | 7.3(5)                               | —                                                     | 64.5(5)                                             | 28.3(4)                | —       | —         | —                                  | —                       | —                    | 2.74(19)                 |          |
| 950                                               |                                                 | 9         | —                                    | —                                                     | 100                                                 | —                      | —       | —         | —                                  | —                       | —                    | 2.67(0)                  |          |
| 1000                                              |                                                 | 6         | 6.7(4)                               | —                                                     | 89.1(5)                                             | —                      | 4.2(3)  | —         | —                                  | —                       | —                    | 2.63(16)                 |          |
| 1100                                              |                                                 | 2         | 78.0(5)                              | —                                                     | 10.7(4)                                             | —                      | 11.3(4) | —         | —                                  | —                       | —                    | 2.10(8)                  |          |
| La <sub>13</sub> Ni <sub>12</sub> O <sub>37</sub> |                                                 | 700       | 48                                   | 6.4(3)                                                | 16.2(5)                                             | —                      | 77.4(5) | —         | —                                  | —                       | —                    | —                        | 2.89(16) |
|                                                   |                                                 | 750       | 48                                   | —                                                     | —                                                   | —                      | 100     | —         | —                                  | —                       | —                    | —                        | 3.00(0)  |
|                                                   | 800                                             | 12        | —                                    | —                                                     | —                                                   | 100                    | —       | —         | —                                  | —                       | —                    | 3.00(0)                  |          |
|                                                   | 850                                             | 12        | —                                    | —                                                     | 26.2(5)                                             | 73.8(5)                | —       | —         | —                                  | —                       | —                    | 2.92(6)                  |          |
|                                                   | 900                                             | 9         | —                                    | —                                                     | 44.2(4)                                             | 51.2(4)                | 4.7(4)  | —         | —                                  | —                       | —                    | 2.86(3)                  |          |
|                                                   | 950                                             | 9         | —                                    | —                                                     | 89.4(3)                                             | 6.1(3)                 | 4.5(2)  | —         | —                                  | —                       | —                    | 2.69(13)                 |          |
|                                                   | 1000                                            | 6         | 2.4(2)                               | —                                                     | 88.6(5)                                             | —                      | 9.0(4)  | —         | —                                  | —                       | —                    | 2.65(22)                 |          |
|                                                   | 1100                                            | 2         | 80.3(5)                              | —                                                     | 5.0(3)                                              | —                      | 14.7(4) | —         | —                                  | —                       | —                    | 2.05(12)                 |          |
|                                                   | LaNiO <sub>3</sub>                              | 700       | 48                                   | 11.9(3)                                               | 20.3(7)                                             | —                      | 58.4(7) | 9.4(4)    | —                                  | —                       | —                    | —                        | 2.81(12) |
|                                                   |                                                 | 750       | 48                                   | —                                                     | —                                                   | —                      | 100     | —         | —                                  | —                       | —                    | —                        | 3.00(0)  |
| 800                                               |                                                 | 12        | —                                    | —                                                     | —                                                   | 100                    | —       | —         | —                                  | —                       | —                    | 3.00(0)                  |          |
| 850                                               |                                                 | 12        | —                                    | —                                                     | 21.1(4)                                             | 77.0(5)                | 1.9(4)  | —         | —                                  | —                       | —                    | 2.94(6)                  |          |
| 900                                               |                                                 | 9         | —                                    | —                                                     | 50.7(3)                                             | 44.4(3)                | 4.9(2)  | —         | —                                  | —                       | —                    | 2.84(3)                  |          |
| 950                                               |                                                 | 9         | —                                    | —                                                     | 78.8(5)                                             | 12.0(4)                | 9.2(4)  | —         | —                                  | —                       | —                    | 2.72(9)                  |          |
| 1000                                              |                                                 | 6         | 13.0(2)                              | —                                                     | 74.5(3)                                             | —                      | 12.5(3) | —         | —                                  | —                       | —                    | 2.59(4)                  |          |
| 1100                                              |                                                 | 2         | 78.4(4)                              | —                                                     | 6.7(3)                                              | —                      | 14.9(3) | —         | —                                  | —                       | —                    | 2.07(9)                  |          |
| LaNi <sub>1.2</sub> O <sub>3</sub>                |                                                 | 700       | 48                                   | 3.1(4)                                                | 13.6(8)                                             | —                      | 71.7(8) | 11.6(4)   | —                                  | —                       | —                    | —                        | 2.92(41) |
|                                                   |                                                 | 750       | 48                                   | —                                                     | —                                                   | —                      | 92.1(3) | 7.9(3)    | —                                  | —                       | —                    | —                        | 3.00(1)  |
|                                                   | 800                                             | 12        | —                                    | —                                                     | —                                                   | 92.2(4)                | 7.8(4)  | —         | —                                  | —                       | —                    | 3.00(1)                  |          |
|                                                   | 850                                             | 12        | —                                    | —                                                     | —                                                   | 92.3(4)                | 7.7(4)  | —         | —                                  | —                       | —                    | 3.00(1)                  |          |
|                                                   | 900                                             | 9         | —                                    | —                                                     | 33.6(4)                                             | 57.1(5)                | 9.3(3)  | —         | —                                  | —                       | —                    | 2.89(4)                  |          |
|                                                   | 950                                             | 9         | —                                    | —                                                     | 56.6(4)                                             | 32.8(4)                | 10.6(3) | —         | —                                  | —                       | —                    | 2.80(4)                  |          |
|                                                   | 1000                                            | 6         | 13.8(2)                              | —                                                     | 67.1(3)                                             | —                      | 19.1(3) | —         | —                                  | —                       | —                    | 2.58(4)                  |          |
|                                                   | 1100                                            | 2         | 12.3(3)                              | —                                                     | 37.2(6)                                             | 36.1(5)                | 14.4(4) | —         | —                                  | —                       | —                    | 2.76(8)                  |          |

Table 0.14: KCl flux: resulting weight percent (%) vs targeted homology composition, temperature, and dwell time, with average Ruddlesden-Popper nickel valence.

| Target                                          | T<br>(°C) | Dwell<br>(h) | La <sub>2</sub> NiO <sub>4</sub><br>(%) | La <sub>3</sub> Ni <sub>2</sub> O <sub>6.92</sub><br>(%) | La <sub>4</sub> Ni <sub>3</sub> O <sub>10</sub><br>(%) | LaNiO <sub>3</sub><br>(%) | NiO<br>(%) | LaOCl<br>(%) | La <sub>2</sub> O <sub>3</sub><br>(%) | La(OH) <sub>3</sub><br>(%) | Flux<br>(%) | $\bar{v}_{\text{Ni,RP}}$ |
|-------------------------------------------------|-----------|--------------|-----------------------------------------|----------------------------------------------------------|--------------------------------------------------------|---------------------------|------------|--------------|---------------------------------------|----------------------------|-------------|--------------------------|
| La <sub>2</sub> NiO <sub>4</sub>                | 800       | 12           | 50.66                                   | —                                                        | —                                                      | —                         | —          | —            | —                                     | —                          | 49.34       | 2.00(0)                  |
|                                                 | 900       | 9            | 100                                     | —                                                        | —                                                      | —                         | —          | —            | —                                     | —                          | —           | 2.00(0)                  |
|                                                 | 1000      | 6            | 100                                     | —                                                        | —                                                      | —                         | —          | —            | —                                     | —                          | —           | 2.00(0)                  |
|                                                 | 1100      | 6            | 100                                     | —                                                        | —                                                      | —                         | —          | —            | —                                     | —                          | —           | 2.00(0)                  |
| La <sub>3</sub> Ni <sub>2</sub> O <sub>7</sub>  | 800       | 12           | 43.8(2)                                 | —                                                        | —                                                      | —                         | 3.1(3)     | 1.380(15)    | —                                     | —                          | 51.7(3)     | 2.00(1)                  |
|                                                 | 900       | 9            | 38.6(5)                                 | 39.4(5)                                                  | 12.5(5)                                                | —                         | 5.9(4)     | 3.5(2)       | —                                     | —                          | —           | 2.34(10)                 |
|                                                 | 1000      | 6            | 14.4(3)                                 | 75.5(5)                                                  | —                                                      | —                         | 3.7(4)     | 6.4(3)       | —                                     | —                          | —           | 2.43(5)                  |
|                                                 | 1100      | 6            | 59.7(7)                                 | 29.2(5)                                                  | —                                                      | —                         | 11.1(9)    | —            | —                                     | —                          | —           | 2.19(5)                  |
| La <sub>4</sub> Ni <sub>3</sub> O <sub>10</sub> | 800       | 12           | 47.6(4)                                 | —                                                        | 29.4(4)                                                | —                         | 3.4(3)     | 1.70(12)     | —                                     | —                          | 17.9(3)     | 2.30(4)                  |
|                                                 | 900       | 9            | 13.4(3)                                 | 42.5(5)                                                  | 37.5(4)                                                | —                         | 5.5(5)     | 1.2(2)       | —                                     | —                          | —           | 2.51(7)                  |
|                                                 | 1000      | 6            | 9.4(2)                                  | 85.2(4)                                                  | —                                                      | —                         | 4.3(3)     | 1.10(16)     | —                                     | —                          | —           | 2.46(5)                  |
|                                                 | 1100      | 6            | 61.3(5)                                 | 28.1(4)                                                  | —                                                      | —                         | 10.6(5)    | —            | —                                     | —                          | —           | 2.18(4)                  |
| La <sub>6</sub> Ni <sub>5</sub> O <sub>16</sub> | 800       | 12           | 49.2(6)                                 | —                                                        | 42.8(6)                                                | —                         | 8.0(6)     | —            | —                                     | —                          | —           | 2.36(4)                  |
|                                                 | 900       | 9            | 11.5(4)                                 | 23.9(7)                                                  | 49.5(7)                                                | 5.1(4)                    | 8.8(4)     | 1.2(5)       | —                                     | —                          | —           | 2.58(14)                 |
|                                                 | 1000      | 6            | —                                       | 79.5(6)                                                  | —                                                      | 13.8(4)                   | 5.8(4)     | 1.0(2)       | —                                     | —                          | —           | 2.59(8)                  |
|                                                 | 1100      | 6            | 64.9(4)                                 | 20.7(3)                                                  | —                                                      | —                         | 14.4(4)    | —            | —                                     | —                          | —           | 2.14(3)                  |
| LaNiO <sub>3</sub>                              | 800       | 12           | 41.6(5)                                 | —                                                        | 21.9(6)                                                | 21.2(6)                   | 13.5(3)    | 1.70(12)     | —                                     | —                          | —           | 2.51(10)                 |
|                                                 | 900       | 9            | 3.2(2)                                  | 15.4(3)                                                  | 40.2(5)                                                | 9.0(3)                    | 11.3(5)    | 12.7(2)      | —                                     | —                          | 8.2(4)      | 2.66(18)                 |
|                                                 | 1000      | 6            | —                                       | 72.8(6)                                                  | —                                                      | 13.2(4)                   | 12.1(5)    | 1.8(2)       | —                                     | —                          | —           | 2.60(8)                  |
|                                                 | 1100      | 6            | 40.5(6)                                 | 37.2(5)                                                  | —                                                      | —                         | 22.2(5)    | —            | —                                     | —                          | —           | 2.27(5)                  |

Table 0.15: KBr flux: resulting weight percent (%) vs targeted homology composition, temperature, and dwell time, with average Ruddlesden-Popper nickel valence.

| Target                                          | T<br>(°C) | Dwell<br>(h) | La <sub>2</sub> NiO <sub>4</sub><br>(%) | La <sub>3</sub> Ni <sub>2</sub> O <sub>6.92</sub><br>(%) | La <sub>4</sub> Ni <sub>3</sub> O <sub>10</sub><br>(%) | LaNiO <sub>3</sub><br>(%) | NiO<br>(%) | LaOCl<br>(%) | La <sub>2</sub> O <sub>3</sub><br>(%) | La(OH) <sub>3</sub><br>(%) | Flux<br>(%) | $\bar{v}_{\text{Ni,RP}}$ |
|-------------------------------------------------|-----------|--------------|-----------------------------------------|----------------------------------------------------------|--------------------------------------------------------|---------------------------|------------|--------------|---------------------------------------|----------------------------|-------------|--------------------------|
| La <sub>2</sub> NiO <sub>4</sub>                | 800       | 12           | 51.5(8)                                 | 21.50(11)                                                | —                                                      | —                         | 10.8(5)    | —            | 10.79(19)                             | 5.42(16)                   | —           | 2.17(4)                  |
|                                                 | 900       | 9            | 82.7(5)                                 | 14.2(5)                                                  | —                                                      | —                         | —          | —            | 3.17(2)                               | —                          | —           | 2.09(7)                  |
|                                                 | 1000      | 6            | 100                                     | —                                                        | —                                                      | —                         | —          | —            | —                                     | —                          | —           | 2.00(0)                  |
|                                                 | 1100      | 6            | 99.27(8)                                | —                                                        | —                                                      | —                         | —          | —            | 0.73(8)                               | —                          | —           | 2.00(0)                  |
| La <sub>3</sub> Ni <sub>2</sub> O <sub>7</sub>  | 800       | 12           | 44.8(9)                                 | 22.4(13)                                                 | 9.5(8)                                                 | —                         | 13.0(6)    | —            | 6.29(16)                              | 3.95(15)                   | —           | 2.26(24)                 |
|                                                 | 900       | 9            | 54.0(4)                                 | 44.0(4)                                                  | —                                                      | —                         | 2.1(3)     | —            | —                                     | —                          | —           | 2.25(3)                  |
|                                                 | 1000      | 6            | 67.6(7)                                 | 27.6(3)                                                  | —                                                      | —                         | 4.9(9)     | —            | —                                     | —                          | —           | 2.17(3)                  |
|                                                 | 1100      | 6            | 59.6(4)                                 | 36.8(3)                                                  | —                                                      | —                         | 3.6(5)     | —            | —                                     | —                          | —           | 2.22(2)                  |
| La <sub>4</sub> Ni <sub>3</sub> O <sub>10</sub> | 800       | 12           | 58.4(7)                                 | —                                                        | 35.1(7)                                                | —                         | 6.5(5)     | —            | —                                     | —                          | —           | 2.30(5)                  |
|                                                 | 900       | 9            | 17.8(3)                                 | 78.1(4)                                                  | —                                                      | —                         | 4.0(4)     | —            | —                                     | —                          | —           | 2.42(4)                  |
|                                                 | 1000      | 6            | 41.0(3)                                 | 52.9(3)                                                  | —                                                      | —                         | 6.2(4)     | —            | —                                     | —                          | —           | 2.31(2)                  |
|                                                 | 1100      | 6            | 58.2(3)                                 | 36.6(3)                                                  | —                                                      | —                         | 5.2(3)     | —            | —                                     | —                          | —           | 2.22(2)                  |
| La <sub>6</sub> Ni <sub>5</sub> O <sub>16</sub> | 800       | 12           | 48.4(4)                                 | —                                                        | 44.9(5)                                                | —                         | 6.8(4)     | —            | —                                     | —                          | —           | 2.37(3)                  |
|                                                 | 900       | 9            | 13.8(3)                                 | 81.3(5)                                                  | —                                                      | —                         | 4.9(4)     | —            | —                                     | —                          | —           | 2.44(6)                  |
|                                                 | 1000      | 6            | 24.6(3)                                 | 68.1(4)                                                  | —                                                      | —                         | 7.2(3)     | —            | —                                     | —                          | —           | 2.39(3)                  |
|                                                 | 1100      | 6            | 52.7(3)                                 | 38.0(3)                                                  | —                                                      | —                         | 9.3(3)     | —            | —                                     | —                          | —           | 2.24(2)                  |
| LaNiO <sub>3</sub>                              | 800       | 12           | 46.2(6)                                 | —                                                        | 21.5(9)                                                | —                         | 23.8(5)    | —            | 5.6(1)                                | 2.8(1)                     | —           | 2.26(10)                 |
|                                                 | 900       | 9            | 58.4(4)                                 | 27.3(3)                                                  | —                                                      | —                         | 14.4(4)    | —            | —                                     | —                          | —           | 2.18(3)                  |
|                                                 | 1000      | 6            | 64.6(3)                                 | 20.7(3)                                                  | —                                                      | —                         | 14.7(3)    | —            | —                                     | —                          | —           | 2.14(3)                  |
|                                                 | 1100      | 6            | 42.4(2)                                 | 39.4(2)                                                  | —                                                      | —                         | 18.1(3)    | —            | —                                     | —                          | —           | 2.27(2)                  |

Table 0.16: KI flux: resulting weight percent (%) vs targeted homology composition, temperature, and dwell time, with average Ruddlesden-Popper nickel valence.

| Target                                          | T<br>(°C) | Dwell<br>(h) | La <sub>2</sub> NiO <sub>4</sub><br>(%) | La <sub>3</sub> Ni <sub>2</sub> O <sub>6,92</sub><br>(%) | La <sub>4</sub> Ni <sub>3</sub> O <sub>10</sub><br>(%) | LaNiO <sub>3</sub><br>(%) | NiO<br>(%) | LaOCl<br>(%) | La <sub>2</sub> O <sub>3</sub><br>(%) | La(OH) <sub>3</sub><br>(%) | Flux<br>(%) | $\bar{v}_{\text{Ni,RP}}$ |
|-------------------------------------------------|-----------|--------------|-----------------------------------------|----------------------------------------------------------|--------------------------------------------------------|---------------------------|------------|--------------|---------------------------------------|----------------------------|-------------|--------------------------|
| La <sub>2</sub> NiO <sub>4</sub>                | 800       | 12           | 30.9(60)                                | 10.7(5)                                                  | 38.2(7)                                                | —                         | 6.9(4)     | —            | —                                     | 13.2(2)                    | —           | 2.43(49)                 |
|                                                 | 900       | 9            | 82.5(4)                                 | 16.8(4)                                                  | —                                                      | —                         | —          | —            | 0.65(5)                               | —                          | —           | 2.10(5)                  |
|                                                 | 1000      | 6            | 100                                     | —                                                        | —                                                      | —                         | —          | —            | —                                     | —                          | —           | 2.00(0)                  |
|                                                 | 1100      | 2            | 100                                     | —                                                        | —                                                      | —                         | —          | —            | —                                     | —                          | —           | 2.00(0)                  |
| La <sub>3</sub> Ni <sub>2</sub> O <sub>7</sub>  | 800       | 12           | 20.3(8)                                 | 39.40(14)                                                | 21.9(9)                                                | —                         | 10.5(6)    | —            | —                                     | 7.8(2)                     | —           | 2.45(14)                 |
|                                                 | 900       | 9            | 33.1(4)                                 | 34.0(6)                                                  | 32.9(6)                                                | —                         | —          | —            | —                                     | —                          | —           | 2.42(7)                  |
|                                                 | 1000      | 6            | 18.3(4)                                 | 75.0(6)                                                  | 6.7(5)                                                 | —                         | —          | —            | —                                     | —                          | —           | 2.44(19)                 |
|                                                 | 1100      | 2            | 78.3(5)                                 | 17.8(4)                                                  | —                                                      | —                         | 4.0(3)     | —            | —                                     | —                          | —           | 2.11(5)                  |
| La <sub>4</sub> Ni <sub>3</sub> O <sub>10</sub> | 800       | 12           | 26.9(5)                                 | —                                                        | 48.0(7)                                                | 18.3(4)                   | 5.7(3)     | —            | —                                     | 1.10(5)                    | —           | 2.60(6)                  |
|                                                 | 900       | 9            | 15.4(3)                                 | 23.4(5)                                                  | 47.1(5)                                                | 8.9(3)                    | 5.1(5)     | —            | —                                     | —                          | —           | 2.58(8)                  |
|                                                 | 1000      | 6            | 3.8(3)                                  | 60.8(5)                                                  | 29.4(4)                                                | —                         | 6.1(5)     | —            | —                                     | —                          | —           | 2.54(20)                 |
|                                                 | 1100      | 2            | 76.5(4)                                 | 17.4(3)                                                  | —                                                      | —                         | 6.1(3)     | —            | —                                     | —                          | —           | 2.11(4)                  |
| La <sub>6</sub> Ni <sub>5</sub> O <sub>16</sub> | 800       | 12           | 22.9(9)                                 | —                                                        | 51.1(17)                                               | 18.6(9)                   | 7.3(6)     | —            | —                                     | —                          | —           | 2.62(14)                 |
|                                                 | 900       | 9            | —                                       | 32.9(9)                                                  | 56.8(10)                                               | 6.5(5)                    | 3.9(6)     | —            | —                                     | —                          | —           | 2.64(10)                 |
|                                                 | 1000      | 6            | —                                       | 45.7(9)                                                  | 47.2(9)                                                | —                         | 7.1(7)     | —            | —                                     | —                          | —           | 2.59(7)                  |
|                                                 | 1100      | 2            | 72.2(4)                                 | 18.1(4)                                                  | —                                                      | —                         | 9.7(3)     | —            | —                                     | —                          | —           | 2.12(5)                  |
| LaNiO <sub>3</sub>                              | 800       | 12           | 8.3(4)                                  | —                                                        | 47.4(7)                                                | 33.5(7)                   | 10.9(5)    | —            | —                                     | —                          | —           | 2.77(14)                 |
|                                                 | 900       | 9            | —                                       | 28.7(5)                                                  | 44.8(7)                                                | 17.2(12)                  | 9.3(3)     | —            | —                                     | —                          | —           | 2.69(8)                  |
|                                                 | 1000      | 6            | —                                       | 35.4(4)                                                  | 48.9(4)                                                | 5.0(3)                    | 10.7(3)    | —            | —                                     | —                          | —           | 2.63(5)                  |
|                                                 | 1100      | 2            | 65.6(5)                                 | 20.8(5)                                                  | —                                                      | —                         | 13.6(4)    | —            | —                                     | —                          | —           | 2.14(5)                  |

Table 0.17: Standard Gibbs free energies used to compute  $\Delta G_r^\circ$  for  $AX \rightarrow AXO_4$  [19]

| Reaction                                 | $\Delta G_f^\circ [AXO_4]$ ( $\text{kJ}\cdot\text{mol}^{-1}$ ) | $\Delta G_f^\circ [AX]$ ( $\text{kJ}\cdot\text{mol}^{-1}$ ) | $\Delta G_{\text{reaction}}^\circ$ ( $\text{kJ}\cdot\text{mol}^{-1}$ ) |
|------------------------------------------|----------------------------------------------------------------|-------------------------------------------------------------|------------------------------------------------------------------------|
| $\text{NaCl} \rightarrow \text{NaClO}_4$ | -254.85                                                        | -384.14                                                     | 129.29                                                                 |
| $\text{KCl} \rightarrow \text{KClO}_4$   | -303.09                                                        | -409.14                                                     | 106.05                                                                 |
| $\text{NaBr} \rightarrow \text{NaBrO}_4$ | -143.86                                                        | -348.98                                                     | 205.12                                                                 |
| $\text{KBr} \rightarrow \text{KBrO}_4$   | -174.41                                                        | -380.66                                                     | 206.25                                                                 |
| $\text{NaI} \rightarrow \text{NaIO}_4$   | -323.02                                                        | -286.06                                                     | -36.96                                                                 |
| $\text{KI} \rightarrow \text{KIO}_4$     | -361.35                                                        | -324.89                                                     | -36.46                                                                 |

## Bibliography

- [1] Wanklyn, B. M. Flux Growth of Some Complex Oxide Materials. *J Mater Sci* **1972**, *7*, 813–821.
- [2] Bugaris, H., D. E. and Zur-Loye Materials Discovery by Flux Crystal Growth: Quaternary and Higher Order Oxides. *Angew Chem Int Ed* **2012**, *51*, 3780–3811.
- [3] Klepov, V. V.; Juillerat, C. A.; Pace, K. A.; Morrison, G.; Zur-Loye, H.-C. “Soft” Alkali Bromide and Iodide Fluxes for Crystal Growth. *Front. Chem.* **2020**, *8*.
- [4] Bednorz, J. G.; Müller, K. A. Possible highT c Superconductivity in the Ba-La-Cu-O System. *Z. Physik B - Condensed Matter* **1986**, *64*, 189–193.
- [5] Park, C.; Snyder, R. L. Structures of High-Temperature Cuprate Superconductors. *Journal of the American Ceramic Society* **1995**, *78*, 3171–3194.
- [6] Li, D.; Lee, K.; Wang, B. Y.; Osada, M.; Crossley, S.; Lee, H. R.; Cui, Y.; Hikita, Y.; Hwang, H. Y. Superconductivity in an Infinite-Layer Nickelate. *Nature* **2019**, *572*, 624–627.
- [7] Osada, M.; Wang, B. Y.; Goodge, B. H.; Lee, K.; Yoon, H.; Sakuma, K.; Li, D.; Miura, M.; Kourkoutis, L. F.; Hwang, H. Y. A Superconducting Praseodymium Nickelate with Infinite Layer Structure. *Nano Lett.* **2020**, *20*, 5735–5740.
- [8] Osada, M.; Wang, B. Y.; Goodge, B. H.; Harvey, S. P.; Lee, K.; Li, D.; Kourkoutis, L. F.; Hwang, H. Y. Nickelate Superconductivity without Rare-Earth Magnetism: (La,Sr)NiO<sub>2</sub>. *Advanced Materials* **2021**, *33*, 2104083.
- [9] Zeng, S.; Li, C.; Chow, L. E.; Cao, Y.; Zhang, Z.; Tang, C. S.; Yin, X.; Lim, Z. S.; Hu, J.; Yang, P.; Ariando, A. Superconductivity in Infinite-Layer Nickelate La<sub>1-x</sub>Ca<sub>x</sub>NiO<sub>2</sub> Thin Films. *Sci. Adv.* **2022**, *8*, eabl9927.
- [10] Pan, G. A. et al. Superconductivity in a Quintuple-Layer Square-Planar Nickelate. *Nat. Mater.* **2022**, *21*, 160–164.
- [11] Sun, H.; Huo, M.; Hu, X.; Li, J.; Liu, Z.; Han, Y.; Tang, L.; Mao, Z.; Yang, P.; Wang, B.; Cheng, J.; Yao, D.-X.; Zhang, G.-M.; Wang, M. Signatures of Superconductivity near 80 K in a Nickelate under High Pressure. *Nature* **2023**, *621*, 493–498.
- [12] Zhu, Y. et al. Superconductivity in Pressurized Trilayer La<sub>4</sub>Ni<sub>3</sub>O<sub>10</sub> Single Crystals. *Nature* **2024**, *631*, 531–536.
- [13] Wold, A.; Post, B.; Banks, E. Rare Earth Nickel Oxides. *J. Am. Chem. Soc.* **1957**, *79*, 4911–4913.

- [14] Shivakumara, C.; Hegde, M. S.; Prakash, A. S.; Khadar, A. M. A.; Subbanna, G. N.; Lalla, N. P. Low Temperature Synthesis, Structure and Properties of Alkali-Doped  $\text{La}_2\text{NiO}_4$ ,  $\text{LaNiO}_3$  and  $\text{LaNi}_{0.85}\text{Cu}_{0.15}\text{O}_3$  from Alkali Hydroxide Fluxes. *Solid State Sciences* **2003**, *5*, 351–357.
- [15] Klein, Y. M.; Kozłowski, M.; Linden, A.; Lacorre, M., P.; Medarde; Gawryluk, D. J.  $\text{RENiO}_3$  Single Crystals (RE = Nd, Sm, Gd, Dy, Y, Ho, Er, Lu) Grown from Molten Salts under 2000 Bar of Oxygen Gas Pressure. *Crystal Growth Design* **2021**, *21*, 4230–4241.
- [16] Zhang, J.; Zheng, H.; Ren, Y.; Mitchell, J. F. High-Pressure Floating-Zone Growth of Perovskite Nickelate  $\text{LaNiO}_3$  Single Crystals. *Crystal Growth Design* **2017**, *17*, 2730–2735.
- [17] Zhang, J.; Zheng, H.; Chen, Y.-S.; Ren, Y.; Yonemura, M.; Huq, A.; Mitchell, J. F. High Oxygen Pressure Floating Zone Growth and Crystal Structure of the Metallic Nickelates  $\text{R}_4\text{Ni}_3\text{O}_{10}$  (R = La, Pr). *Phys. Rev. Materials* **2020**, *4*, 083402.
- [18] Guo, H.; Li, Z. W.; Zhao, L.; Hu, Z.; Chang, C. F.; Kuo, C.-Y.; Schmidt, W.; Piovano, A.; Pi, T. W.; Sobolev, O.; Khomskii, D. I.; Tjeng, L. H.; Komarek, A. C. Antiferromagnetic Correlations in the Metallic Strongly Correlated Transition Metal Oxide  $\text{LaNiO}_3$ . *Nat Commun* **2018**, *9*, 43.
- [19] Reed, J. J. The NBS Tables of Chemical Thermodynamic Properties: Selected Values for Inorganic and C1 and C2 Organic Substances in SI Units. 2020; <https://data.nist.gov/od/id/mds2-2124>.
